# Supplementary material for: Selective nickel-catalyzed fluoroalkylations of olefins
Source: Royal Society of Chemistry journal article supplement (doi:10.1039/d0cc06652d), 2020-01-01

## SUPPORTING INFORMATION

---

### Supporting Information

#### Selective Nickel-catalyzed Fluoroalkylations of Olefins

Shaoke Zhang, Florian Weniger, Fei Ye, Jabor Rabeah, Stefan Ellinger, Florencio Zaragoza, Christoph Taeschler,  
Helfried Neumann, Angelika Brückner and Matthias Beller\*

Leibniz-Institut für Katalyse e. V. an der Universität Rostock,  
Albert-Einstein Straße 29a, Rostock, 18059, Germany

[Matthias.Beller@catalysis.de](mailto:Matthias.Beller@catalysis.de)

# SUPPORTING INFORMATION

---

## Table of contents

|                                                                                     |     |
|-------------------------------------------------------------------------------------|-----|
| 1. General comments.....                                                            | S3  |
| 2. Analytical methods.....                                                          | S3  |
| 3. General procedures.....                                                          | S3  |
| 3.1 Synthesis of dppfNi( <i>o</i> -tol)Cl .....                                     | S3  |
| 3.2 Synthesis of perfluoroalkylated alkenes .....                                   | S4  |
| 3.3 Synthesis of 3,3-dimethyl-trifluoromethyl butene using CF <sub>3</sub> Br ..... | S4  |
| 3.4 Synthesis of alkenes .....                                                      | S5  |
| 4. Kinetic time course.....                                                         | S6  |
| 5. In situ EPR .....                                                                | S7  |
| 6. Characterization data.....                                                       | S8  |
| 6.1 Characterization data of alkenes.....                                           | S8  |
| 6.2 Characterization data of perfluorodecylated alkenes.....                        | S10 |
| 6.3 Characterization data of other perfluoroalkylated alkenes .....                 | S16 |
| 6.4 Characterization data of trifluoromethylated alkenes .....                      | S17 |
| 6.5 Characterization data of others .....                                           | S20 |
| 7. References .....                                                                 | S20 |
| 8. Spectra.....                                                                     | S21 |
| 8.1 Spectra of alkenes.....                                                         | S21 |
| 8.2 Spectra of perfluorodecylated alkenes.....                                      | S25 |
| 8.3 Spectra of other perfluoroalkylated alkenes .....                               | S50 |
| 8.4 Spectra of trifluoromethylated alkenes .....                                    | S58 |
| 8.5 Spectra of others.....                                                          | S67 |

# SUPPORTING INFORMATION

## 1. General comments

All reactions were carried out under an atmosphere of dry argon using standard Schlenk technique, Ace pressure tube or 300 mL autoclave equipped with 10 mL vials. Chemicals were purchased from *Aldrich*, *TCl*, *Alfa*, or *ABCR*. 3,3-Dimethylbutene was frozen and vacuumed for 3 times to get rid of H<sub>2</sub>O and O<sub>2</sub> and stored in a Schlenk tube or stored in the fridge of the glovebox as received. Allylbenzene was distilled at 40 mbar with a 70 °C oil bath and stored in a Schlenk tube. Perfluorobenzene was transferred to a Schlenk tube in glovebox as received. Other solvents were dried and degassed and stored in ©Aldrich Sure/Stor flasks or Schlenk tubes under argon. NaO(*t*-Bu), NaH, and TMEDA were stored in glovebox as received. Other chemicals were used as received. Products were purified by fast chromatography using silica gel 60, 0.063-0.2 mm, 70-230 mesh (Merck). Multiplets of NMR were assigned as s (singlet), d (doublet), t (triplet), q (quartet), p (pentet), dd (doublet of doublets), dt (doublet of triplets), td (triplet of doublets), ddt (doublet of doublet of triplets), dtt (doublet of triplet of triplets), br.s (broad singlet), and m (multiplet).

## 2. Analytical methods

NMRs were recorded on Bruker AV 300, AV 400, and Fourier 300 spectrometers at room temperature. For quantitative <sup>19</sup>F NMR a puls delay of 30s are required. NMR chemical shifts are reported in parts per million (ppm) downfield from TMS. <sup>13</sup>C and <sup>1</sup>H NMR spectra were referenced to signals of deuterio solvents and residual protiated solvents, respectively. EPR spectra were recorded on a Bruker EMX CW-micro spectrometer (X-band) with a microwave power of Ca 6.9 mW and modulation frequency and amplitude of 100 kHz and up to 5 G, respectively. For monitoring the EPR spectra at low temperature, the EPR spectrometer was equipped with a temperature controller and liquid N<sub>2</sub> cryostat. The g values were calculated using  $h\nu = g B_0\beta$  equation being  $h$  = Planck's constant,  $\nu$  = frequency,  $B_0$  = resonance field and  $\beta$  = Bohr magneton. High resolution mass spectra were recorded on a MAT 95XP ThermoFisher Mass Spectrometer using Electrospray Ionization mode. Electron impact (EI) mass spectra were recorded on AMD 402 mass spectrometer (70 eV). The data are given as mass units per charge ( $m/z$ ).

## 3. General procedures

### 3.1 Synthesis of dppfNi(*o*-tol)Cl

dppfNi(*o*-tol)Cl was synthesized using the slightly modified method from a literature.<sup>[1]</sup>

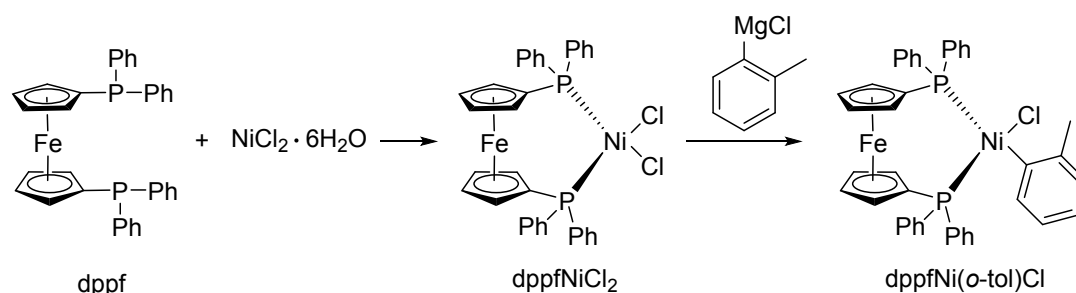

Step 1: NiCl<sub>2</sub>·6H<sub>2</sub>O (8.5 mmol, 2.02 g) and EtOH (25 mL) were placed in an argon flushed 100 mL round Schlenk. Then the septum was removed, and dppf (8.5 mmol, 4.712 g) was added in one portion. The flask was fitted with

## SUPPORTING INFORMATION

a reflux condenser, and the mixture was refluxed for 30 min with an 80 °C oil bath and then cooled to room temperature. Once cool, the flask was chilled to 0 °C with an ice bath for 10 min, after which the solid was collected by vacuum filtration, washed twice with EtOH (20 mL) and twice with ether (20 mL). Drying under vacuum yielded dppfNiCl<sub>2</sub> (4.98 g, 85 %) as a deep green powder.

Step 2: dppfNi(*o*-tol)Cl (6.81 mmol, 4.658 g) and 180 mL CH<sub>2</sub>Cl<sub>2</sub> were placed in an argon flushed 100 mL round Schlenk. The solution was cooled to 0 °C with an ice bath, and *o*-tolylmagnesium chloride (6.81 mmol, 0.945 M in THF, 7.21 mL) was added dropwise with vigorous stirring. Near the end of the addition, the solution began to change in color from green to orange. The solution was stirred for 15 min at 0 °C, after which the solution was evaporated to dryness under reduced pressure. MeOH (25 mL) was added and the mixture was stirred for 5 min to form a suspension. After the suspension was cooled to 0 °C, the solvent was filtered out. The residue was washed with two portions of cold MeOH (10 mL), and dried under high vacuum to yield dppfNi(*o*-tol)Cl (4.63 g, 92 %) as a fine, bright yellow powder.

dppfNi(*o*-tol)Cl: <sup>1</sup>H NMR (400 MHz, CD<sub>2</sub>Cl<sub>2</sub>) δ = 8.23 – 8.12 (m, 4H), 8.02 – 7.93 (m, 2H), 7.51 – 7.38 (m, 7H), 7.27 (td, *J* = 8.3, 2.0 Hz, 2H), 7.21 – 7.15 (m, 1H), 6.99 (t, *J* = 7.4 Hz, 1H), 6.76 (td, *J* = 8.2, 2.6 Hz, 2H), 6.66 – 6.54 (t, 2H), 6.43 (t, *J* = 7.4 Hz, 1H), 6.30 (t, *J* = 6.8 Hz, 1H), 6.10 (d, *J* = 7.1 Hz, 1H), 5.15 (s, 1H), 4.54 (m, 1H), 4.25 (s, 1H), 4.19 (s, 1H), 4.02 (d, *J* = 10.1 Hz, 2H), 3.52 (m, 1H), 3.33 (m, 1H), 2.44 (s, 3H).

<sup>31</sup>P NMR (162 MHz, CD<sub>2</sub>Cl<sub>2</sub>) δ = 29.51 (d, *J* = 25.9 Hz, 1P), 12.12 (d, *J* = 25.9 Hz, 1P).

### 3.2 Synthesis of perfluoroalkylated alkenes

Step 1: *For the reactions of C<sub>10</sub>F<sub>21</sub>I*: 0.2 mmol C<sub>10</sub>F<sub>21</sub>I, 5 mol% dppfNi(*o*-tol)Cl and 2 equiv NaO(*t*-Bu) were placed in an Ace pressure tube. After flushed with argon, 0.5 mL perfluorobenzene and 2 equiv alkene was added. *For the reactions of other perfluoro reagents except CF<sub>3</sub>Br and CF<sub>3</sub>I*: 5 mol% dppfNi(*o*-tol)Cl and 2 equiv NaO(*t*-Bu) were placed in an Ace pressure tube. After flushed with argon, 1 mL perfluorobenzene, 0.5 mmol perfluoro reagent and 2 equiv alkene was added. *For the reactions of CF<sub>3</sub>I*: 5 mol% dppfNi(*o*-tol)Cl and 2 equiv NaO(*t*-Bu) were placed in an Ace pressure tube. After flushed with argon, 2 equiv alkene and 1 mL perfluorobenzene (or DCE) stock solution containing 0.5 mmol CF<sub>3</sub>I were added.

Step 2: Then the tube was sealed and heated for 16 h at specific temperature. After cooling to room temperature, 20 μL 1,4-difluorobenzene and 4 mL heptane or pentane were added to the reaction mixture. Then 250 μL of the solution was taken to measure the conversion and yield by <sup>19</sup>F NMR. Then, the products were isolated by fast chromatography using silica gel 60, 0.063-0.2 mm, 70-230 mesh (Merck) (Heptane or pentane elution).

### 3.3 Synthesis of 3,3-dimethyl-trifluoromethyl butene using CF<sub>3</sub>Br

The reaction was carried out in a Parr Instruments 4560 series 300 mL autoclave containing an alloy plate with wells for five 10 mL glass vials. Under argon atmosphere, 0.5 mmol 3,3-dimethylbutene, 5 mol% dppfNi(*o*-tol)Cl and 2 equiv NaO(*t*-Bu), 1 mL perfluorobenzene and a magnetic stirring bar were placed in the vial, which were then capped with a septum equipped with an inlet needle and flushed with argon. The vial was placed in an alloy plate, which was then placed in the autoclave. Once sealed, the autoclave was purged three times with 15 bar nitrogen and then pressurized with 5 bar CF<sub>3</sub>Br and 40 bar N<sub>2</sub> at room temperature and heated at 50 °C for 16 h. It was then cooled to room temperature and vented to discharge the excess gas. 20 μL 1,4-difluorobenzene and 4 mL pentane were then added to the reaction mixture. And 250 μL of the pentane solution was taken and mixed with

## SUPPORTING INFORMATION

350  $\mu\text{L}$   $\text{CDCl}_3$  to measure the conversion and yield by  $^{19}\text{F}$  NMR.

### 3.4 Synthesis of alkenes

In this project, we synthesized 4 alkenes which are not commercially available using slightly modified procedures from literature.<sup>[2]</sup> The structure of these olefins are shown in Scheme S1. Firstly, the corresponding alcohol (0.5 mmol), NaH (3 equiv) and a magnetic stirring bar were placed in a 100 mL round Schlenk. After flushed with argon, DMF (30 mL) was added. Then the flask was cooled to 0 °C using an ice bath. Once cool, 5-bromopentene was added dropwise using a syringe pump. Thereafter, the reaction could warm slowly to rt and was further stirred overnight. After isolated by fast chromatography using silica gel 60, 0.063-0.2 mm, 70-230 mesh (Merck) (heptane and ethyl acetate elution), the pure products were afforded in 45% to 80% yields.

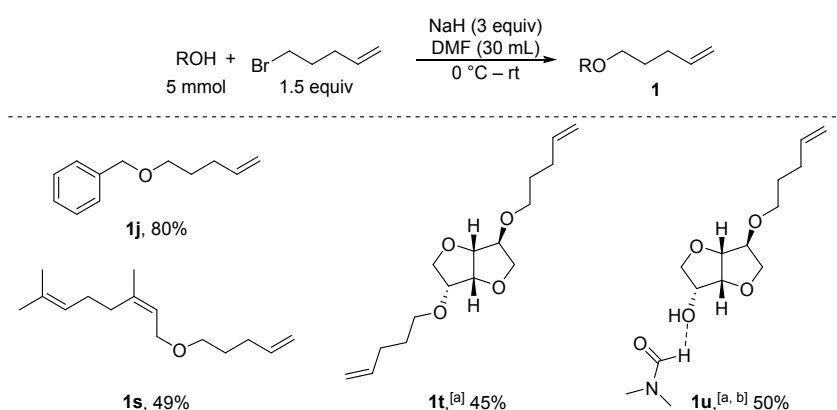

**Scheme S1.** Synthesis of the alkenes. Reactions were performed under Ar, yields were of the isolated products. [a] These two products were obtained by one reaction. [b] As indicated by NMR, The -OH group of the product was supposed to be protected by DMF. It will release -OH group again during the perfluoroalkylation reaction.

## 4. Kinetic time course

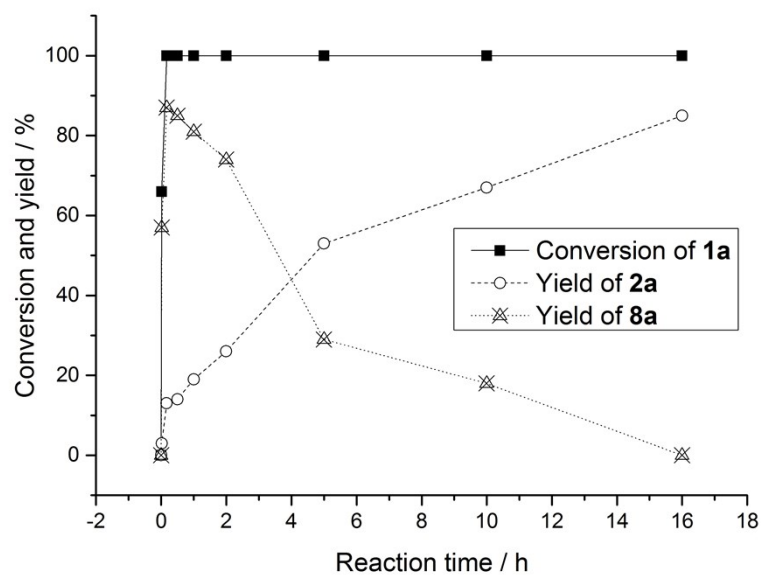

**Figure S1.** Kinetic time course of the nickel-catalyzed perfluoroalkylation of 3,3-dimethylbutene. Reaction conditions:  $C_{10}F_{21}I$  (0.2 mmol), **1a** (0.5 mL),  $dppfNi(o-tol)Cl$  (5 mol%),  $NaO(t-Bu)$  (2 equiv), 50 °C, Ar, conversions and yields were determined by  $^{19}F$  NMR using 1,4-difluorobenzene as the standard. The conversion of **1a** was completed within only 10 mins. There were two inflection points of the yield of **2a**. The first inflection point at 10 mins was caused by the ending of direct perfluoroalkylation. The second inflection point at 5 h was caused by the low concentration of **8a**.

## 5. In situ EPR

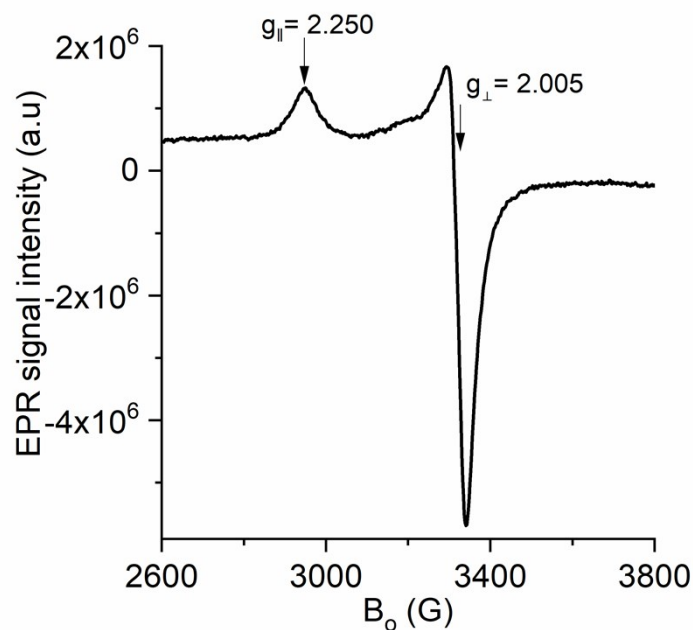

**Figure S2.** EPR spectrum of the reaction mixture **1a** (0.5 mL), dppfNi(o-tol)Cl (5 mol%) and NaO(*t*-Bu) (2 equiv) measured at 100 K under Ar. The spectrum shows an axial EPR signal due to the formation of Ni(I) species (**A**).

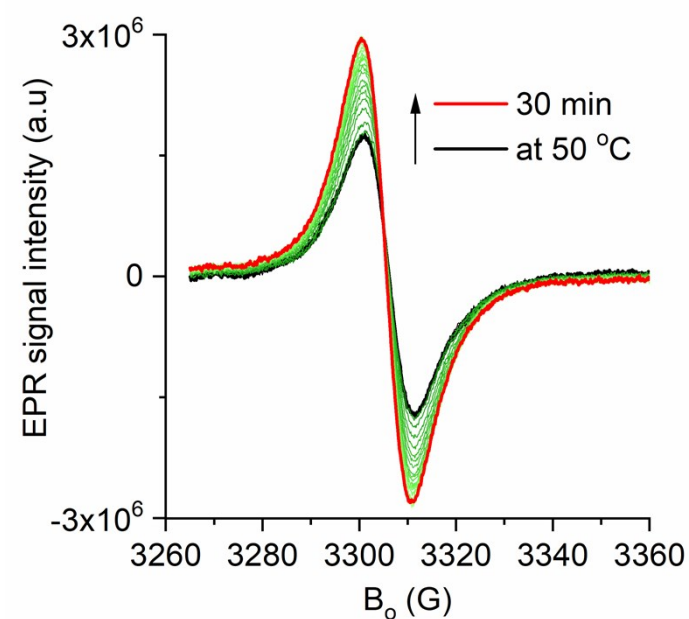

**Figure S3.** In situ EPR spectra with time of the reaction mixture  $C_{10}F_{21}I$  (0.2 mmol), **1a** (0.5 mL), dppfNi(o-tol)Cl (5 mol%) and NaO(*t*-Bu) (2 equiv) measured at 50 °C under Ar. The spectra show EPR signal at  $g = 2.005$  without hyperfine splitting due to the formation of organic radicals (**B** and **C**). The Ni(I) signal is not observable at reaction temperature due to the short relaxation time.<sup>[3]</sup>

## 6. Characterization data

## 6.1 Characterization data of alkenes

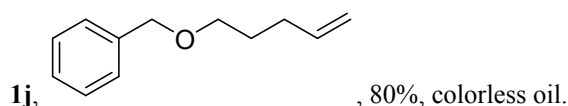

**<sup>1</sup>H NMR (300 MHz, CDCl<sub>3</sub>):**  $\delta$  = 7.38 – 7.03 (m, 5H), 5.74 (ddt,  $J$  = 17.0, 10.2, 6.7 Hz, 1H), 5.06 – 4.74 (m, 2H), 4.41 (s, 2H), 3.40 (t,  $J$  = 6.5 Hz, 2H), 2.20 – 1.94 (m, 2H), 1.75 – 1.43 (m, 2H).

**<sup>13</sup>C NMR (75 MHz, CDCl<sub>3</sub>):**  $\delta$  = 138.57, 138.22, 128.27, 127.54, 127.42, 114.66, 72.82, 69.65, 30.30, 28.92.

**MS (EI, 70 eV):**  $m/z$  (%) = 176.1 (7) [M]<sup>+</sup>, 175.1 (14) [M-H]<sup>+</sup>, 107.1 (13), 91.1 (100), 79.1 (5), 65.1 (9), 55.1 (3).

**TLC (silica gel 60 F<sub>254</sub>):** Ethyl acetate/heptane = 1:10, R<sub>f</sub> = 0.24 (KMnO<sub>4</sub> stain).

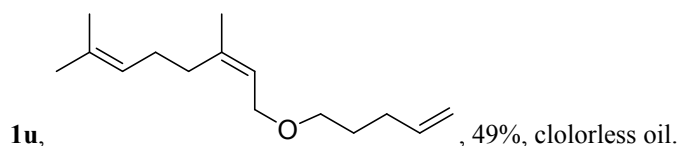

**<sup>1</sup>H NMR (300 MHz, CDCl<sub>3</sub>):**  $\delta$  = 5.89 (ddt,  $J$  = 16.8, 9.9, 6.5 Hz, 1H), 5.43 (t,  $J$  = 6.9 Hz, 1H), 5.25 – 4.94 (m, 3H), 4.01 (d,  $J$  = 6.9 Hz, 2H), 3.49 (t,  $J$  = 6.6 Hz, 2H), 2.26 – 2.07 (m, 6H), 1.87 – 1.64 (m, 9H).

**<sup>13</sup>C NMR (75 MHz, CDCl<sub>3</sub>):**  $\delta$  = 140.04, 138.28, 131.76, 123.86, 122.02, 114.56, 69.50, 66.95, 32.20, 30.34, 28.97, 26.67, 25.62, 23.41, 17.56.

**HRMS (EI):** [M]<sup>+</sup> calcd for C<sub>15</sub>H<sub>26</sub>O<sub>1</sub>, 222.19782; found, 222.19802.

**TLC (silica gel 60 F<sub>254</sub>):** Ethyl acetate/heptane = 1:10, R<sub>f</sub> = 0.67.

**TLC (silica gel 60 F<sub>254</sub>):** Ethyl acetate/heptane = 1:2, R<sub>f</sub> = 0.76.

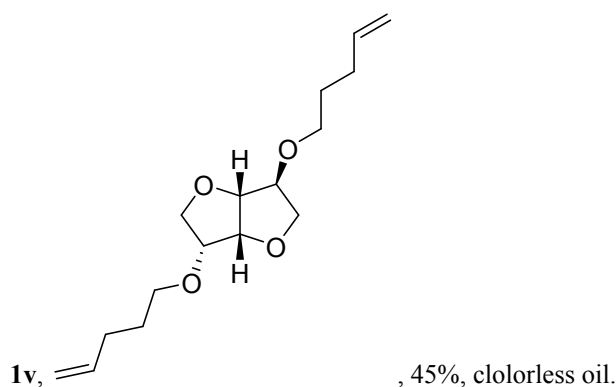

**<sup>1</sup>H NMR (300 MHz, CDCl<sub>3</sub>):**  $\delta$  = 5.91 – 5.61 (m, 2H), 5.11 – 4.83 (m, 4H), 4.66 – 4.39 (m, 2H), 4.05 – 3.79 (m, 5H), 3.74 – 3.35 (m, 5H), 2.10 (m, 4H), 1.78 – 1.51 (m, 4H).

**<sup>13</sup>C NMR (75 MHz, CDCl<sub>3</sub>):**  $\delta$  = 138.03, 137.93, 114.83, 114.72, 86.23, 84.35, 80.32, 80.08, 73.37, 70.02, 69.68, 68.83, 30.09, 30.05, 28.82, 28.74.

**MS (EI, 70 eV):**  $m/z$  (%) = 282.2 (2) [M]<sup>+</sup>, 179.1 (12), 84.1 (42), 69.1 (100).



## SUPPORTING INFORMATION

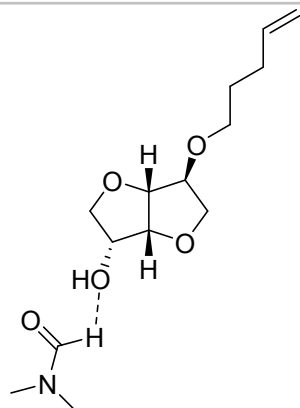

**1w**, 50%, colorless oil.

**<sup>1</sup>H NMR (300 MHz, CDCl<sub>3</sub>):**  $\delta$  = 7.91 (s, 1H), 5.73 (ddt,  $J$  = 14.2, 10.6, 7.0 Hz, 1H), 5.11 – 4.77 (m, 2H), 4.60 (t,  $J$  = 3.5 Hz, 1H), 4.36 (d,  $J$  = 3.1 Hz, 1H), 4.20 (s, 1H), 3.98 – 3.66 (m, 5H), 3.66 – 3.25 (m, 3H), 2.88 (s, 3H), 2.80 (s, 3H), 2.04 (q,  $J$  = 6.9 Hz, 2H), 1.63 (p,  $J$  = 6.9 Hz, 2H).

**<sup>13</sup>C NMR (75 MHz, CDCl<sub>3</sub>):**  $\delta$  = 162.38, 137.78, 114.46, 88.10, 80.16, 79.67, 76.06, 75.65, 69.74, 69.50, 36.25, 31.15, 29.78, 28.54.

**MS (EI, 70 eV):**  $m/z$  (%) = 214.2 (1) [M-DMF]<sup>+</sup>, 159.1 (14), 128.1 (14), 85.1 (24), 84.1 (60), 69.1 (100), 68.1 (73), 67.2 (21).

### 6.2 Characterization data of perfluorodecylated alkenes

Notes: For the <sup>13</sup>C NMR (F coupled), peaks for the C of perfluoroalkyl chain and C adjacent to perfluoroalkyl chain (in most cases) are too broad to be assigned (not shown in the following data).

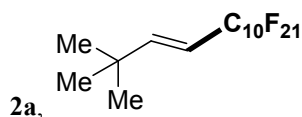

**2a**, colorless oil.

**<sup>1</sup>H NMR (300 MHz, CDCl<sub>3</sub>):**  $\delta$  = 6.39 (dt,  $J$  = 16.0, 2.2 Hz, 1H), 5.48 (dt,  $J$  = 16.0, 12.0 Hz, 1H), 1.08 (s, 9H).

**<sup>19</sup>F NMR (282 MHz, CDCl<sub>3</sub>):**  $\delta$  = -81.03 (t,  $J$  = 10.0 Hz, 3F), -111.31 (q,  $J$  = 12.3 Hz, 2F), -120.65 – -124.69 (14F), -126.33 (br.s 2F).

**TLC (silica gel 60 F<sub>254</sub>):** pentane,  $R_f$  = 0.9, KMnO<sub>4</sub> stain.

**HRMS (EI):** [M]<sup>+</sup> calcd for C<sub>16</sub>H<sub>11</sub>F<sub>21</sub>, 602.05199; found, 602.05119.

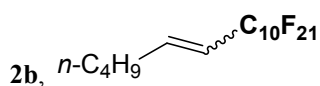

**2b**, *n*-C<sub>4</sub>H<sub>9</sub>, colorless oil, mixture of *E* and *Z* isomers (84:16).

**<sup>1</sup>H NMR (300 MHz, CDCl<sub>3</sub>):**  $\delta$  = 6.52 – 5.99 (m, =CHCF<sub>2</sub>- (*E/Z*), 1H), 5.74 – 5.27 (m, -CH=CHCF<sub>2</sub>- (*E/Z*), 1H), 2.47 – 1.99 (m, -CH<sub>2</sub>-CH= (*E/Z*), 2H), 1.50 – 1.12 (m, -CH<sub>2</sub>-, 4H), 0.92 (t,  $J$  = 7.2 Hz, -CH<sub>3</sub>, 3H).

**<sup>13</sup>C NMR (75 MHz, CDCl<sub>3</sub>):**  $\delta$  = 143.29, 116.76, 77.00, 31.69, 30.07, 22.03, 13.74.

**<sup>19</sup>F NMR (282 MHz, CDCl<sub>3</sub>):**  $\delta$  = -80.80 (t,  $J$  = 10.0 Hz, -CF<sub>3</sub>, 3F), -106.67 (q,  $J$  = 13.7, 13.3 Hz, =CHCF<sub>2</sub>-, *Z*-isomer), -111.22 (q,  $J$  = 11.2, 10.0 Hz, =CHCF<sub>2</sub>-, *E*-isomer), -121.48 (br.s, -CF<sub>2</sub>-, 2F), -121.84 (br.s, -CF<sub>2</sub>-, 8F) - 122.72 (br.s, -CF<sub>2</sub>-, 2F), -123.56 (br.s, =CHCF<sub>2</sub>CF<sub>2</sub>-, *E*-isomer), -123.74 (br.s, =CHCF<sub>2</sub>CF<sub>2</sub>-, *Z*-isomer), -126.14 (br.s, -CF<sub>2</sub>-, 2F).

## SUPPORTING INFORMATION

**HRMS (EI):** [M]<sup>+</sup> calcd for C<sub>16</sub>H<sub>11</sub>F<sub>21</sub>, 602.05199; found, 602.05121.

**2c**, 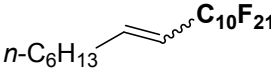, yellow sticky oil, mixture of *E* and *Z* isomers (87:13).

**<sup>1</sup>H NMR (300 MHz, CDCl<sub>3</sub>):** δ = 6.58 – 5.98 (m, =CHCF<sub>2</sub>- (*E/Z*), 1H), 5.74 – 5.26 (m, -CH=CHCF<sub>2</sub>- (*E/Z*), 1H), 2.41 – 2.08 (m, -CH<sub>2</sub>-CH= (*E/Z*), 2H), 1.44 (m, -CH<sub>2</sub>-, 2H), 1.29 (br.s, -CH<sub>2</sub>-, 6H), 0.89 (t, *J* = 6.9 Hz, -CH<sub>3</sub>, 3H).

**<sup>13</sup>C NMR (75 MHz, CDCl<sub>3</sub>):** δ = 143.22 (t, *J* = 9.1 Hz, =CHCF<sub>2</sub>-), 116.74 (t, *J* = 22.9 Hz, -CH=CHCF<sub>2</sub>-), 76.94, 31.96, 31.48, 28.58, 27.90, 22.46, 13.84.

**<sup>19</sup>F NMR (282 MHz, CDCl<sub>3</sub>):** δ = -81.16 (t, *J* = 9.9 Hz, -CF<sub>3</sub>, 3F), -106.86 (q, *J* = 13.2 Hz, =CHCF<sub>2</sub>-, *Z*-isomer), -111.46 (q, *J* = 11.7, 12.8 Hz, =CHCF<sub>2</sub>-, *E*-isomer), -121.65 (br.s, -CF<sub>2</sub>-, 2F), -122.05 (br.s, -CF<sub>2</sub>-, 8F), -122.96 (br.s, -CF<sub>2</sub>-, 2F), -123.77 (br.s, =CHCF<sub>2</sub>CF<sub>2</sub>-, *E*-isomer), -123.94 (br.s, =CHCF<sub>2</sub>CF<sub>2</sub>-, *Z*-isomer), -126.41 (br.s, -CF<sub>2</sub>-, 2F).

**HRMS (EI):** [M]<sup>+</sup> calcd for C<sub>18</sub>H<sub>15</sub>F<sub>21</sub>, 630.08329; found, 630.08205.

**2d**, 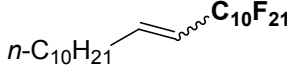, colorless oil, mixture of *E* and *Z* isomers (88:12).

**<sup>1</sup>H NMR (300 MHz, CDCl<sub>3</sub>):** δ = 6.55 – 6.04 (m, =CHCF<sub>2</sub>- (*E/Z*), 1H), 5.94 – 5.34 (m, -CH=CHCF<sub>2</sub>- (*E/Z*), 1H), 2.50 – 2.09 (m, -CH<sub>2</sub>-CH= (*E/Z*), 2H), 1.56 – 1.38 (m, -CH<sub>2</sub>-, 2H), 1.28 (br.s, -CH<sub>2</sub>-, 14H), 0.96 – 0.74 (t, *J* = 6.9 Hz, -CH<sub>3</sub>, 3H).

**<sup>13</sup>C NMR (75 MHz, CDCl<sub>3</sub>):** δ = 143.27 (t, *J* = 9.0 Hz, =CHCF<sub>2</sub>-), 116.94 (t, *J* = 23.0 Hz, -CH=CHCF<sub>2</sub>-), 32.07, 32.00, 29.67, 29.61, 29.42, 29.06, 28.08, 22.74, 13.98.

**<sup>19</sup>F NMR (282 MHz, CDCl<sub>3</sub>):** δ = -81.31 (t, *J* = 10.0 Hz, -CF<sub>3</sub>, 3F), -106.94 (q, *J* = 13.5 Hz, =CHCF<sub>2</sub>-, *Z*-isomer), -111.56 (q, *J* = 11.4, 10.4 Hz, =CHCF<sub>2</sub>-, *E*-isomer), -121.71 (br.s, -CF<sub>2</sub>-, 2F), -122.12 (br.s, -CF<sub>2</sub>-, 8F), -123.04 (br.s, -CF<sub>2</sub>-, 2F), -123.82 (br.s, =CHCF<sub>2</sub>CF<sub>2</sub>-, *E*-isomer), -124.01 (br.s, =CHCF<sub>2</sub>CF<sub>2</sub>-, *Z*-isomer), -126.52 (br.s, -CF<sub>2</sub>-, 2F).

**MS (EI, 70 eV):** *m/z* (%) = 131.1 (17), 111.2 (31), 98.1 (30), 97.1 (61), 85.1 (46), 84.1 (61), 83.1 (58), 71.1 (64), 70.1 (91), 69.1 (95), 57.1 (100), 56.1 (92), 55.1 (64).

**HRMS (EI):** [M]<sup>+</sup> calcd for C<sub>22</sub>H<sub>23</sub>F<sub>21</sub>, 686.14589; found, 686.14522.

**2e**, 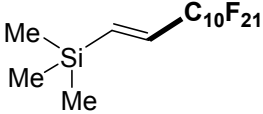, light yellow oil.

**<sup>1</sup>H NMR (300 MHz, CDCl<sub>3</sub>):** δ = 6.57 (dt, *J* = 19.0, 2.3 Hz, =CHCF<sub>2</sub>-, 1H), 5.87 (dt, *J* = 19.1, 11.0 Hz, -CH=CHCF<sub>2</sub>-, 1H), 0.00 (s, -CH<sub>3</sub>, 9H).

**<sup>13</sup>C NMR (75 MHz, CDCl<sub>3</sub>):** δ = 145.99 (t, *J* = 5.9 Hz, -C=CHCF<sub>2</sub>-), 132.04 (t, *J* = 24.1 Hz, -C=CHCF<sub>2</sub>-), 0.00.

**<sup>19</sup>F NMR (282 MHz, CDCl<sub>3</sub>):** δ = -81.12 (CF<sub>3</sub>, 3F), -113.43 (q, *J* = 11.6, 11.2 Hz, alkenyl- CF<sub>2</sub>, 2F), -120.90 – -124.77 (m, 14F), -126.40 (br.s, 2F). -81.12 (t, *J* = 9.9 Hz, -CF<sub>3</sub>, 3F), -113.43 (q, *J* = 11.6, 11.2 Hz, =CHCF<sub>2</sub>-, 2F), -121.64 (br.s, -CF<sub>2</sub>-, 2F), -122.03 (br.s, -CF<sub>2</sub>-, 8F), -122.94 (br.s, -CF<sub>2</sub>-, 2F), -123.67 (br.s, =CHCF<sub>2</sub>CF<sub>2</sub>-, 2F), -126.40 (br.s, -CF<sub>2</sub>-, 2F).

**MS (EI, 70 eV):** *m/z* (%) = 603.1 (27) [M-Me]<sup>+</sup>, 214.1 (4), 184.1 (10), 153.1 (77), 131.0 (27), 103.1 (17), 77.1 (100), 53.1 (15).

## SUPPORTING INFORMATION

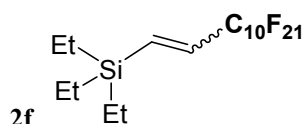

2f, colorless oil, mixture of *E* and *Z* isomers (84:16).

**<sup>1</sup>H NMR (300 MHz, CDCl<sub>3</sub>):** δ = 6.67 (dt, *J* = 19.2, 2.3 Hz, =CHCF<sub>2</sub>- (*E*), 0.8H), 6.49 – 6.28 (m, -CH=CHCF<sub>2</sub>- (*Z*), 0.4H), 6.05 (dt, *J* = 19.2, 10.9 Hz, -CH=CCF<sub>2</sub>- (*E*), 0.8H), 0.96 (t, *J* = 7.9 Hz, -CH<sub>3</sub>, 9H), 0.66 (q, *J* = 8.4 Hz, -CH<sub>2</sub>-, 6H).

**<sup>19</sup>F NMR (282 MHz, CDCl<sub>3</sub>):** δ = -80.98 (t, *J* = 10.0 Hz, -CF<sub>3</sub>, 3F), -110.46 (q, *J* = 12.1 Hz, alkenyl- CF<sub>2</sub> (*Z*), 0.4F), -113.29 (q, *J* = 11.4, alkenyl- CF<sub>2</sub> (*E*), 1.6F), -121.22 – -123.80 (14F), -126.26 (br.s, 2F).

**MS (EI, 70 eV):** *m/z* (%) = 631.2 (100) [M-Et]<sup>+</sup>, 169.0 (19), 167.1 (19), 131.0 (23), 119.0 (26), 105.1 (49), 95.1 (33), 77.1 (22), 69.1 (27).

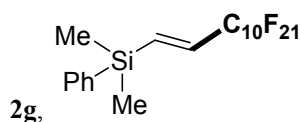

2g, colorless oil.

**<sup>1</sup>H NMR (300 MHz, CDCl<sub>3</sub>):** δ = 7.52 – 7.46 (m, -Ph, 2H), 7.43 – 7.35 (m, -Ph, 3H), 6.85 (dt, *J* = 19.0, 2.3 Hz, =CHCF<sub>2</sub>-, 1H), 6.07 (dt, *J* = 19.0, 10.9 Hz, -CH=CCF<sub>2</sub>-, 1H), 0.44 (s, -CH<sub>3</sub>, 6H).

**<sup>13</sup>C NMR (75 MHz, CDCl<sub>3</sub>):** δ = 142.05 (t, *J* = 5.6 Hz, -C=CHCF<sub>2</sub>-), 135.73, 133.77, 131.30 (t, *J* = 24.0 Hz, -C=CHCF<sub>2</sub>-), 129.72, 128.09, -3.32.

**<sup>19</sup>F NMR (282 MHz, CDCl<sub>3</sub>):** δ = -80.83 (t, *J* = 10.0 Hz, -CF<sub>3</sub>, 3F), -113.24 (q, *J* = 12.0 Hz, =CHCF<sub>2</sub>-, 2F), -121.44 (br.s, -CF<sub>2</sub>-, 2F), -121.84 (br.s, -CF<sub>2</sub>-, 10F), -122.73 (br.s, -CF<sub>2</sub>-, 2F), -123.39 (br.s, -CF<sub>2</sub>-, 2F), -126.17 (br.s, -CF<sub>2</sub>-, 2F).

**MS (EI, 70 eV):** *m/z* (%) = 665.1 (29) [M-Me]<sup>+</sup>, 584.1 (22), 215.1 (51), 165.1 (100), 139.0 (49), 135.1 (25), 115.1 (24), 77.1 (64).

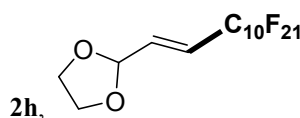

2h, colorless sticky oil.

**<sup>1</sup>H NMR (300 MHz, CDCl<sub>3</sub>):** δ = 6.37 (ddt, *J* = 15.8, 4.2, 2.1 Hz, 1H), 6.05 (dt, *J* = 16.1, 12.1 Hz, 1H), 5.47 (m, 1H), 4.08 – 3.84 (m, 4H).

**<sup>13</sup>C NMR (75 MHz, CDCl<sub>3</sub>):** δ = 137.94, 120.45, 100.57, 65.11.

**<sup>19</sup>F NMR (282 MHz, CDCl<sub>3</sub>):** δ = -80.79 (t, *J* = 10.0 Hz, 3F), -112.52 (q, *J* = 12.1 Hz, alkenyl- CF<sub>2</sub>, 2F), -120.13 – -124.31 (m, 14F), -126.12 (2F).

**HRMS (EI):** [M-H]<sup>+</sup> calcd for C<sub>15</sub>H<sub>6</sub>O<sub>2</sub>F<sub>21</sub>, 617.00270; found, 616.99916.

**TLC (silica gel 60 F<sub>254</sub>):** Ethyl acetate/heptane = 1:10, R<sub>f</sub> = 0.49 (KMnO<sub>4</sub> stain).

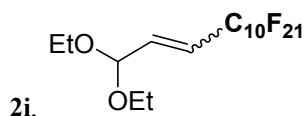

2i, colorless oil, mixture of *E* and *Z* isomers (87:13).

**<sup>1</sup>H NMR (300 MHz, CDCl<sub>3</sub>):** δ = 6.39 – 6.32 (m, =CHCF<sub>2</sub>- (*E*)), 6.20 – 6.12 (m, =CHCF<sub>2</sub>- (*Z*)), 6.12 – 5.90 (m, -CH=CHCF<sub>2</sub>- (*E*)), 5.78 – 5.55 (m, -CH=CHCF<sub>2</sub>- (*Z*)), 5.33 – 5.25 (m, -CH(OEt)<sub>2</sub> (*Z*)), 5.11 – 5.02 (m, -CH(OEt)<sub>2</sub>

## SUPPORTING INFORMATION

(*E*)), 3.76 – 3.44 (m,  $-CH_2-$ , 4H), 1.22 (t,  $J = 7.1$  Hz,  $-CH_3$ , 6H).

$^{13}\text{C}$  NMR (75 MHz,  $\text{CDCl}_3$ ):  $\delta = 139.28$  (t,  $J = 8.7$  Hz,  $-C=CHCF_2-$ ), 120.24 (t,  $J = 23.5$  Hz,  $-C=CHCF_2-$ ), 98.15, 77.00, 61.16, 15.06.

$^{19}\text{F}$  NMR (282 MHz,  $\text{CDCl}_3$ ):  $\delta = -81.02$  (t,  $J = 10.0$  Hz,  $CF_3$ , 3F),  $-106.89$  (q,  $J = 13.7, 13.1$  Hz,  $=CHCF_2-$  (*Z*)),  $-112.41$  (q,  $J = 12.4$  Hz,  $=CHCF_2-$  (*E*)),  $-121.59$  (br.s,  $-CF_2-$ , 2F),  $-121.96$  (br.s,  $-CF_2-$ , 10F),  $-122.87$  (br.s,  $-CF_2-$ , 2F),  $-123.46$  (br.s,  $-CF_2-$ , 2F),  $-126.31$  (br.s,  $-CF_2-$ , 2F).

MS (EI, 70 eV):  $m/z$  (%) = 603.1 (48)  $[\text{M}-\text{EtO}]^+$ , 575.1 (100), 238.1 (5), 218.9 (8), 169.0 (24), 131.1 (47), 106.1 (66), 69.0 (54).

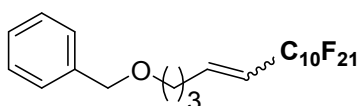

2j, colorless oil, mixture of *E* and *Z* isomers (82:18).

$^1\text{H}$  NMR (300 MHz,  $\text{CDCl}_3$ ):  $\delta = 7.37 - 7.28$  (m, -Ph, 5H), 6.49 – 5.41 (m,  $-CH=CHCF_2-$ , *E/Z*, 2H), 4.52 (s,  $\text{Ph}-CH_2-$ , 2H), 3.54 – 3.49 (t,  $J = 6.2$  Hz,  $-OCH_2CH_2-$ , 2H), 2.45 – 2.30 (m,  $-CH_2-$ , 2H), 1.83 – 1.64 (m,  $-CH_2-$ , 2H).

$^{19}\text{F}$  NMR (282 MHz,  $\text{CDCl}_3$ ):  $\delta = -80.98$  (t,  $J = 10.0$  Hz,  $-CF_3$ , 3F),  $-106.81$  (q,  $J = 13.5$  Hz,  $=CHCF_2-$  (*Z*)),  $-111.39$  (q,  $J = 11.5, 10.5$  Hz,  $=CHCF_2-$  (*E*)),  $-121.53$  (br.s,  $-CF_2-$ , 2F),  $-121.92$  (br.s,  $-CF_2-$ , 8F),  $-122.82$  (br.s,  $-CF_2-$ , 2F),  $-123.57$  and  $-123.78$  (br.s,  $=CHCF_2CF_2-$  (*E/Z*), 2F),  $-126.27$  (br.s,  $-CF_2-$ , 2F).

HRMS (EI):  $[\text{M}]^+$  calcd for  $\text{C}_{22}\text{H}_{15}\text{O}_1\text{F}_{21}$ , 694.07821; found, 694.07752.

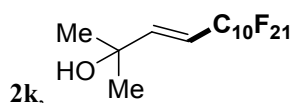

2k, colorless oil.

$^1\text{H}$  NMR (300 MHz,  $\text{CDCl}_3$ ):  $\delta = 6.71 - 6.41$  (m,  $=CHCF_2-$ , 1H), 5.87 (dt,  $J = 15.4, 11.5$  Hz,  $-CH=CHCF_2-$ , 1H), 1.54 (s,  $-\text{OH}$ ), 1.51 (s,  $-CH_3$ , 6H).

$^{19}\text{F}$  NMR (282 MHz,  $\text{CDCl}_3$ ):  $\delta = -80.87$  (t,  $J = 10.0$  Hz,  $-CF_3$ , 3F),  $-111.49$  (q,  $J = 12.2$  Hz,  $=CHCF_2-$ , 2F),  $-121.44$  (br.s,  $-CF_2-$ , 2F),  $-121.87$  (br.s,  $-CF_2-$ , 8F),  $-122.76$  (br.s,  $-CF_2-$ , 2F),  $-123.56$  (br.s,  $-CF_2-$ , 2F),  $-126.19$  (br.s,  $-CF_2-$ , 2F).

HRMS (EI):  $[\text{M}-\text{Me}]^+$  calcd for  $\text{C}_{14}\text{H}_6\text{O}_1\text{F}_{21}$ , 589.00778; found, 589.00799.

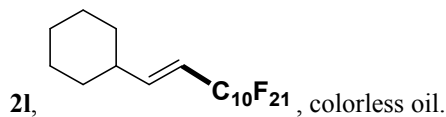

2l, colorless oil.

$^1\text{H}$  NMR (300 MHz,  $\text{CDCl}_3$ ):  $\delta = 6.35$  (ddt,  $J = 15.9, 6.7, 2.2$  Hz,  $=CHCF_2-$ , 1H), 5.72 – 5.22 (m,  $-CH=CHCF_2-$ , 1H), 2.20 – 2.04 (m, 1H), 1.79 – 1.65 (m, 4H), 1.37 – 1.08 (m, 6H).

$^{13}\text{C}$  NMR (75 MHz,  $\text{CDCl}_3$ ):  $\delta = 148.16$  (t,  $J = 8.8$  Hz,  $-C=CHCF_2-$ ), 114.64 (t,  $J = 23.0$  Hz,  $-C=CHCF_2-$ ), 40.22, 31.69, 25.87, 25.65.

$^{19}\text{F}$  NMR (282 MHz,  $\text{CDCl}_3$ ):  $\delta = -81.08$  (t,  $J = 10.0$  Hz,  $-CF_3$ , 3F),  $-111.42$  (q,  $J = 12.1$  Hz,  $=CHCF_2-$ , 2F),  $-121.55$  (br.s,  $-CF_2-$ , 2F),  $-122.01$  (br.s,  $-CF_2-$ , 8F),  $-122.91$  (br.s,  $-CF_2-$ , 2F),  $-123.78$  (br.s,  $=CHCF_2CF_2-$ , 2F),  $-126.37$  (br.s,  $-CF_2-$ , 2F).

MS (EI, 70 eV):  $m/z$  (%) = 628.1 (9)  $[\text{M}]^+$ , 609.1 (15), 589.1 (1), 567.1 (9), 169.0 (6), 131.0 (8), 103.1 (14), 82.1 (100), 81.1 (32), 69.1 (25), 67.1 (52).

## SUPPORTING INFORMATION

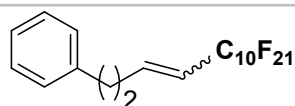

**2m**, colorless oil, mixture of *E* and *Z* isomers (83:17).

**<sup>1</sup>H NMR (300 MHz, CDCl<sub>3</sub>):** δ = 7.64 – 6.84 (m, -Ph, 5H), 6.70 – 6.39 (m, =CHCF<sub>2</sub>- (*E*)), 6.21 – 6.03 (m, =CHCF<sub>2</sub>- (*Z*)), 5.99 – 5.82 (m, -CH=CHCF<sub>2</sub>- (*Z*)), 5.69 – 5.33 (m, -CH=CHCF<sub>2</sub>- (*E*)), 2.81 – 2.74 (m, PhCH<sub>2</sub>-, 2H), 2.72 – 2.64 (m, -CH<sub>2</sub>CH= (*Z*)), 2.57 – 2.43 (m, -CH<sub>2</sub>CH= (*E*)).

**<sup>13</sup>C NMR (75 MHz, CDCl<sub>3</sub>):** δ = 142.07 (t, *J* = 8.9 Hz, -C=CHCF<sub>2</sub>-), 140.36, 128.52, 128.35, 126.29, 117.62 (t, *J* = 22.9 Hz, -C=CHCF<sub>2</sub>-), 34.40, 33.74.

**<sup>19</sup>F NMR (282 MHz, CDCl<sub>3</sub>):** δ = -80.98 (t, *J* = 10.0 Hz, -CF<sub>3</sub>, 3F), -106.98 (q, *J* = 13.3 Hz, =CHCF<sub>2</sub>- (*Z*)), -111.47 (q, *J* = 11.5, 10.6 Hz, =CHCF<sub>2</sub>- (*E*)), -121.55 (br.s, -CF<sub>2</sub>-, 2F), -121.94 (br.s, -CF<sub>2</sub>-, 8F), -122.84 (br.s, -CF<sub>2</sub>-, 2F), -123.61 and -123.83 (br.s, =CHCF<sub>2</sub>CF<sub>2</sub>- (*E/Z*), 2F), -126.27 (br.s, -CF<sub>2</sub>-, 2F).

**HRMS (EI):** [M]<sup>+</sup> calcd for C<sub>20</sub>H<sub>11</sub>F<sub>21</sub>, 650.05199; found, 650.05178.

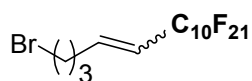

**2n**, colorless oil, mixture of *E* and *Z* isomers (78:22).

**<sup>1</sup>H NMR (300 MHz, CDCl<sub>3</sub>):** δ = 6.37 (dtt, *J* = 16.2, 7.1, 2.3 Hz, =CHCF<sub>2</sub>- (*E*)), 6.15 – 6.05 (m, =CHCF<sub>2</sub>- (*Z*)), 5.76 – 5.50 (m, -CH=CHCF<sub>2</sub>- (*E/Z*), 1H), 3.19 (t, *J* = 6.7 Hz, BrCH<sub>2</sub>-, 2H), 2.49 – 2.31 (m, -CH<sub>2</sub>CH= (*E/Z*), 2H), 1.98 (p, *J* = 6.8 Hz, BrCH<sub>2</sub>CH<sub>2</sub>-, 2H).

**<sup>19</sup>F NMR (282 MHz, CDCl<sub>3</sub>):** δ = -80.74 (t, *J* = 10.0 Hz, -CF<sub>3</sub>, 3F), -106.79 (q, *J* = 13.1 Hz, =CHCF<sub>2</sub>- (*Z*)), -111.44 (q, *J* = 11.9, 11.2 Hz, =CHCF<sub>2</sub>- (*E*)), -121.40 (br.s, -CF<sub>2</sub>-, 2F), -121.78 (br.s, -CF<sub>2</sub>-, 8F), -122.68 (br.s, -CF<sub>2</sub>-, 2F), -123.39 and -123.63 (br.s, =CHCF<sub>2</sub>CF<sub>2</sub>- (*E/Z*), 2F), -126.09 (br.s, -CF<sub>2</sub>-, 2F).

**MS (EI, 70 eV):** *m/z* (%) = 631.2 (100), 169.0 (19), 167.1 (19), 131.0 (23), 119.0 (26), 105.1 (49), 95.1 (33), 77.1 (22), 69.1 (27).

**TLC (silica gel 60 F<sub>254</sub>):** Ethyl acetate/heptane = 1:10, R<sub>f</sub> = 0.71.

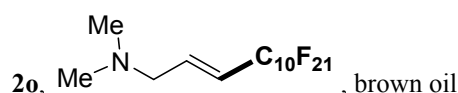

**2o**, brown oil

**<sup>1</sup>H NMR (300 MHz, CDCl<sub>3</sub>):** δ = 6.38 – 6.47 (m, =CHCF<sub>2</sub>-, 1H), 5.88 – 5.74 (m, -CH=CHCF<sub>2</sub>-, 1H), 3.06 (s, -CH<sub>2</sub>-, 2H), 2.24 (s, -Me, 6H).

**<sup>13</sup>C NMR (75 MHz, CDCl<sub>3</sub>):** δ = 140.17 (t, *J* = 8.9 Hz, -C=CHCF<sub>2</sub>-), 118.89 (t, *J* = 23.3 Hz, C=CHCF<sub>2</sub>-), 60.11, 45.23.

**<sup>19</sup>F NMR (282 MHz, CDCl<sub>3</sub>):** δ = -80.97 (t, *J* = 10.0 Hz, -CF<sub>3</sub>, 3F), -111.75 (q, *J* = 11.1, 10.2 Hz, =CHCF<sub>2</sub>-, 2F), -121.57 (br.s, -CF<sub>2</sub>-, 2F), -121.94 (br.s, -CF<sub>2</sub>-, 8F), -122.84 (br.s, -CF<sub>2</sub>-, 2F), -123.58 (br.s, =CHCF<sub>2</sub>CF<sub>2</sub>-, 2F), -126.28 (br.s, -CF<sub>2</sub>-, 2F).

**MS (EI, 70 eV):** *m/z* (%) = 603.1 (56) [M]<sup>+</sup>, 602.1 (66) [M-H]<sup>+</sup>, 584.1 (100), 484.1 (1), 355.1 (1), 284.1 (1), 134.1 (23), 84.1 (24), 58.1 (44).

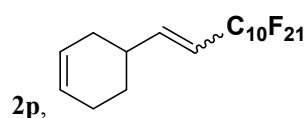

**2p**, colorless oil, mixture of *E* and *Z* isomers (89:11).

## SUPPORTING INFORMATION

**<sup>1</sup>H NMR (300 MHz, CDCl<sub>3</sub>):** δ = 6.42 (ddt, *J* = 15.9, 7.0, 2.2 Hz, =CHCF<sub>2</sub>- (*E*)), 5.83 – 5.53 (m, -CH=CHCF<sub>2</sub>- (*E*) and -CH<sub>2</sub>CH=CHCH<sub>2</sub>-), 5.15 – 4.97 (m, =CHCF<sub>2</sub>- (*Z*) and -CH=CHCF<sub>2</sub>- (*Z*)), 2.50 – 2.40 (m, 1H), 2.22 – 2.04 (m, 3H), 1.97 – 1.79 (m, 2H), 1.51 – 1.41 (m, 1H).

**<sup>13</sup>C NMR (75 MHz, CDCl<sub>3</sub>):** δ = 147.19 (t, *J* = 8.7 Hz, -C=CHCF<sub>2</sub>-), 127.04, 125.02, 115.39 (t, *J* = 22.9 Hz, -C=CHCF<sub>2</sub>-), 36.21, 30.07, 27.47, 24.28.

**<sup>19</sup>F NMR (282 MHz, CDCl<sub>3</sub>):** δ = -81.03 (t, *J* = 10.0 Hz, -CF<sub>3</sub>, 3F), -109.61 (br.s, =CHCF<sub>2</sub>- (*Z*)), -111.44 (q, *J* = 12.0 Hz, =CHCF<sub>2</sub>- (*E*)), -121.52 (br.s, -CF<sub>2</sub>-, 2F), -121.97 (br.s, -CF<sub>2</sub>-, 8F), -122.88 (br.s, -CF<sub>2</sub>-, 2F), -123.70 (br.s, =CHCF<sub>2</sub>CF<sub>2</sub>-, 2F), -126.31 (br.s, -CF<sub>2</sub>-, 2F).

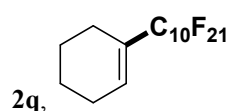

**<sup>1</sup>H NMR (300 MHz, CDCl<sub>3</sub>):** δ = 6.26 (tt, *J* = 3.9, 1.7 Hz, 1H), 2.15 – 2.02 (m, 4H), 1.66 – 1.53 (m, 4H).

**<sup>19</sup>F NMR (282 MHz, CDCl<sub>3</sub>):** δ = -80.80 (t, *J* = 9.9 Hz, 3F), -113.42 (s, alkenyl- CF<sub>2</sub>-, 2F), -121.92 (12F), -122.73 (br.s, 2F), -126.14 (br.s, 2F).

**HRMS (EI):** [M-H]<sup>+</sup> calcd for C<sub>16</sub>H<sub>8</sub>F<sub>21</sub>, 599.02852; found, 599.02776.

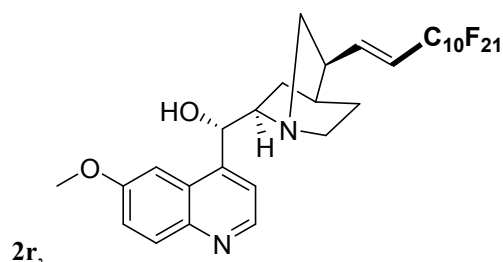

, light brown sticky oil, mixture of *E* and *Z* isomers (81:19).

**<sup>1</sup>H NMR (300 MHz, CDCl<sub>3</sub>):** δ = 8.73 (d, *J* = 4.5 Hz, -ArH, 1H), 8.01 (d, *J* = 9.2 Hz, -ArH, 1H), 7.51 – 7.32 (m, -ArH, 2H), 7.25 (s, -ArH, 1H), 6.73 – 6.51 (m, =CHCF<sub>2</sub>- (*E* and *Z*), 1H), 6.31 (br.s, -OH, 1H), 6.13 – 5.56 (m, -CH=CHCF<sub>2</sub>- (*E* and *Z*), 1H), 3.93 (s, -OCH<sub>3</sub>, 3H), 3.45 (s, 1H), 3.33 (m, 1H), 3.06 (m, 2H), 2.82 (m, 2H), 2.57 – 2.12 (m, 2H), 2.04 – 1.83 (m, 1H), 1.58 (d, *J* = 9.3 Hz, 3H).

**<sup>13</sup>C NMR (75 MHz, CDCl<sub>3</sub>):** (only the signals of *E* isomer are shown) δ = 158.28, 147.31, 144.67, 141.73, 132.01, 126.73, 122.04, 100.41, 60.16, 55.51, 50.44, 49.92, 49.81, 48.92, 38.46, 27.36, 25.91.

**<sup>19</sup>F NMR (282 MHz, CDCl<sub>3</sub>):** δ = -80.95 (t, *J* = 10.0 Hz, -CF<sub>3</sub>, 3F), -106.21 (q, *J* = 11.1, 10.2 Hz, =CHCF<sub>2</sub>- (*Z*)), -111.37 (q, *J* = 11.5, 10.9 Hz, =CHCF<sub>2</sub>- (*E*)), -121.45 (br.s, -CF<sub>2</sub>-, 2F), -121.93 (br.s, -CF<sub>2</sub>-, 8F), -122.82 (br.s, -CF<sub>2</sub>-, 2F), -123.48 (br.s, =CHCF<sub>2</sub>CF<sub>2</sub>-, (*E*)), -123.75 (br.s, =CHCF<sub>2</sub>CF<sub>2</sub>-, (*Z*)), -126.25 (br.s, -CF<sub>2</sub>-, 2F).

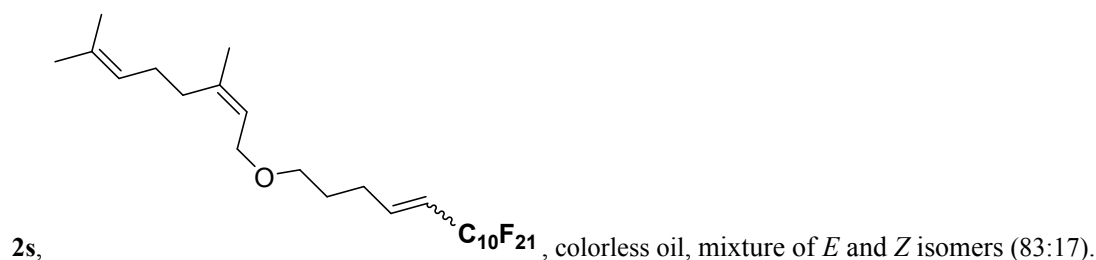

**<sup>1</sup>H NMR (300 MHz, CDCl<sub>3</sub>):** δ = 6.58 – 6.01 (m, 1H), 5.93 – 5.48 (m, 1H), 5.34 (m, 1H), 5.17 – 4.99 (m, 1H), 3.94 (d, *J* = 7.5 Hz, 2H), 3.42 (t, *J* = 6.2 Hz, 2H), 2.46 – 2.20 (m, 2H), 2.08 (m, 2H), 1.75 (s, 3H), 1.67 (s, 3H),

## SUPPORTING INFORMATION

1.60 (s, 3H), 1.42 – 0.99 (m, 4H).

**<sup>19</sup>F NMR (282 MHz, CDCl<sub>3</sub>):**  $\delta$  = -80.87 (t,  $J$  = 10.0 Hz, 3F), -106.77 (q,  $J$  = 13.3 Hz, alkenyl- CF<sub>2</sub> (Z), 0.3F), -111.34 (q,  $J$  = 11.5, 10.7 Hz, alkenyl- CF<sub>2</sub> (E), 1.7F), -121.50 – -123.53 (14F), -126.20 (br.s, 2F).

**HRMS (EI):** [M]<sup>+</sup> calcd for C<sub>25</sub>H<sub>25</sub>O<sub>1</sub>F<sub>21</sub>, 740.15646; found, 740.15590.

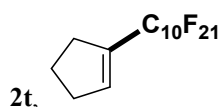

**<sup>19</sup>F NMR (282 MHz, CDCl<sub>3</sub>):**  $\delta$  = -80.93 (t,  $J$  = 9.9 Hz, 3F), -110.27 (br.s, alkenyl- CF<sub>2</sub>-, 2F), -120.93 (br.s, -CF<sub>2</sub>-, 2F), -121.87 (br.s, -CF<sub>2</sub>-, 8F), -122.35 (br.s, -CF<sub>2</sub>-, 2F), -122.82 (br.s, =CHCF<sub>2</sub>CF<sub>2</sub>-, 2F), -126.25 (br.s, -CF<sub>2</sub>-, 2F).

### 6.3 Characterization data of other perfluoroalkylated alkenes

Notes: For the <sup>13</sup>C NMR (F coupled), peaks for the C of perfluoroalkyl chain and C adjacent to perfluoroalkyl chain (in most cases) are too broad to be assigned (not shown in the following data).

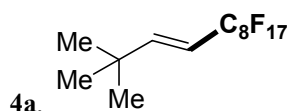

**<sup>1</sup>H NMR (300 MHz, CDCl<sub>3</sub>):**  $\delta$  = 6.40 (dt,  $J$  = 16.0, 2.2 Hz, =CHCF<sub>2</sub>-, 1H), 5.49 (dt,  $J$  = 16.0, 11.9 Hz, -CH=CHCF<sub>2</sub>-, 1H), 1.08 (s, -CH<sub>3</sub>, 9H).

**<sup>13</sup>C NMR (75 MHz, CDCl<sub>3</sub>):**  $\delta$  = 152.93 (t,  $J$  = 8.3 Hz, -C=CHCF<sub>2</sub>-), 112.47 (t,  $J$  = 23.0 Hz, -C=CHCF<sub>2</sub>-), 33.46, 28.34.

**<sup>19</sup>F NMR (282 MHz, CDCl<sub>3</sub>):**  $\delta$  = -81.18 (t,  $J$  = 10.1 Hz, -CF<sub>3</sub>, 3F), -111.41 (q,  $J$  = 12.2 Hz, =CHCF<sub>2</sub>-, 2F), -121.61 (br.s, -CF<sub>2</sub>-, 2F), -122.18 (m, -CF<sub>2</sub>-, 4F), -122.99 (br.s, -CF<sub>2</sub>-, 2F), -123.89 (br.s, =CHCF<sub>2</sub>CF<sub>2</sub>-, 2F), 126.42 (m, -CF<sub>2</sub>-, 2F).

**HRMS (EI)** [M]<sup>+</sup> calcd for C<sub>14</sub>H<sub>11</sub>F<sub>17</sub>, 502.05838; found, 502.05844.

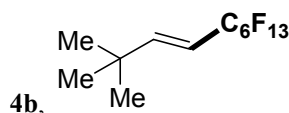

**<sup>1</sup>H NMR (300 MHz, CDCl<sub>3</sub>):**  $\delta$  = 6.42 (dt,  $J$  = 16.0, 2.2 Hz, =CHCF<sub>2</sub>-, 1H), 5.51 (dt,  $J$  = 16.0, 11.9 Hz, -CH=CHCF<sub>2</sub>-, 1H), 1.11 (s, -CH<sub>3</sub>, 9H).

**<sup>19</sup>F NMR (282 MHz, CDCl<sub>3</sub>):**  $\delta$  = -81.05 (tt,  $J$  = 10.1, 2.5 Hz, -CF<sub>3</sub>, 3F), -111.29 (q,  $J$  = 12.3 Hz, =CHCF<sub>2</sub>-, 2F), -121.75 (m, -CF<sub>2</sub>-, 2F), -123.05 (m, -CF<sub>2</sub>-, 2F), -123.82 (m, -CF<sub>2</sub>-, 2F), -126.34 (m, -CF<sub>2</sub>-, 2F).

**MS (EI, 70 eV):**  $m/z$  (%) = 402.1 (2) [M]<sup>+</sup>, 401.1 (13) [M-H]<sup>+</sup>, 387.1 (2), 295.0 (1), 131.0 (1), 83.1 (5), 69.1 (10), 57.0 (100).

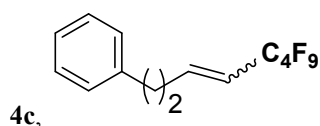

mixture of *E* and *Z* isomers (81:19).

## SUPPORTING INFORMATION

**<sup>1</sup>H NMR (300 MHz, CDCl<sub>3</sub>):**  $\delta$  = 7.46 – 7.29 (m, Ar-*H*, 2H), 7.28 – 7.14 (m, Ar-*H*, 3H), 6.47 (dtt,  $J$  = 15.9, 6.8, 2.3 Hz, =CHCF<sub>2</sub>- (*E*)), 6.17 (dtt,  $J$  = 12.1, 7.3, 2.4 Hz, =CHCF<sub>2</sub>- (*Z*)), 5.82 – 5.38 (m, -CH=CHCF<sub>2</sub>- (*E* and *Z*), 1H), 2.79 (m, PhCH<sub>2</sub>-, 2H), 2.74 – 2.62 (m, -CH<sub>2</sub>CH= (*Z*)), 2.61 – 2.49 (m, -CH<sub>2</sub>CH= (*E*)).

**<sup>19</sup>F NMR (282 MHz, CDCl<sub>3</sub>):**  $\delta$  = -79.93 – -83.15 (m, -CF<sub>3</sub>, 3F), -105.71 – -108.92 (m, =CHCF<sub>2</sub>- (*Z*)), -111.55 – -111.68 (m, =CHCF<sub>2</sub>- (*E*)), -124.38 – -124.54 (m, =CHCF<sub>2</sub>CF<sub>2</sub>- (*E*)), -124.64 – -124.74 (m, =CHCF<sub>2</sub>CF<sub>2</sub>- (*Z*)), -125.75 – -125.89 (m, -CF<sub>2</sub>-, 2F).

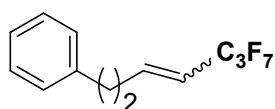

**4d,** mixture of *E* and *Z* isomers (80:20).

**<sup>1</sup>H NMR (300 MHz, CDCl<sub>3</sub>):**  $\delta$  = 7.45 – 7.31 (m, Ar-*H*, 2H), 7.31 – 7.18 (m, Ar-*H*, 3H), 6.50 (dtt,  $J$  = 15.9, 6.8, 2.3 Hz, =CHCF<sub>2</sub>- (*E*)), 6.20 (dtt,  $J$  = 12.0, 7.3, 2.3 Hz, =CHCF<sub>2</sub>- (*Z*)), 5.81 – 5.45 (m, -CH=CHCF<sub>2</sub>- (*E* and *Z*), 1H), 2.81 (q,  $J$  = 6.9 Hz, PhCH<sub>2</sub>-, 2H), 2.76 – 2.65 (m, -CH<sub>2</sub>CH= (*Z*)), 2.65 – 2.49 (m, -CH<sub>2</sub>CH= (*E*)).

**<sup>19</sup>F NMR (282 MHz, CDCl<sub>3</sub>):**  $\delta$  = -80.43 (q,  $J$  = 8.7 Hz, -CF<sub>3</sub>, 3F), -107.76 – -108.08 (m, =CHCF<sub>2</sub>- (*Z*)), -112.20 – -112.78 (m, =CHCF<sub>2</sub>- (*E*)), -127.93 (s, =CHCF<sub>2</sub>CF<sub>2</sub>- (*E*)), -128.18 (s, =CHCF<sub>2</sub>CF<sub>2</sub>- (*Z*)).

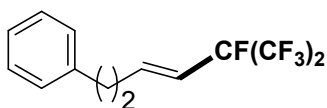

**4e,**

**<sup>1</sup>H NMR (300 MHz, CDCl<sub>3</sub>):**  $\delta$  = 7.50 – 7.29 (m, Ar-*H*, 2H), 7.29 – 7.13 (m, Ar-*H*, 3H), 6.40 (dt,  $J$  = 15.7, 6.9 Hz, =CHCF<sub>2</sub>-, 1H), 5.73 – 5.34 (m, -CH=CHCF<sub>2</sub>-, 1H), 2.81 (t,  $J$  = 7.6 Hz, PhCH<sub>2</sub>-, 2H), 2.64 – 2.40 (m, -CH<sub>2</sub>CH=, 2H).

**<sup>13</sup>C NMR (75 MHz, CDCl<sub>3</sub>):**  $\delta$  = 140.47 and 140.33 (d,  $J$  = 10.3 Hz, -CH<sub>2</sub>CH=), 140.40, 128.48, 128.40, 126.23, 114.73 (d,  $J$  = 16.9 Hz, =CHCF<sub>2</sub>-), 34.58, 34.05.

**<sup>13</sup>C NMR Dept135 (75 MHz, CDCl<sub>3</sub>):**  $\delta$  = (+): 140.41 (d,  $J$  = 10.3 Hz, -CH<sub>2</sub>CH=), 128.49, 128.41, 126.24, 114.74 (d,  $J$  = 17.0 Hz, =CHCF<sub>2</sub>-). (-): 34.59, 34.06.

**<sup>19</sup>F NMR (282 MHz, CDCl<sub>3</sub>):**  $\delta$  = -77.51 (d,  $J$  = 7.7 Hz, -CF(CF<sub>3</sub>)<sub>2</sub>, 6F), -182.89 – -189.09 (m, -CF(CF<sub>3</sub>)<sub>2</sub>, 1F).

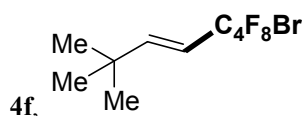

**4f,**

**<sup>1</sup>H NMR (300 MHz, CDCl<sub>3</sub>):**  $\delta$  = 6.31 (dt,  $J$  = 16.0, 2.2 Hz, =CHCF<sub>2</sub>-, 1H), 5.41 (dt,  $J$  = 16.0, 11.9 Hz, -CH=CHCF<sub>2</sub>-, 1H), 1.01 (s, -CH<sub>3</sub>, 9H).

**<sup>19</sup>F NMR (282 MHz, CDCl<sub>3</sub>):**  $\delta$  = -63.02 – -63.30 (m, -CF<sub>2</sub>Br, 2F), -111.31 (q,  $J$  = 12.2 Hz, =CHCF<sub>2</sub>-, 2F), -116.26 – -117.04 (m, -CF<sub>2</sub>-, 2F), -122.44 – -123.19 (m, -CF<sub>2</sub>-, 2F).

### 6.4 Characterization data of trifluoromethylated alkenes

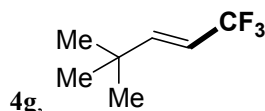

**4g,**

**<sup>19</sup>F NMR (282 MHz, CDCl<sub>3</sub>):**  $\delta$  = -67.30 (t,  $J$  = 11.0 Hz, -CF<sub>3</sub>, 3F).



## SUPPORTING INFORMATION

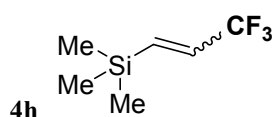

mixture of *E* and *Z* isomers (84:16).

<sup>19</sup>F NMR (282 MHz, CDCl<sub>3</sub>): δ = -62.35 (s, -CF<sub>3</sub> (*Z*)), -67.43 (s, -CF<sub>3</sub> (*E*)).

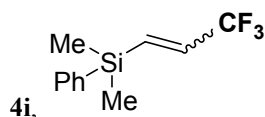

mixture of *E* and *Z* isomers (84:16).

<sup>1</sup>H NMR (300 MHz, CDCl<sub>3</sub>): δ = 7.42 – 7.31 (m, Ar-*H*, 2H), 7.29 – 7.14 (m, Ar-*H*, 3H), 6.59 (dq, *J* = 18.9, 2.0 Hz, =CHCF<sub>2</sub>- (*E*)), 6.35 – 6.06 (m, =CHCF<sub>2</sub>- (*Z*)), 5.97 – 5.79 (m, -CH=CHCF<sub>2</sub>- (*E*)), 5.68 – 5.52 (m, -CH=CHCF<sub>2</sub>- (*Z*)), 0.27 (s, -CH<sub>3</sub>, 6H).

<sup>13</sup>C NMR (101 MHz, CDCl<sub>3</sub>): δ = 143.32 (q, *J* = 5.7 Hz, -CH=CHCF<sub>2</sub>- (*Z*)), 140.76 (q, *J* = 4.8 Hz, -CH=CHCF<sub>2</sub>- (*E*)), 137.77 (*C* of -Ph, 1C), 135.77 (*C* of -Ph, 2C), 134.43 (q, *J* = 34.0 Hz, =CHCF<sub>2</sub>-, 1C), 131.67 (*C* of -Ph, 1C), 130.06 (*C* of -Ph, 2C), 124.13 (q, *J* = 271.6 Hz, -CF<sub>3</sub>, 1C), -1.36 (-CH<sub>3</sub>, 2C).

<sup>19</sup>F NMR (282 MHz, CDCl<sub>3</sub>): δ = -61.37 – -61.42 (m, -CF<sub>3</sub> (*Z*)), -66.49 (dd, *J* = 5.9, 2.0 Hz, -CF<sub>3</sub> (*E*)).

MS (EI, 70 eV): *m/z* (%) = 200.1 (21) [M]<sup>+</sup>, 91.1 (100).

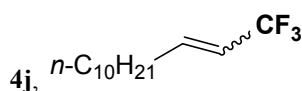

mixture of *E* and *Z* isomers (87:13).

<sup>1</sup>H NMR (300 MHz, CDCl<sub>3</sub>): δ = 6.54 – 6.28 (m, =CHCF<sub>2</sub>- (*E*)), 5.98 (dt, *J* = 11.6, 7.9 Hz, =CHCF<sub>2</sub>- (*Z*)), 5.74 – 5.45 (m, -CH=CHCF<sub>2</sub>-, 1H), 2.43 – 2.21 (m, -CH<sub>2</sub>CH= (*Z*)), 2.22 – 2.06 (m, -CH<sub>2</sub>CH= (*E*)), 1.52 – 1.36 (m, -CH<sub>2</sub>-, 2H), 1.27 (br.s, -CH<sub>2</sub>-, 14H), 0.89 (t, *J* = 6.7 Hz, -CH<sub>3</sub>, 3H).

<sup>13</sup>C NMR (101 MHz, CDCl<sub>3</sub>): δ = 143.20 (q, *J* = 5.5 Hz, -CH=CHCF<sub>2</sub>- (*Z*)), 140.81 (q, *J* = 6.5 Hz, -CH=CHCF<sub>2</sub>- (*E*)), 123.13 (q, *J* = 269.0 Hz, -CF<sub>3</sub>), 118.25 (q, *J* = 33.1 Hz, =CHCF<sub>2</sub>- (*E*)), 118.20 (q, *J* = 33.2 Hz, =CHCF<sub>2</sub>- (*Z*)), 31.90, 31.45, 29.58, 29.52, 29.36, 29.32, 29.03, 27.96, 22.68, 14.09.

<sup>19</sup>F NMR (282 MHz, CDCl<sub>3</sub>): δ = -58.09 (dt, *J* = 8.7, 2.3 Hz, -CF<sub>3</sub> (*Z*)), -63.86 – -64.00 (m, -CF<sub>3</sub> (*E*)).

MS (EI, 70 eV): *m/z* (%) = 236.3 (1) [M]<sup>+</sup>, 208.2 (9), 193.1 (13), 179.1 (15), 165.1 (20), 151.1 (30), 137.1 (18), 123.1 (11), 111.1 (27), 97.1 (58), 83.1 (56), 69.1 (89), 57.1 (100).

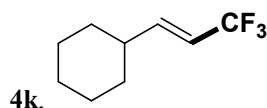

<sup>1</sup>H NMR (300 MHz, CDCl<sub>3</sub>): δ = 6.37 – 6.11 (m, =CHCF<sub>2</sub>-, 1H), 5.64 – 5.31 (m, -CH=CHCF<sub>2</sub>-, 1H), 2.11 – 1.91 (m, -CH(CH<sub>2</sub>)<sub>2</sub>-, 1H), 1.77 – 1.53 (m, -CH<sub>2</sub>-, 4H), 1.34 – 0.92 (m, -CH<sub>2</sub>-, 6H).

<sup>19</sup>F NMR (282 MHz, CDCl<sub>3</sub>): δ = -63.78 (dt, *J* = 6.6, 2.1 Hz, -CF<sub>3</sub>, 3F).

MS (EI, 70 eV): *m/z* (%) = 178.1 (2) [M]<sup>+</sup>, 163.1 (4), 136.1 (6), 115.1 (8), 95.1 (7), 82.1 (100), 67.1 (72), 54.1 (14).

## SUPPORTING INFORMATION

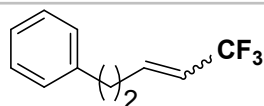

**4l**, mixture of *E* and *Z* isomers (84:16).

**<sup>19</sup>F NMR (282 MHz, CDCl<sub>3</sub>):**  $\delta$  = -59.08 (s, -CF<sub>3</sub> (*Z*)), -65.00 (s, -CF<sub>3</sub> (*E*)).

**MS (EI, 70 eV):** *m/z* (%) = 229.9 (<1) [M]<sup>+</sup>, 215.1 (100) [M-Me]<sup>+</sup>, 153.1 (8), 133.1 (67), 121.1 (23), 105.1 (11), 91.1 (7), 77.1 (31).

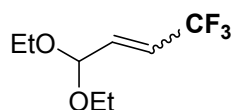

**4m**,

**<sup>19</sup>F NMR (282 MHz, CDCl<sub>3</sub>):**  $\delta$  = -64.01 – -64.43 (m, -CF<sub>3</sub> (*Z*)), -65.18 – -65.80 (m, -CF<sub>3</sub> (*E*)).

**MS (EI, 70 eV):** *m/z* (%) = 198.0 (<1) [M]<sup>+</sup>, 197.1 (1) [M-H]<sup>+</sup>, 153.1 (77) [M-EtO]<sup>+</sup>, 125.1 (100), 103.1 (6), 77.0 (6).

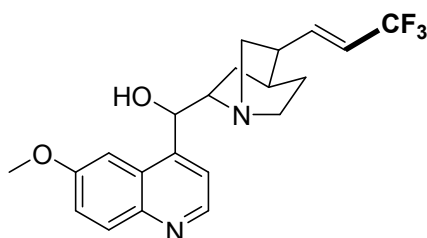

**4n**,

**<sup>1</sup>H NMR (300 MHz, CDCl<sub>3</sub>):**  $\delta$  = 8.67 (d, *J* = 4.5 Hz, 1H), 7.96 (d, *J* = 9.2 Hz, 1H), 7.38 (d, *J* = 4.5 Hz, 1H), 7.32 (dd, *J* = 9.3, 2.7 Hz, 1H), 7.15 (s, 1H), 6.34 (dd, *J* = 11.6, 10.2 Hz, 1H), 6.22 (s, 1H), 5.76 – 5.53 (m, 1H), 3.87 (s, 3H), 3.38 – 3.12 (m, 1H), 3.07 – 2.58 (m, 5H), 2.31 – 2.10 (m, 1H), 1.86 – 1.76 (m, 2H), 1.58 – 1.43 (m, 3H).

**<sup>13</sup>C NMR (101 MHz, CDCl<sub>3</sub>):**  $\delta$  = 158.22, 147.35, 144.70, 143.92 (q, *J* = 4.1 Hz, -CH=CHCF<sub>2</sub>-), 141.86, 132.08, 126.70, 123.13 (q, *J* = 271.9 Hz, -CF<sub>3</sub>), 121.96, 119.01 (q, *J* = 33.3 Hz, =CHCF<sub>2</sub>-), 100.57, 60.20, 55.63, 49.88, 49.80, 34.80, 27.64, 25.83, 21.62.

**<sup>19</sup>F NMR (282 MHz, CDCl<sub>3</sub>):**  $\delta$  = -57.79 (dd, *J* = 8.6, 1.8 Hz, -CF<sub>3</sub>).

**MS (EI, 70 eV):** *m/z* (%) = 391.3 (<1) [M-H]<sup>+</sup>, 375.2 (100) [M-OH]<sup>+</sup>, 347.1 (4), 253.1 (7), 204.1 (11), 184.0 (8), 154.1 (4), 136.0 (3), 77.0 (1).

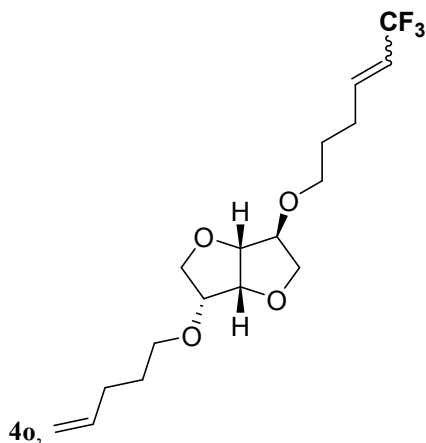

**4o**,

**<sup>19</sup>F NMR (282 MHz, CDCl<sub>3</sub>):**  $\delta$  = -58.42 (-CF<sub>3</sub> (*Z*)), -64.33 (-CF<sub>3</sub> (*E*)).

## SUPPORTING INFORMATION

**MS (EI, 70 eV):** m/z (%) = 350.2 (5) [M]<sup>+</sup>, 264.2 (8), 136.1 (13), 117.1 (26), 97.1 (13), 84.1 (46), 69.1 (100).

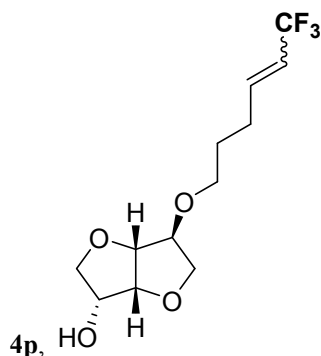

**<sup>19</sup>F NMR (282 MHz, CDCl<sub>3</sub>):** δ = -58.43 (-CF<sub>3</sub> (Z)), -64.35 (-CF<sub>3</sub> (E)).

**MS (EI, 70 eV):** m/z (%) = 282.2 (23) [M]<sup>+</sup>, 136.1 (37), 117.1 (44), 97.1 (24), 86.1 (36), 85.1 (22), 84.1 (51), 77.1 (21), 69.1 (100), 68.1 (31), 58.1 (20).

### 6.5 Characterization data of others

Notes: For the <sup>13</sup>C NMR (F coupled), peaks for the C of perfluoroalkyl chain and C adjacent to perfluoroalkyl chain (in most cases) are too broad to be assigned (not shown in the following data).

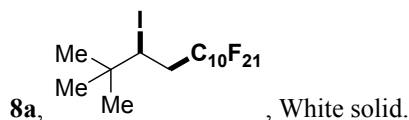

**<sup>1</sup>H NMR (300 MHz, CDCl<sub>3</sub>):** δ = 4.18 (dd, *J* = 8.5, 2.0 Hz, -CHI-, 1H), 3.05 – 2.66 (m, -CH<sub>2</sub>CF<sub>2</sub>-, 2H), 1.11 (s, -Me, 9H).

**<sup>19</sup>F NMR (282 MHz, CDCl<sub>3</sub>):** δ = -80.80 (t, *J* = 10.0 Hz, -CF<sub>3</sub>, 3F), -113.85 – -116.41 (m, -CH<sub>2</sub>CF<sub>2</sub>-, 2F), -121.81 (br.s, -CF<sub>2</sub>-, 10F), -122.73 (br.s, -CF<sub>2</sub>-, 2F), -123.66 (br.s, -CF<sub>2</sub>-, 2F), -126.14 (br.s, -CF<sub>2</sub>-, 2F).

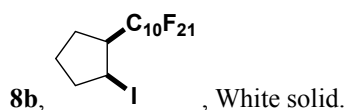

**<sup>1</sup>H NMR (300 MHz, CDCl<sub>3</sub>):** δ = 4.50 (dt, *J* = 6.8, 4.5 Hz, -CHI-, 1H), 3.40 – 2.92 (m, -CH<sub>2</sub>CF<sub>2</sub>-, 1H), 2.36 – 1.65 (m, -CH<sub>2</sub>-, 6H).

**<sup>13</sup>C NMR (101 MHz, CDCl<sub>3</sub>):** δ = 53.68 (dd, *J* = 21.6, 19.7 Hz), 41.01, 26.35, 25.35, 18.65.

**<sup>19</sup>F NMR (282 MHz, CDCl<sub>3</sub>):** δ = -80.85 (t, *J* = 10.0 Hz, -CF<sub>3</sub>, 3F), -114.05 – -120.85 (dd, *J* = 1643.1, 274.4 Hz, -CH<sub>2</sub>CF<sub>2</sub>-, 2F, the right line is overlapped with the signal of -120.88), -120.88 (br.s, -CF<sub>2</sub>-, 2F), -121.78 (br.s, -CF<sub>2</sub>-, 10F), -122.75 (br.s, -CF<sub>2</sub>-, 2F), -126.17 (br.s, -CF<sub>2</sub>-, 2F).

## 7. References

- [1] E. A. Standley, S. J. Smith, P. Muller and T. F. Jamison, *Organometallics* **2014**, 33, 2012-2018.
- [2] L. Legnani, G. Prina-Cerai, T. Delcaillau, S. Willems and B. Morandi, *Science* **2018**, 362, 434-439.

# SUPPORTING INFORMATION

[3] J. Rabeah, J. Radnik, V. Briois, D. Maschmeyer, G. Stochniol, S. Peitz, H. Reeker, C. La Fontaine and A. Brückner, *ACS Catal.* **2016**, 6, 8224-8228.

## 8. Spectra

### 8.1 Spectra of alkenes

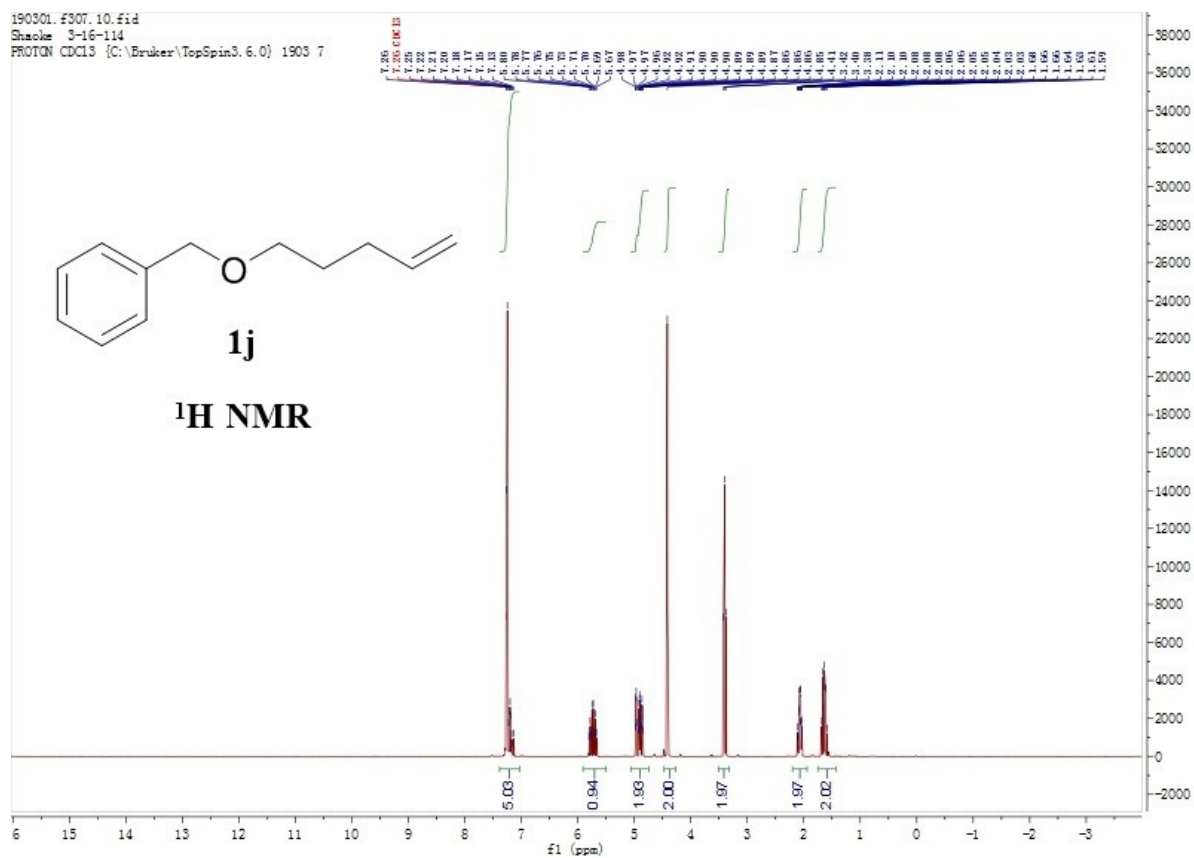

# SUPPORTING INFORMATION

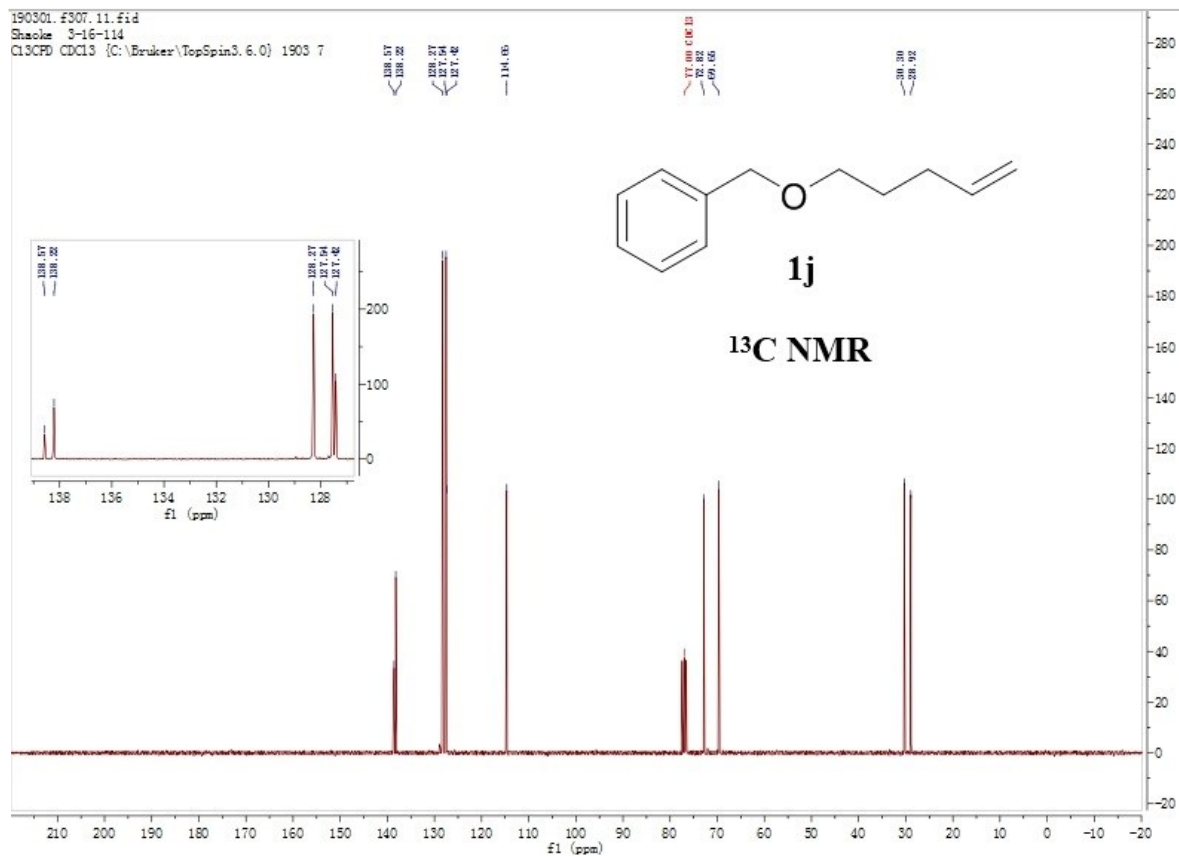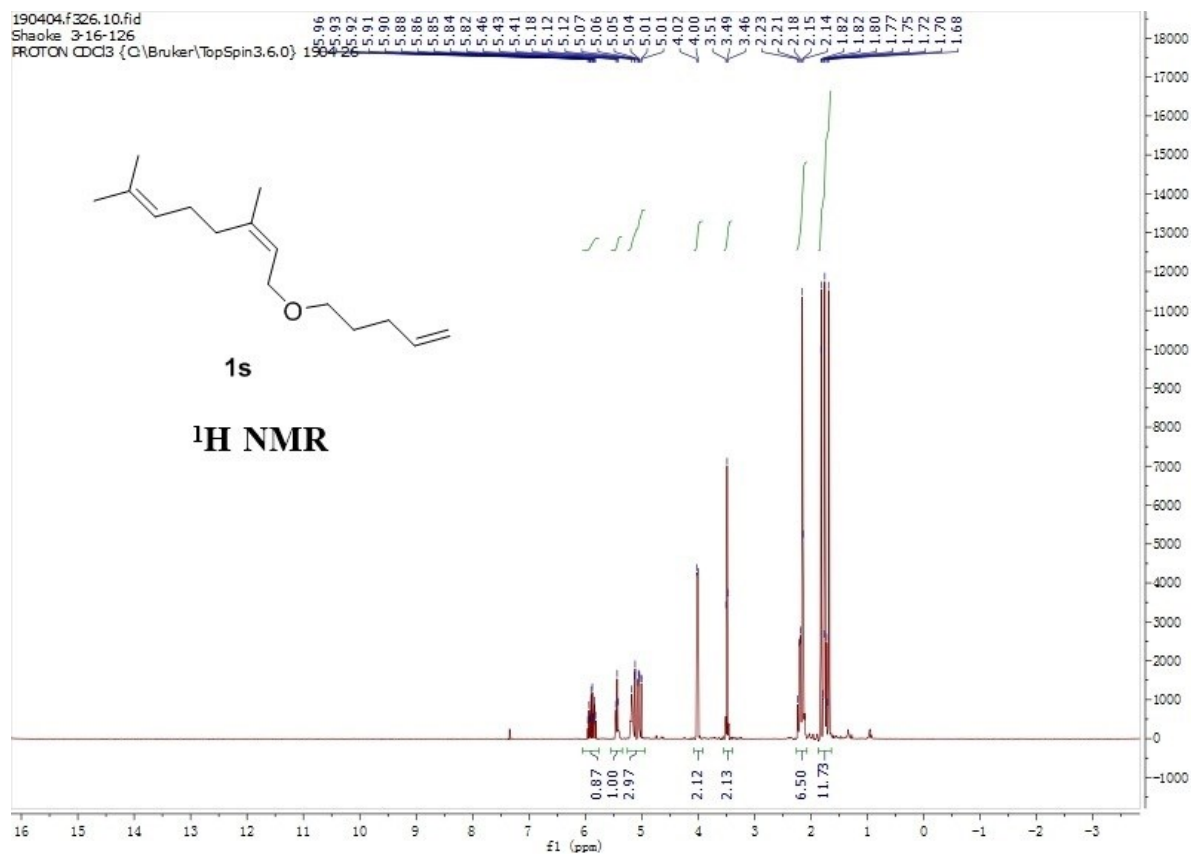

# SUPPORTING INFORMATION

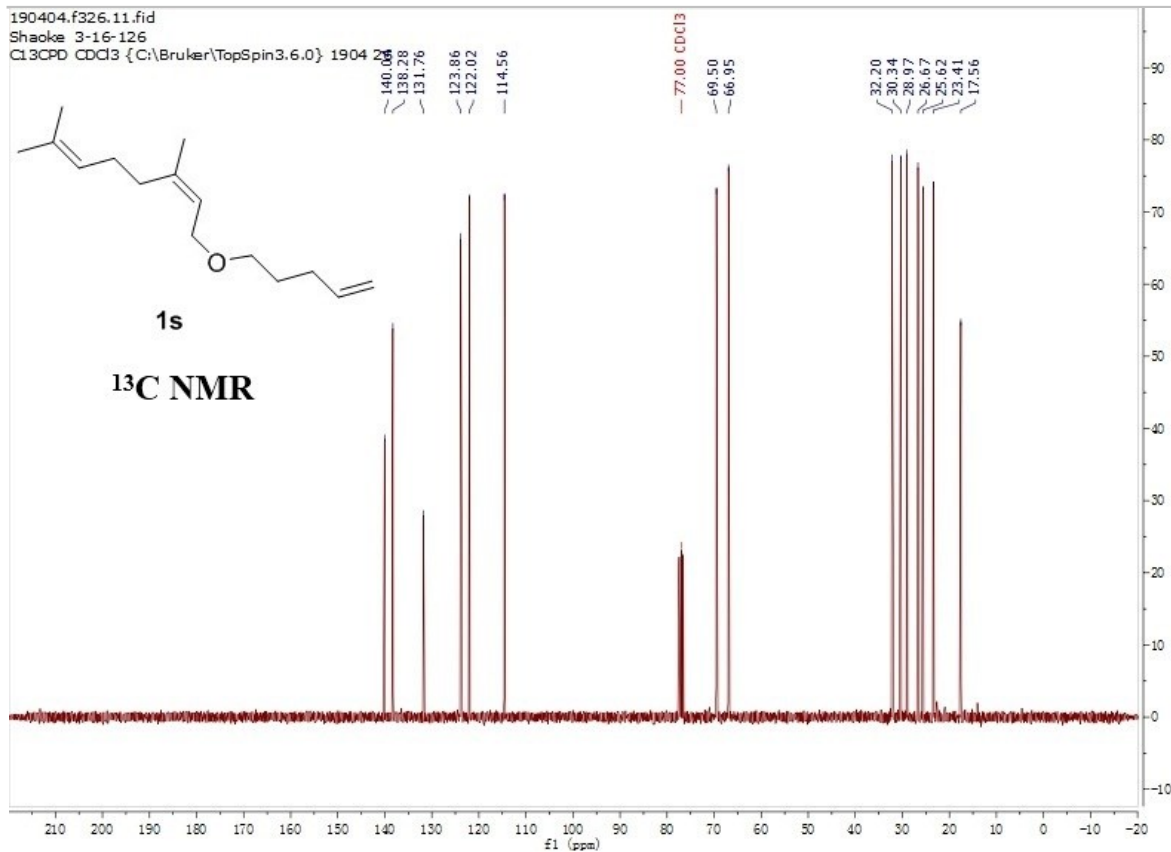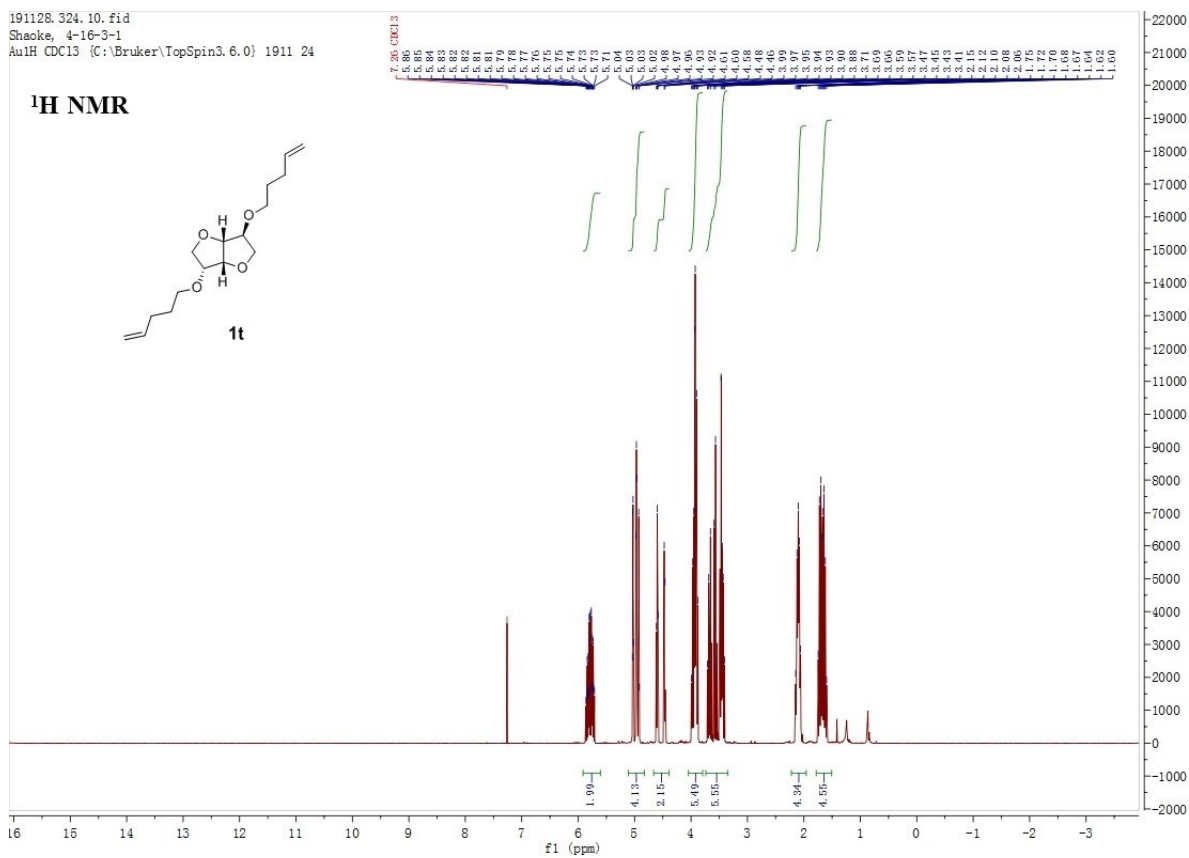

# SUPPORTING INFORMATION

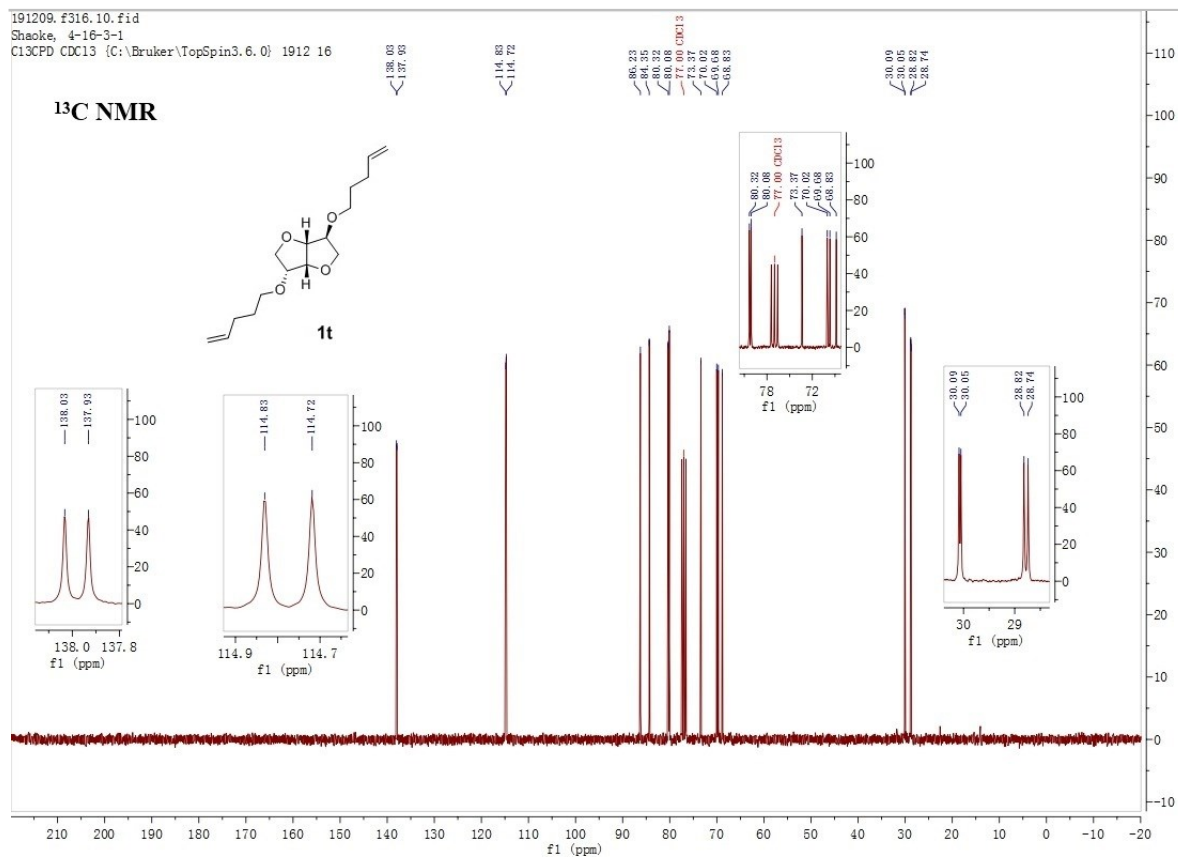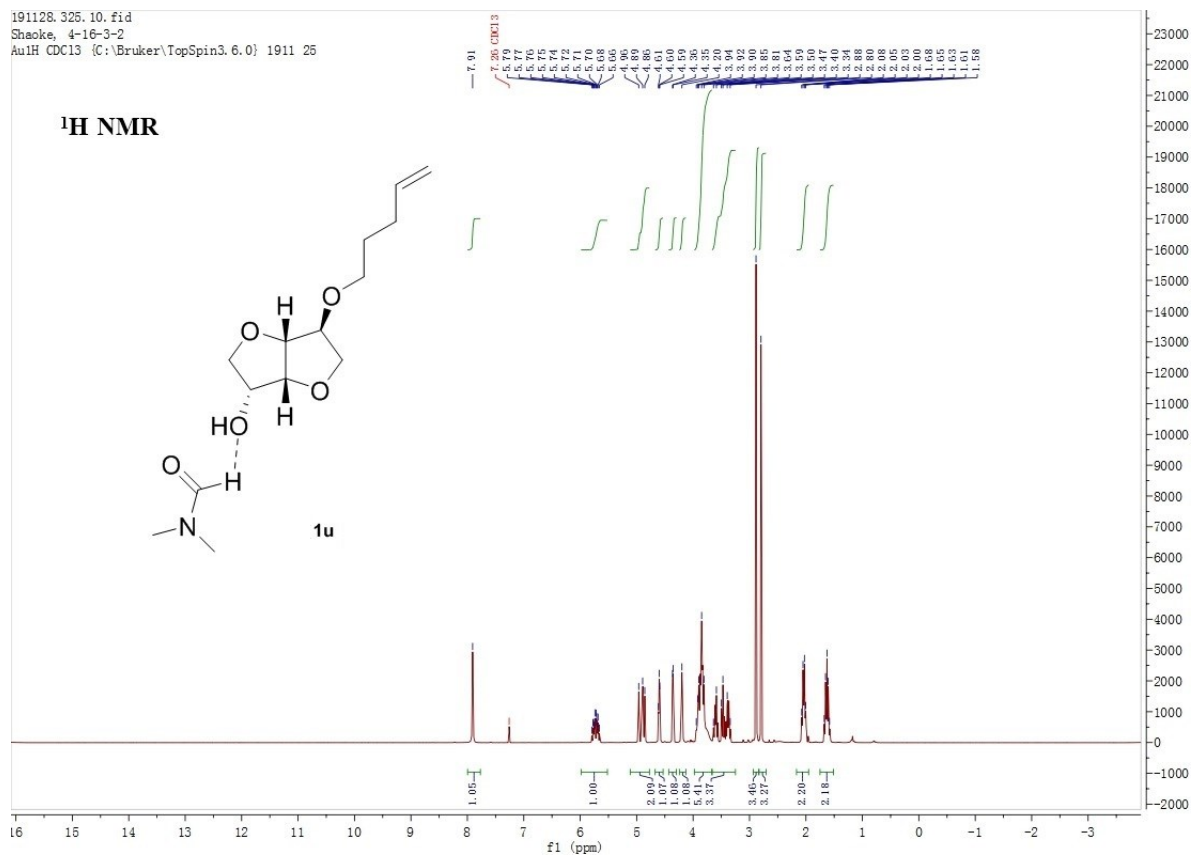

# SUPPORTING INFORMATION

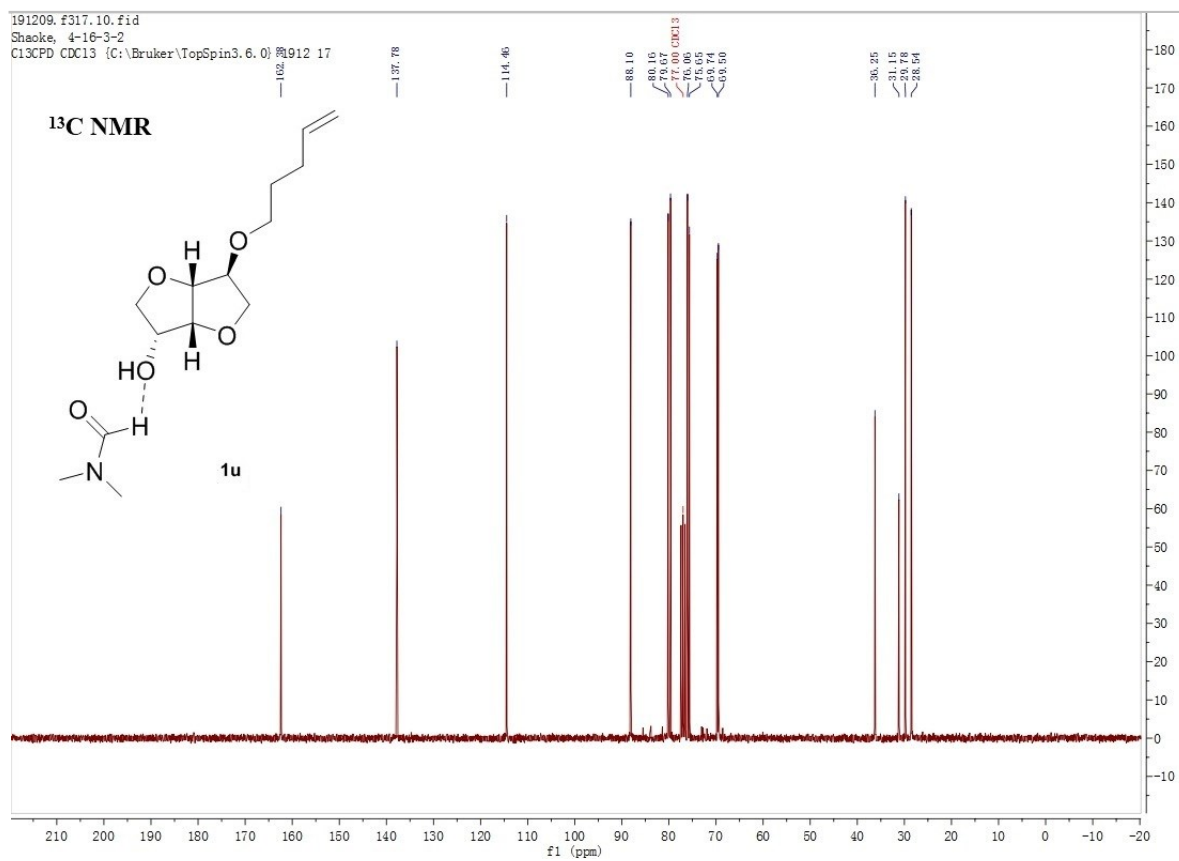



# SUPPORTING INFORMATION

## 8.2 Spectra of perfluorodecylated alkenes

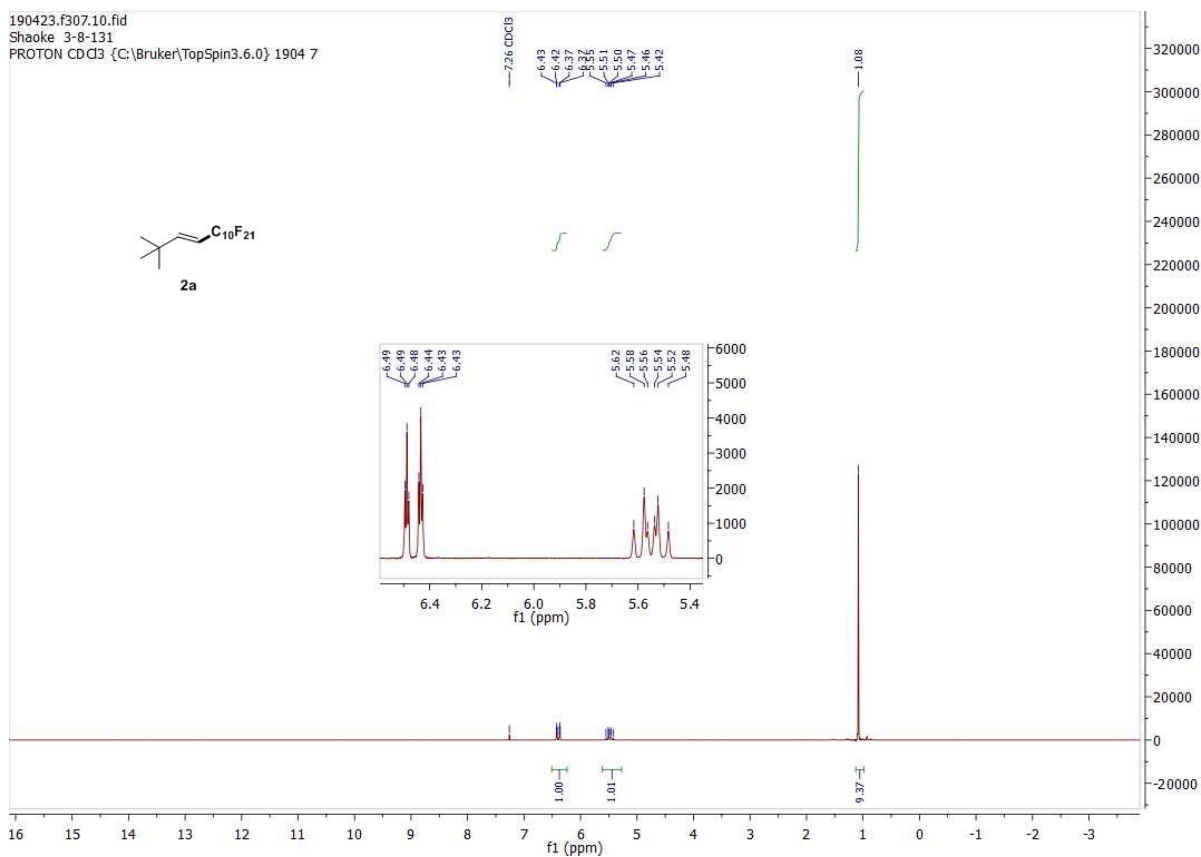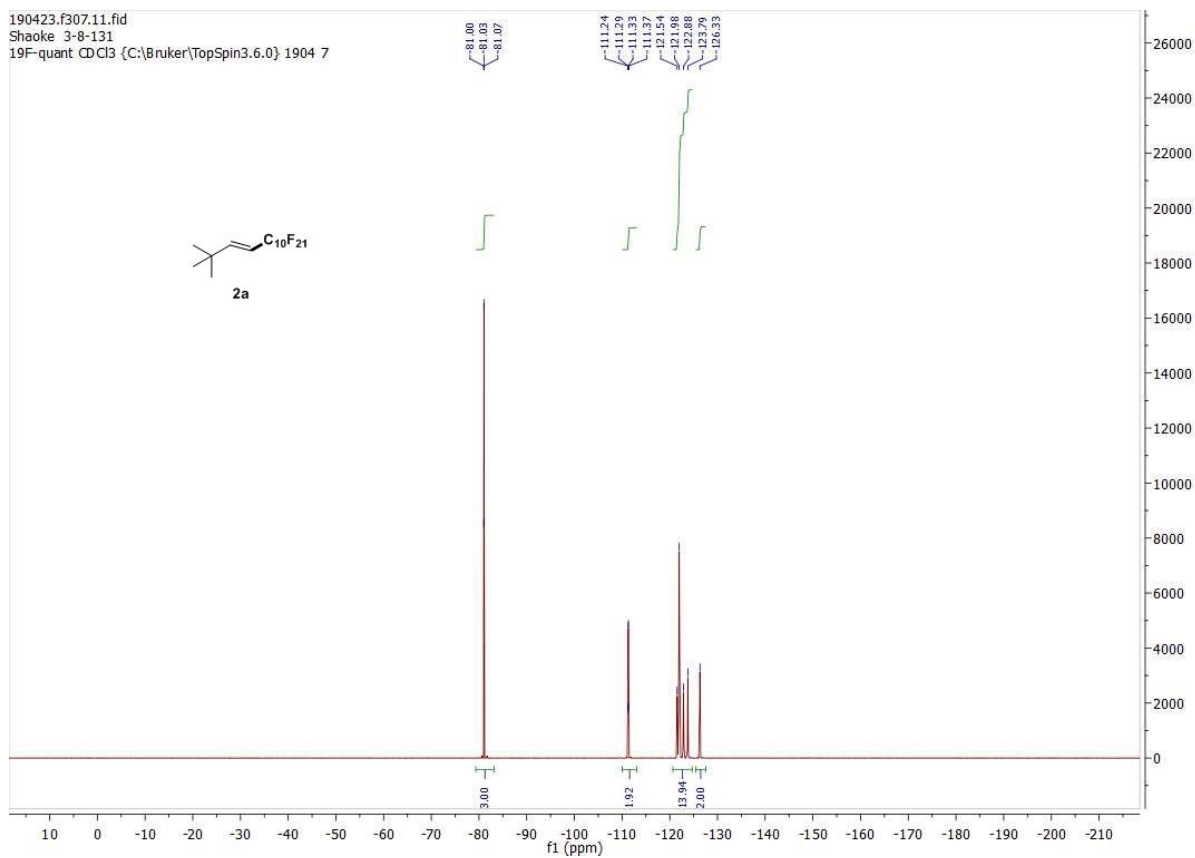

# SUPPORTING INFORMATION

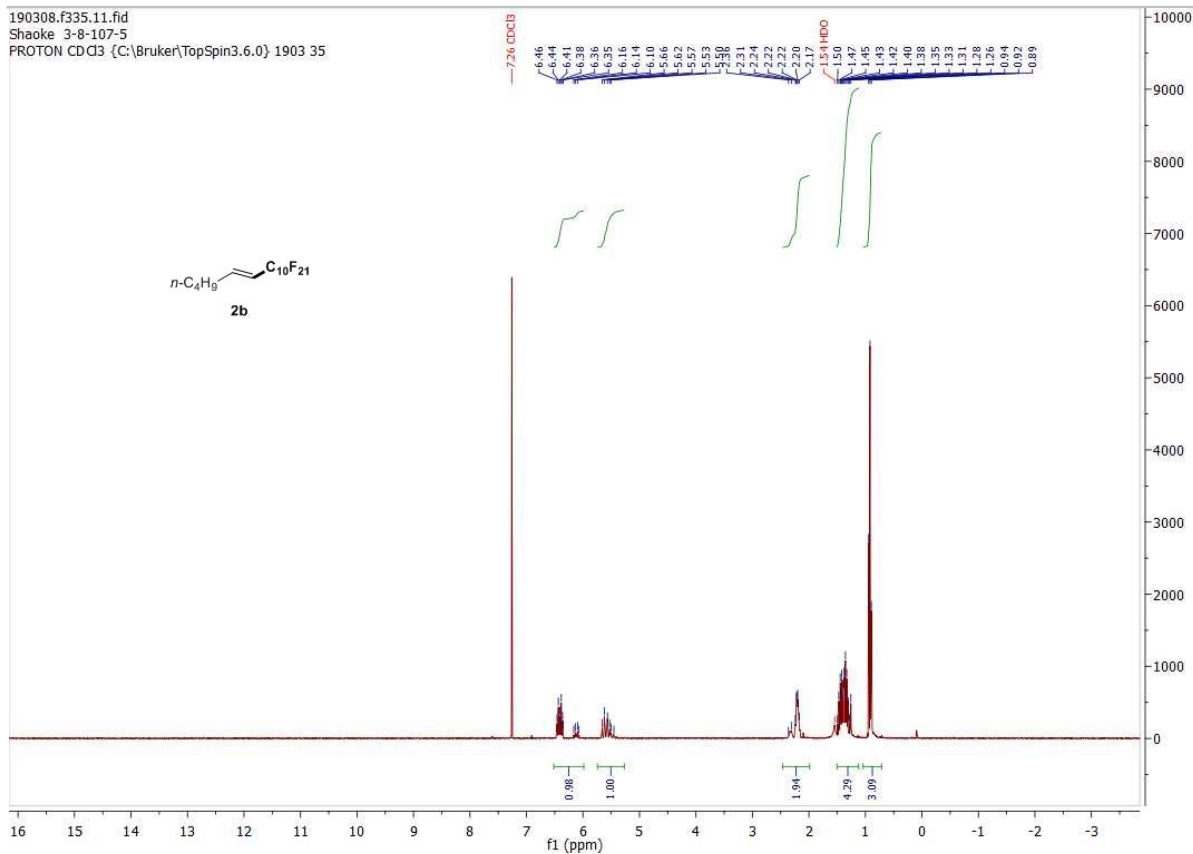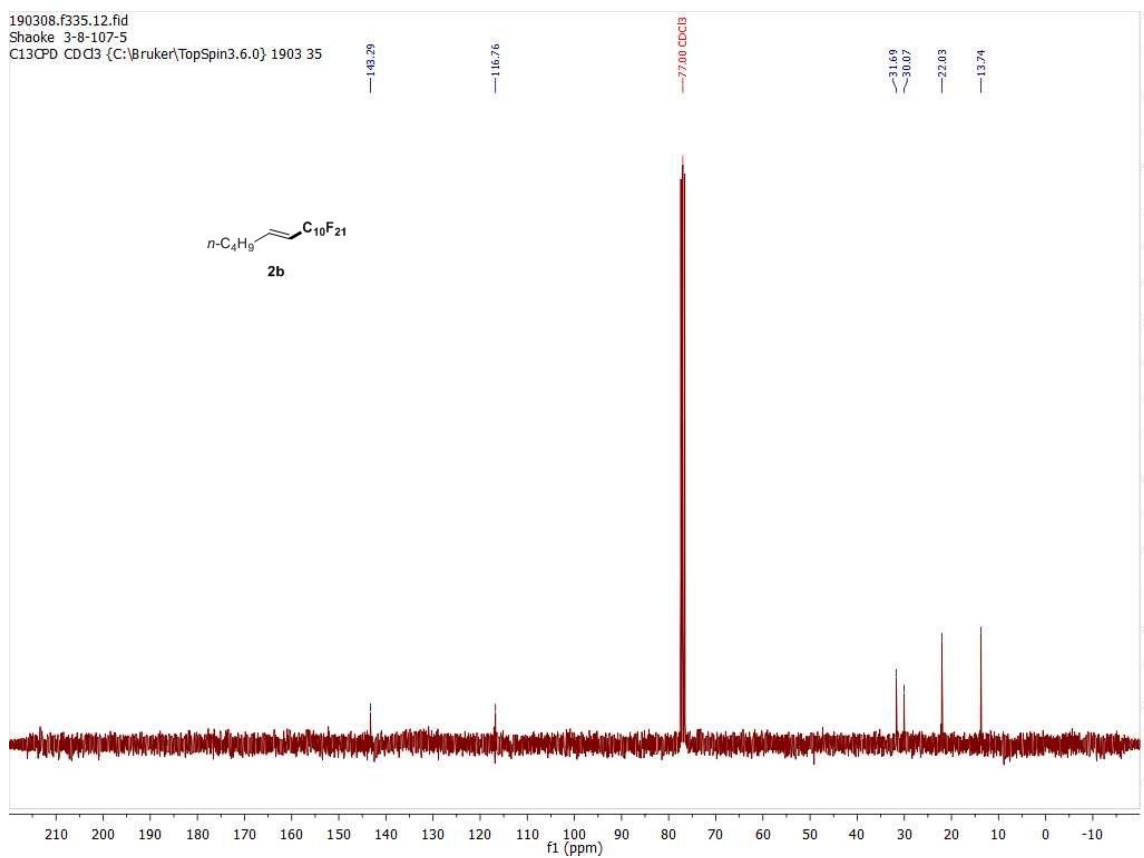

# SUPPORTING INFORMATION

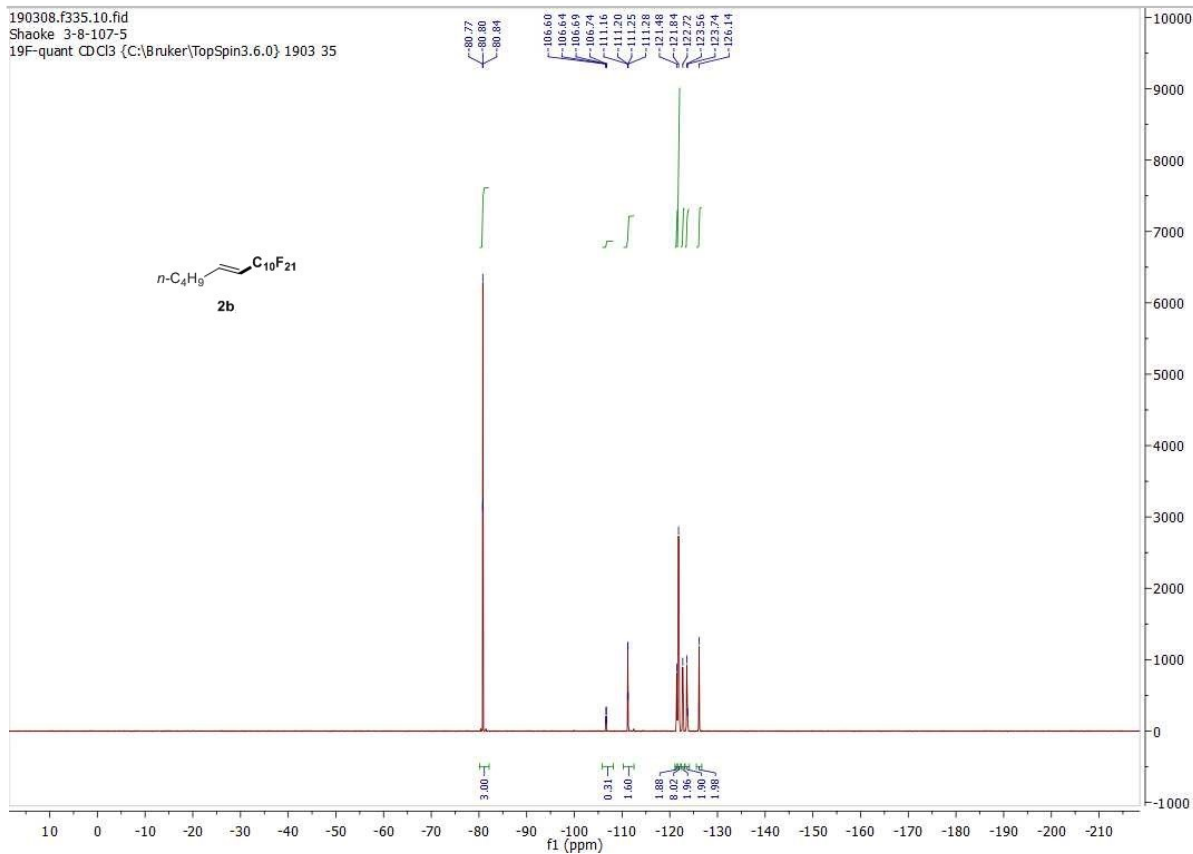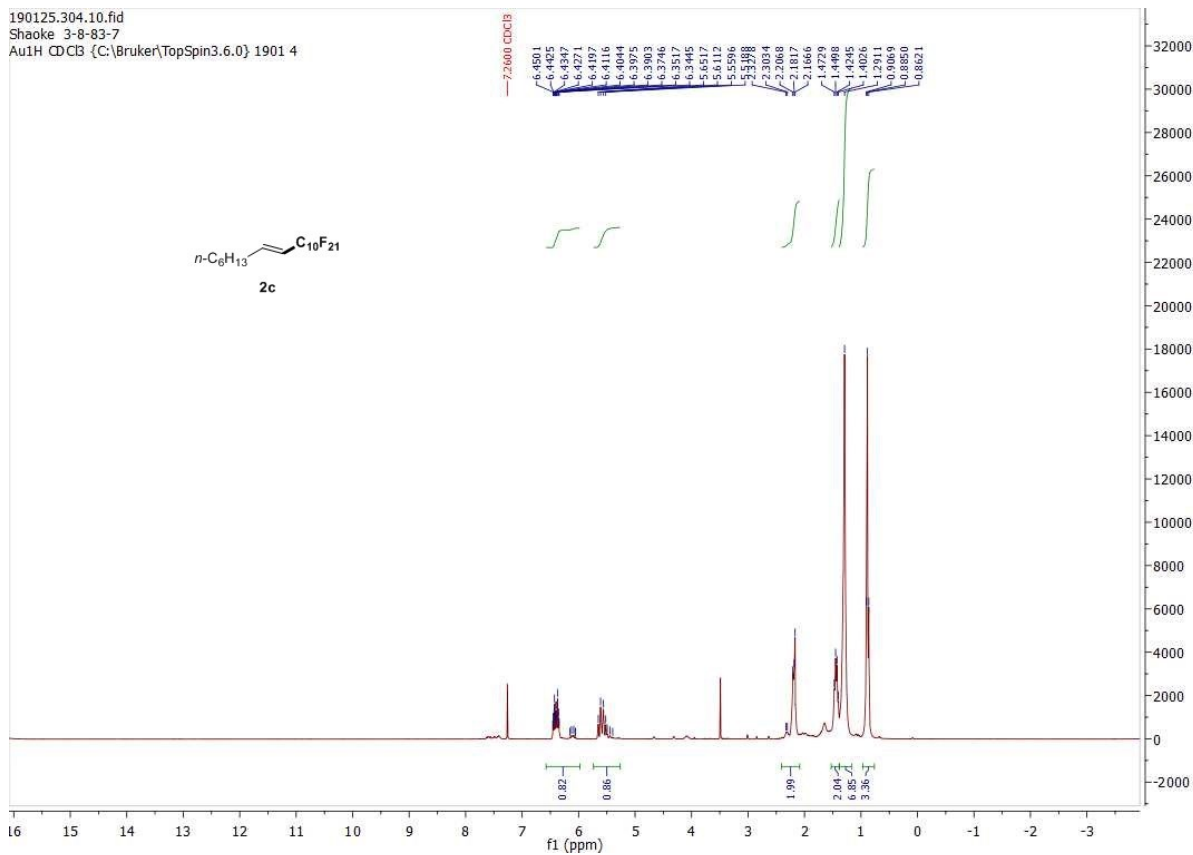

# SUPPORTING INFORMATION

190125.304.11.fid  
 Shaoke 3-8-83-7  
 Au13C CDCl3 {C:\Bruker\TopSpin3.6.0} 1901 4

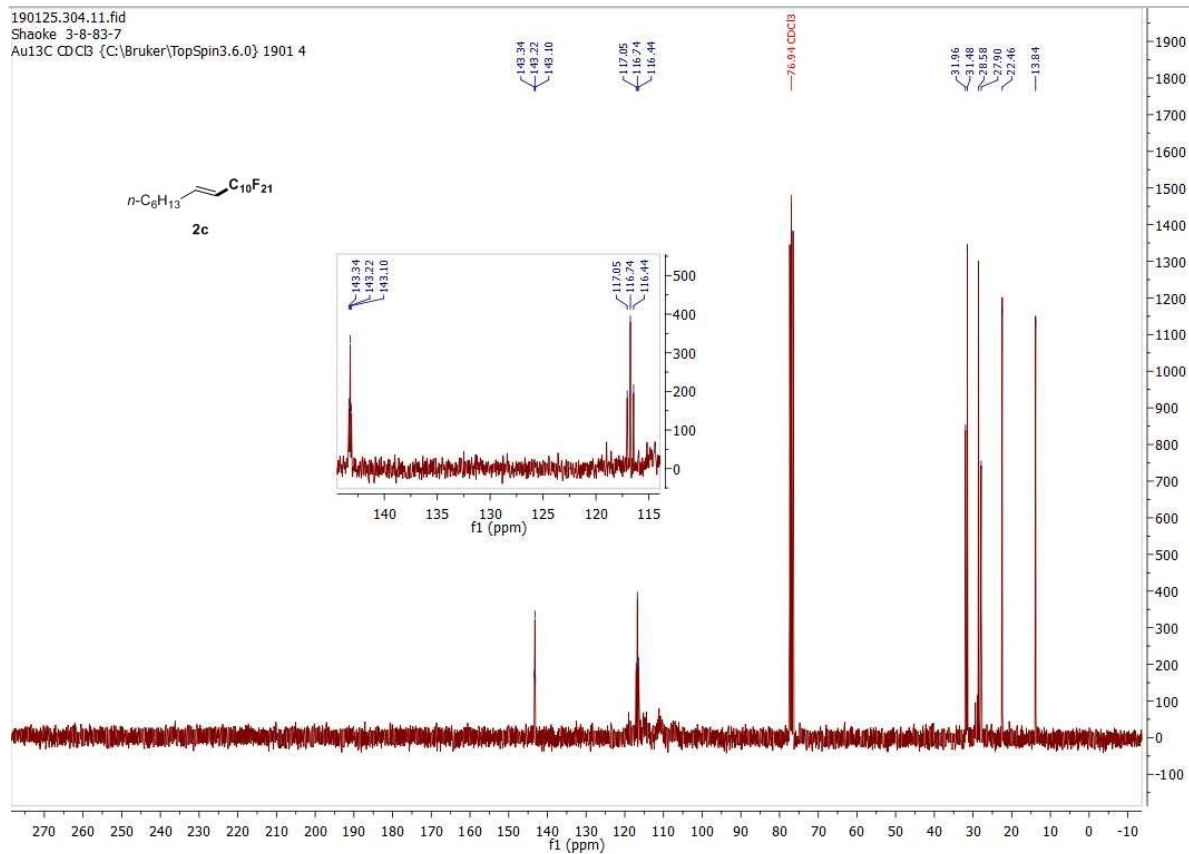

190128.f322.10.fid  
 Shaoke 3-8-83-7  
 19F-quant CDCl3 {C:\Bruker\TopSpin3.6.0} 1901 22

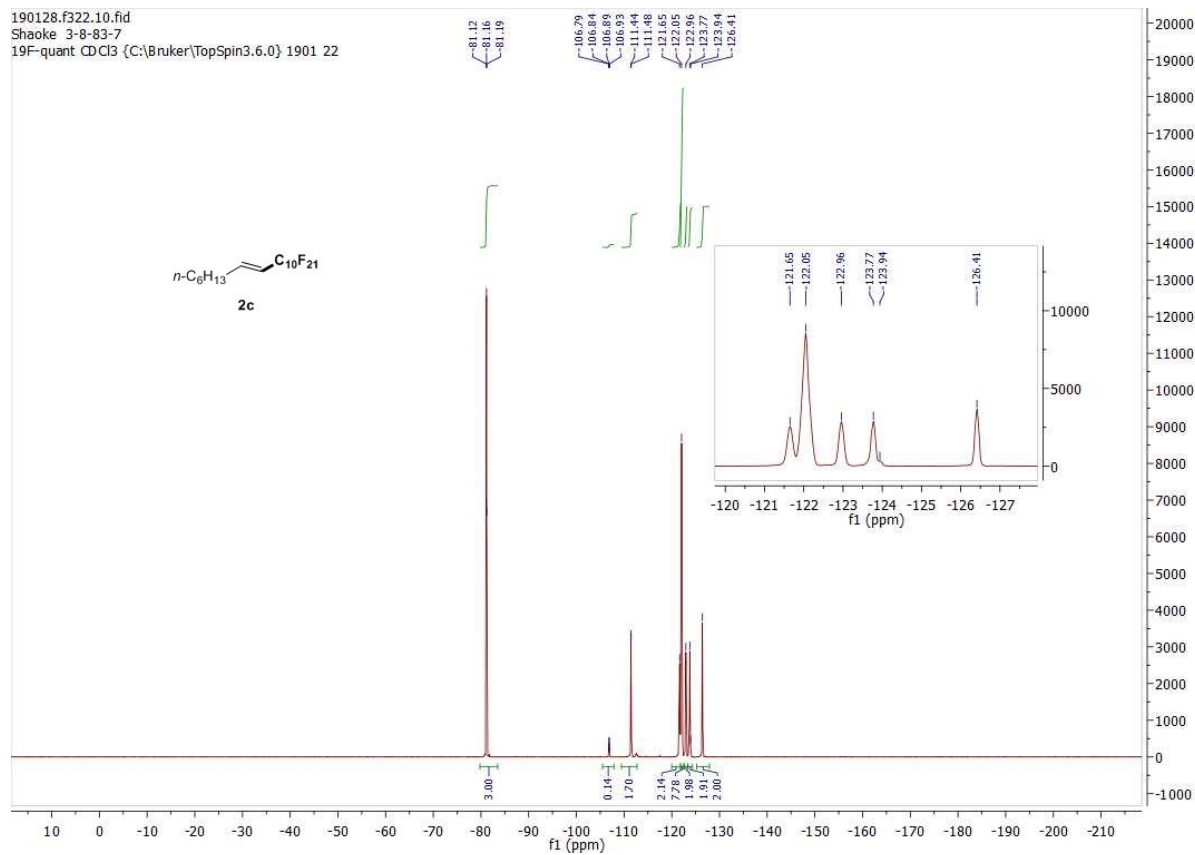

# SUPPORTING INFORMATION

190909.f333.10.fid  
 Shaok 3-20-16P-1  
 PROTON CDCl<sub>3</sub> {C:\Bruker\TopSpin3.6.0} 1909 33

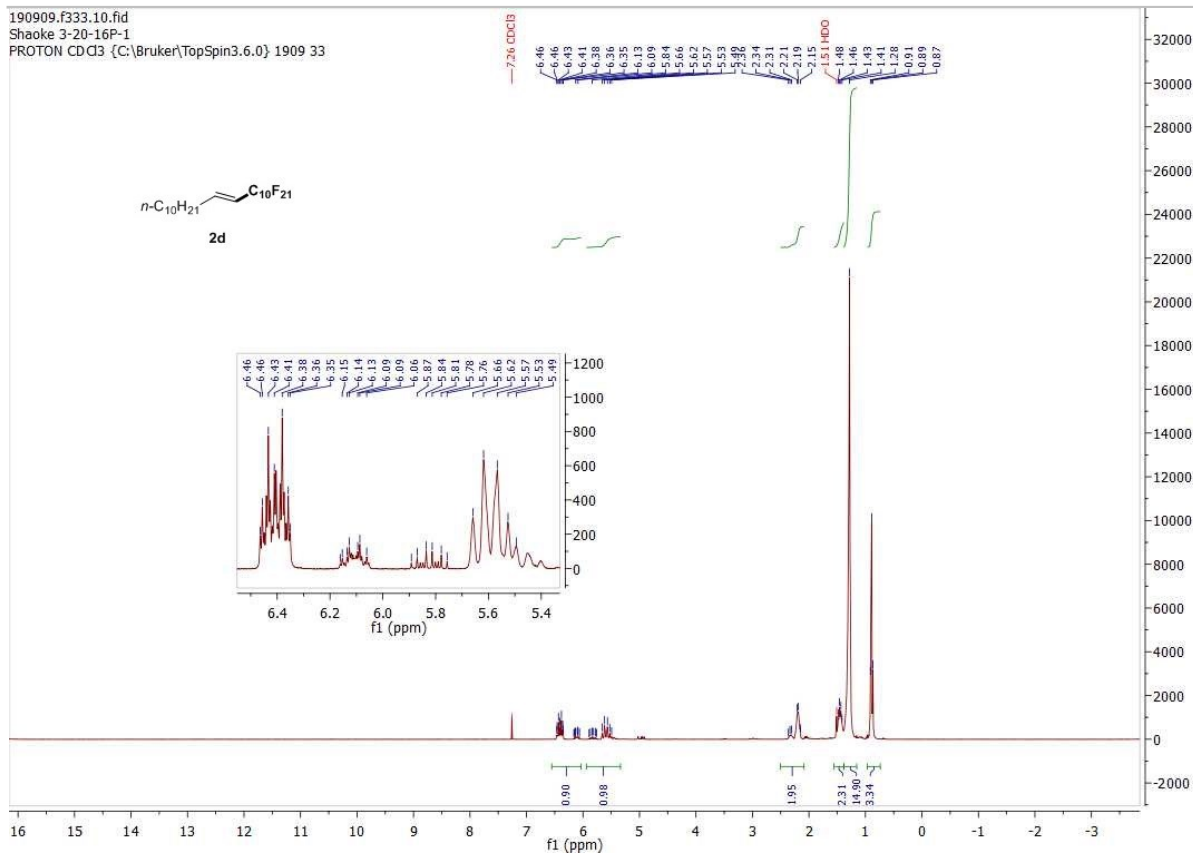

190909.f333.11.fid  
 Shaok 3-20-16P-1  
 C13CPD CDCl<sub>3</sub> {C:\Bruker\TopSpin3.6.0} 1909 33

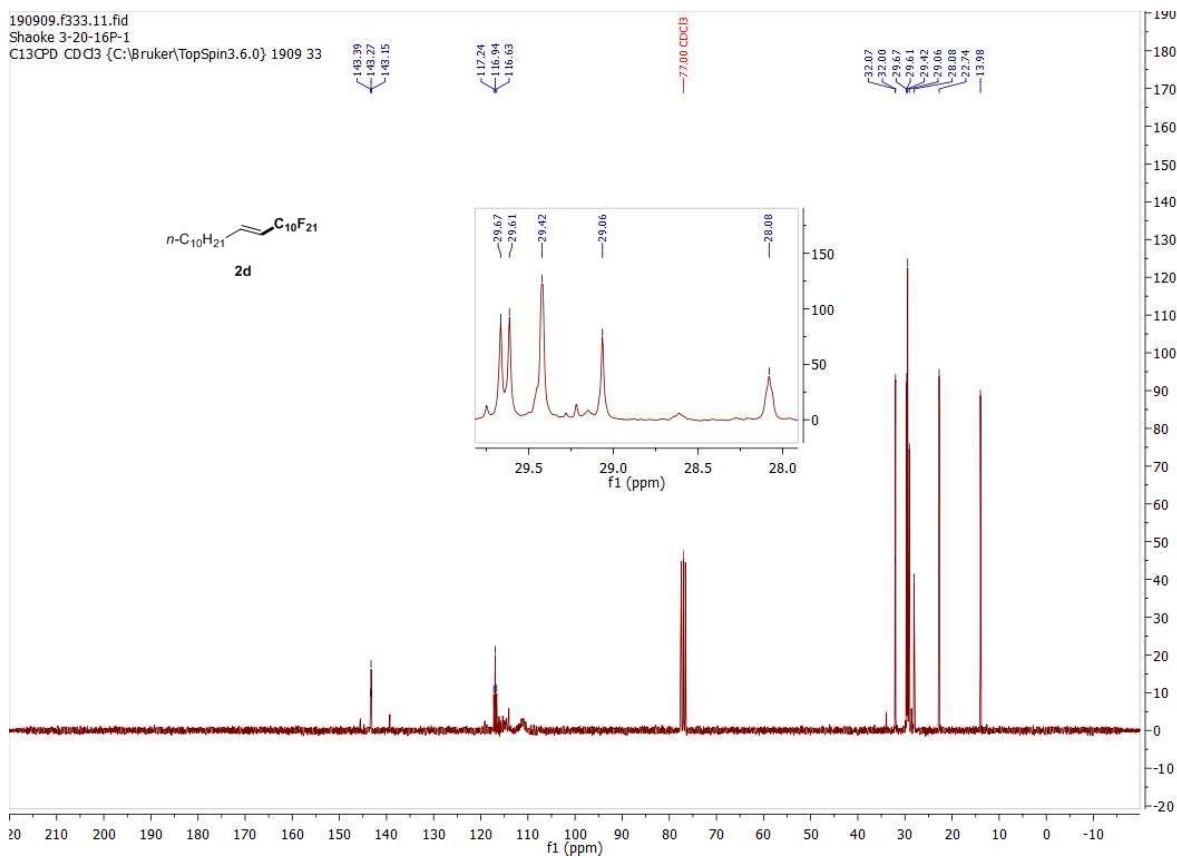

# SUPPORTING INFORMATION

190909.f333.12.fid  
 Shaoke 3-20-16P-1  
 19F-quant CDCl3 {C:\Bruker\TopSpin3.6.0} 1909 33

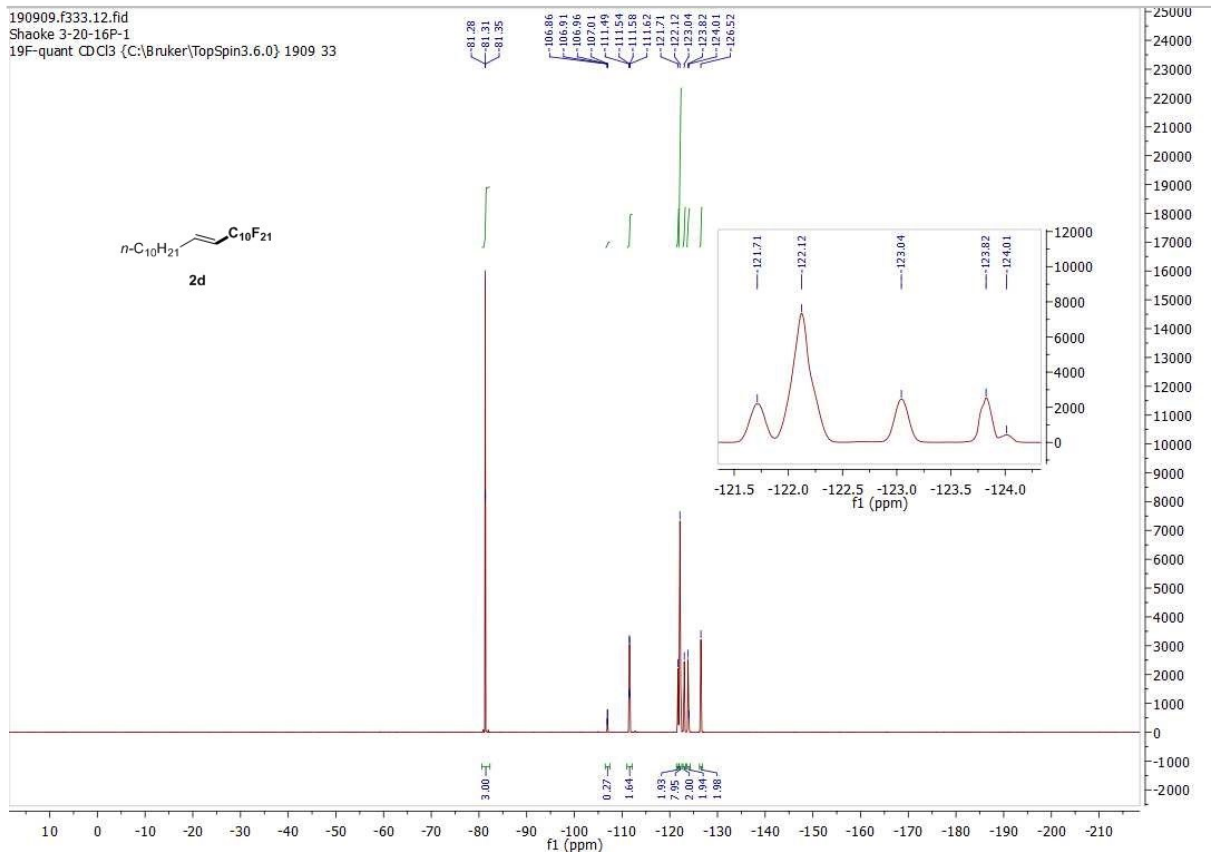

181210.311.10.fid  
 Shaoke 3-8-58-3  
 Au1H CDCl3 {C:\Bruker\TopSpin3.5pl6} 1812 11

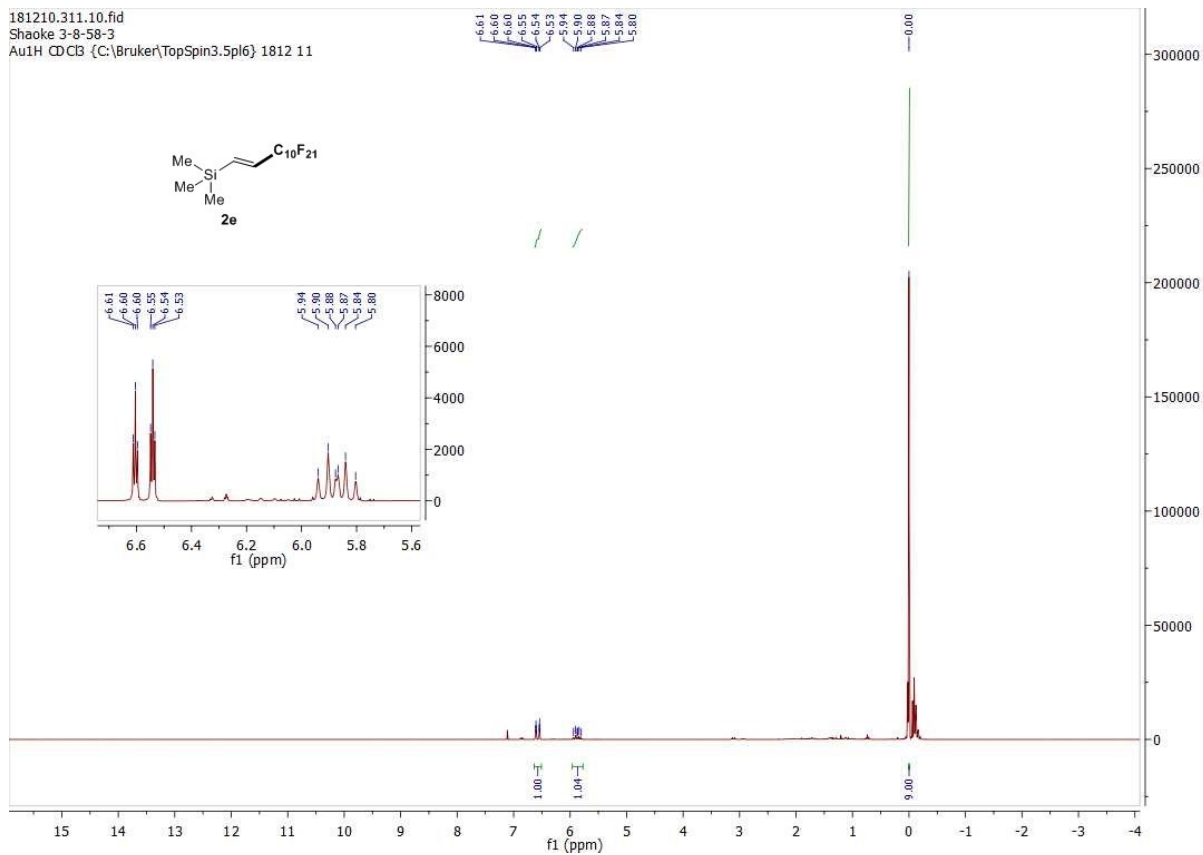

# SUPPORTING INFORMATION

181210.311.11.fid  
 Shaoke 3-8-58-3  
 Au13C CDCl3 {C:\Bruker\TopSpin3.5pl6} 1812 11

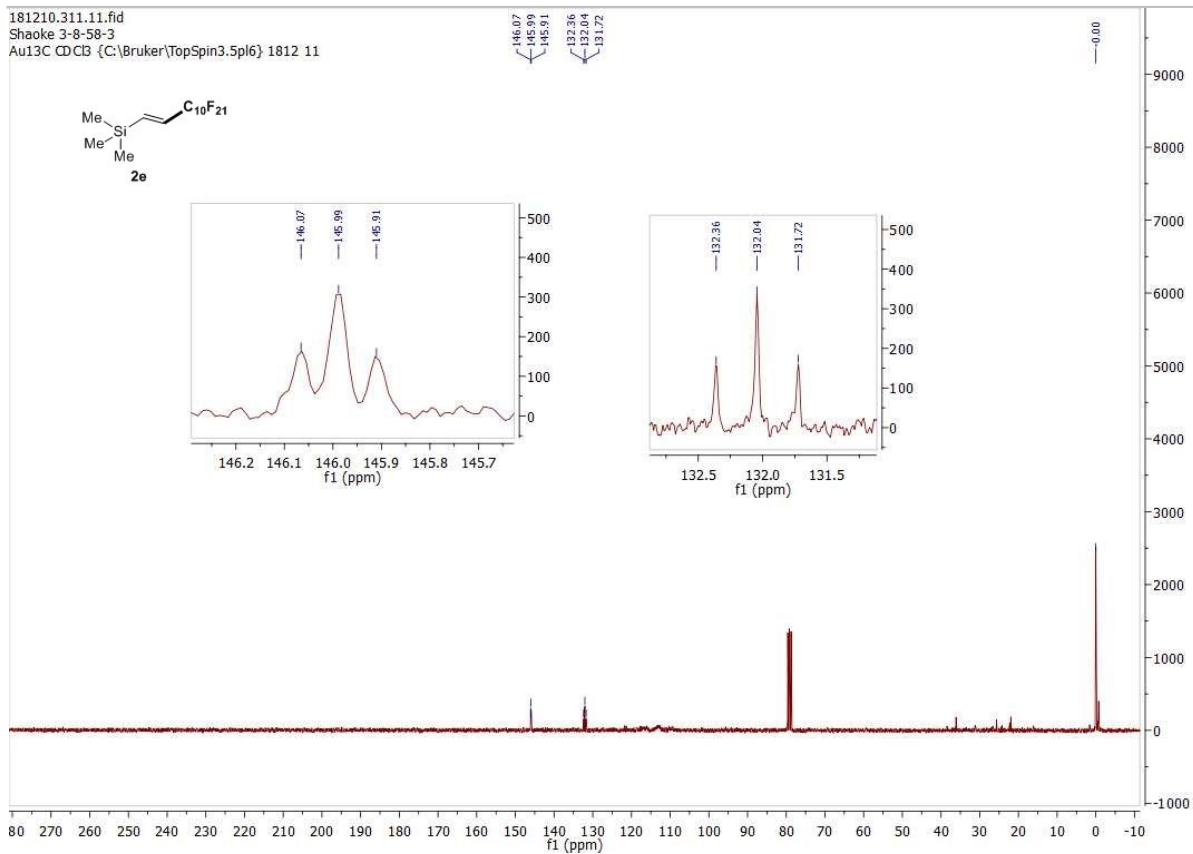

181210.311.12.fid  
 Shaoke 3-8-58-3  
 Au19F-quant CDCl3 {C:\Bruker\TopSpin3.5pl6} 1812 11

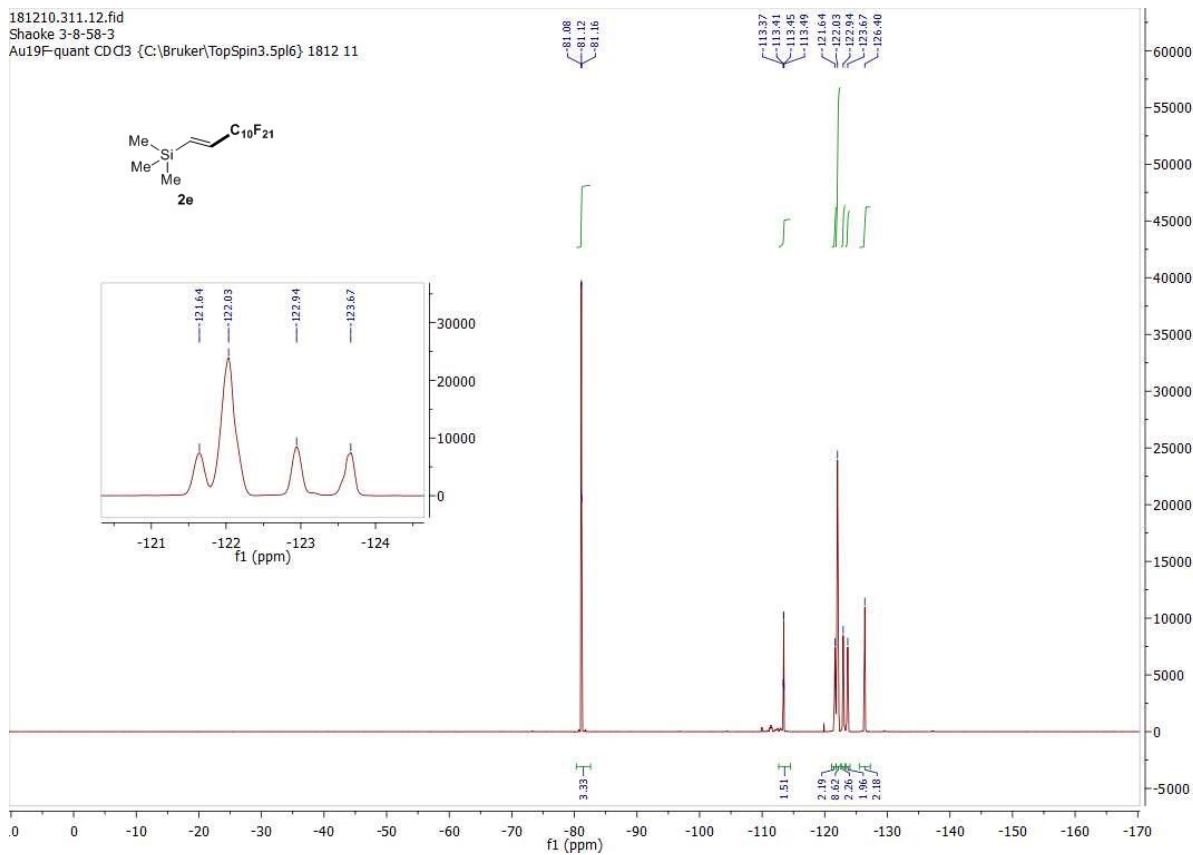

# SUPPORTING INFORMATION

180525.F305.10.fid  
Shaoke 2-2-110-2, 1H

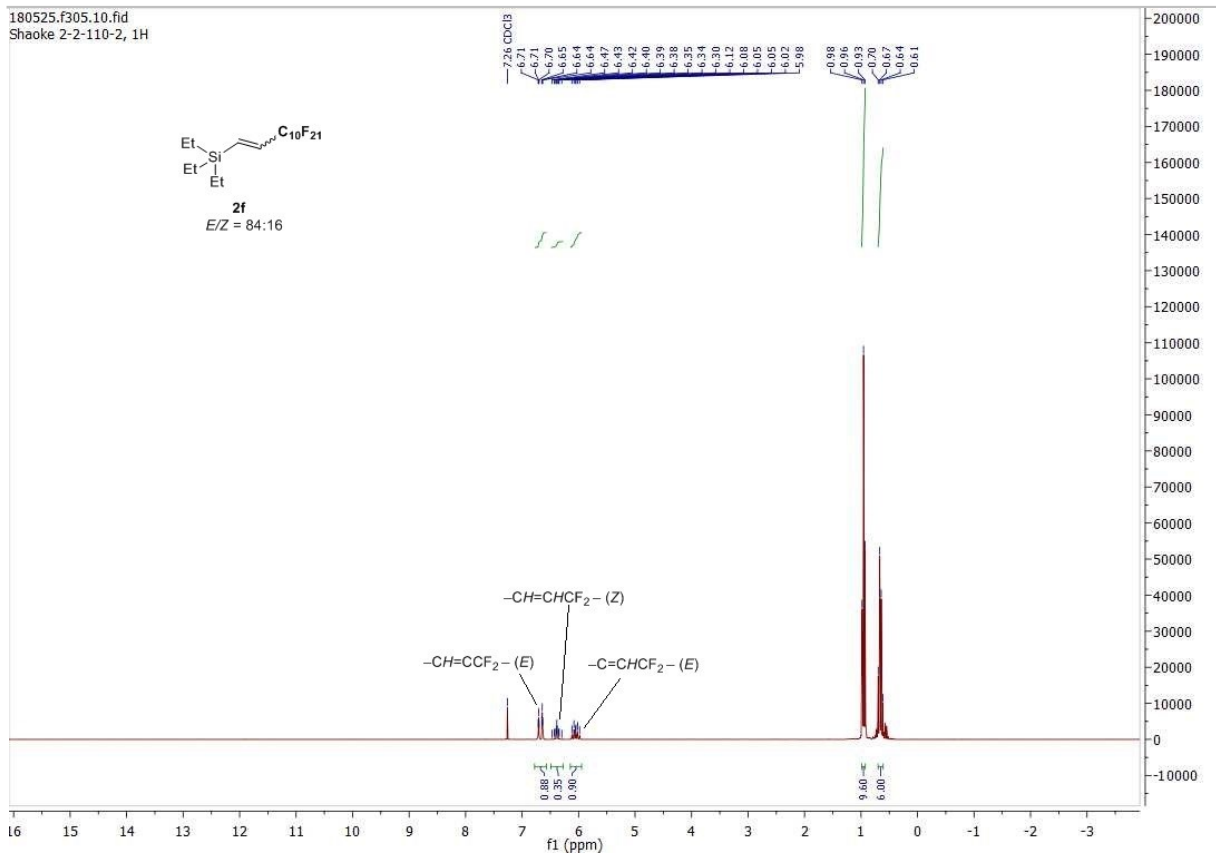

180525.F305.20.fid  
Shaoke 2-2-110-2, 19F

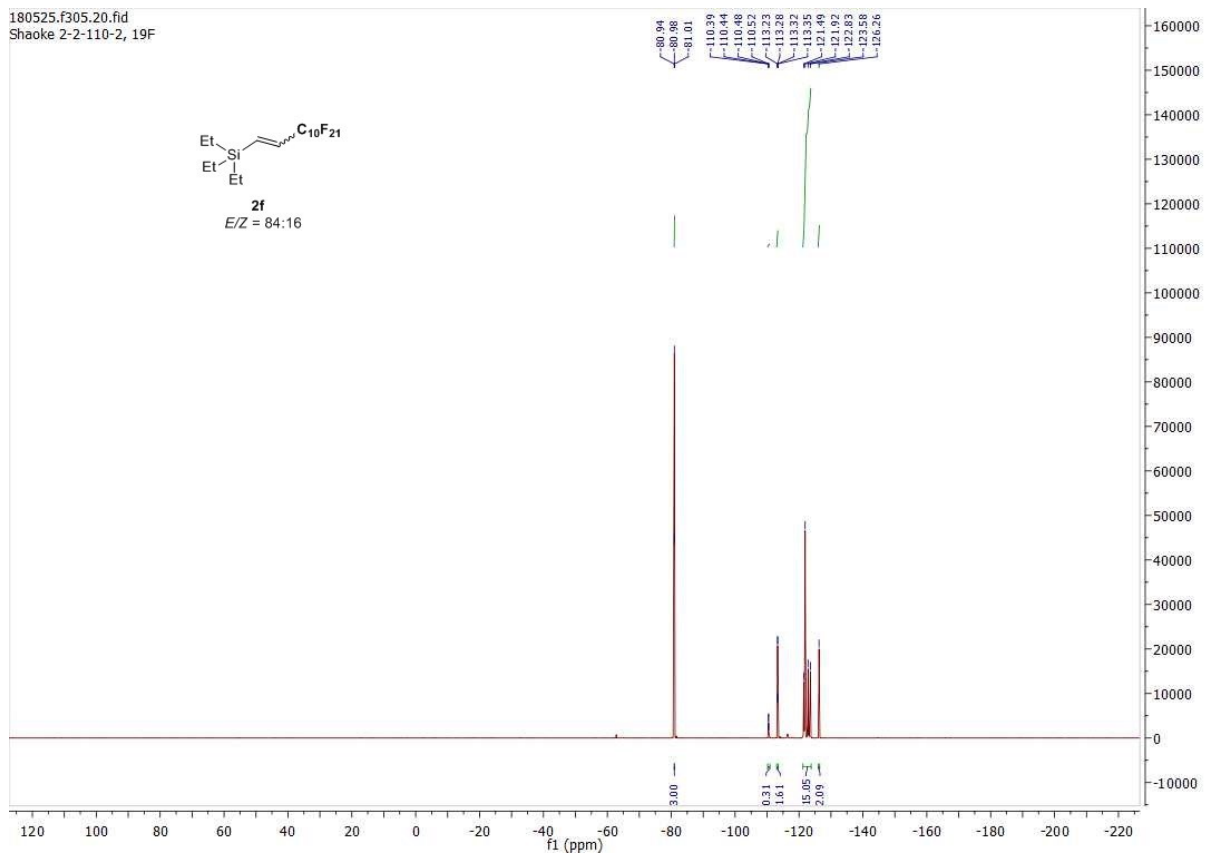



# SUPPORTING INFORMATION

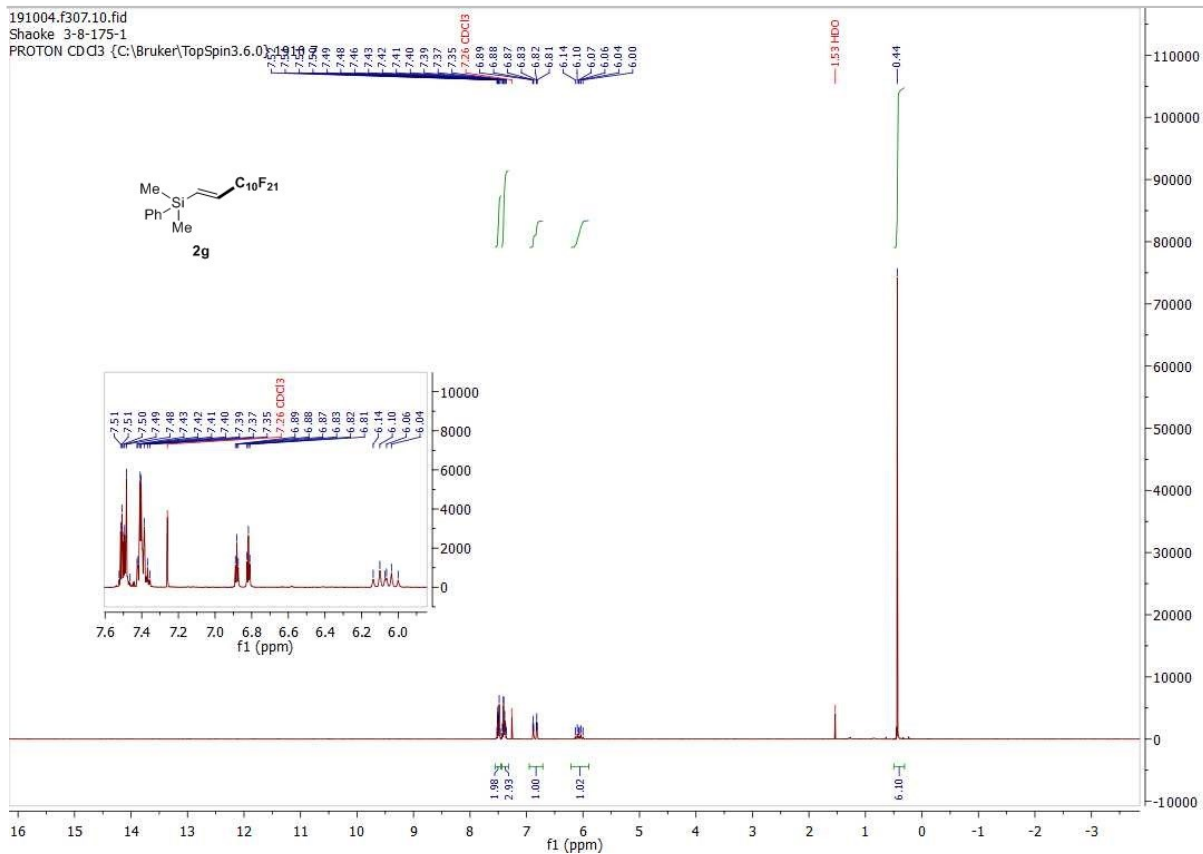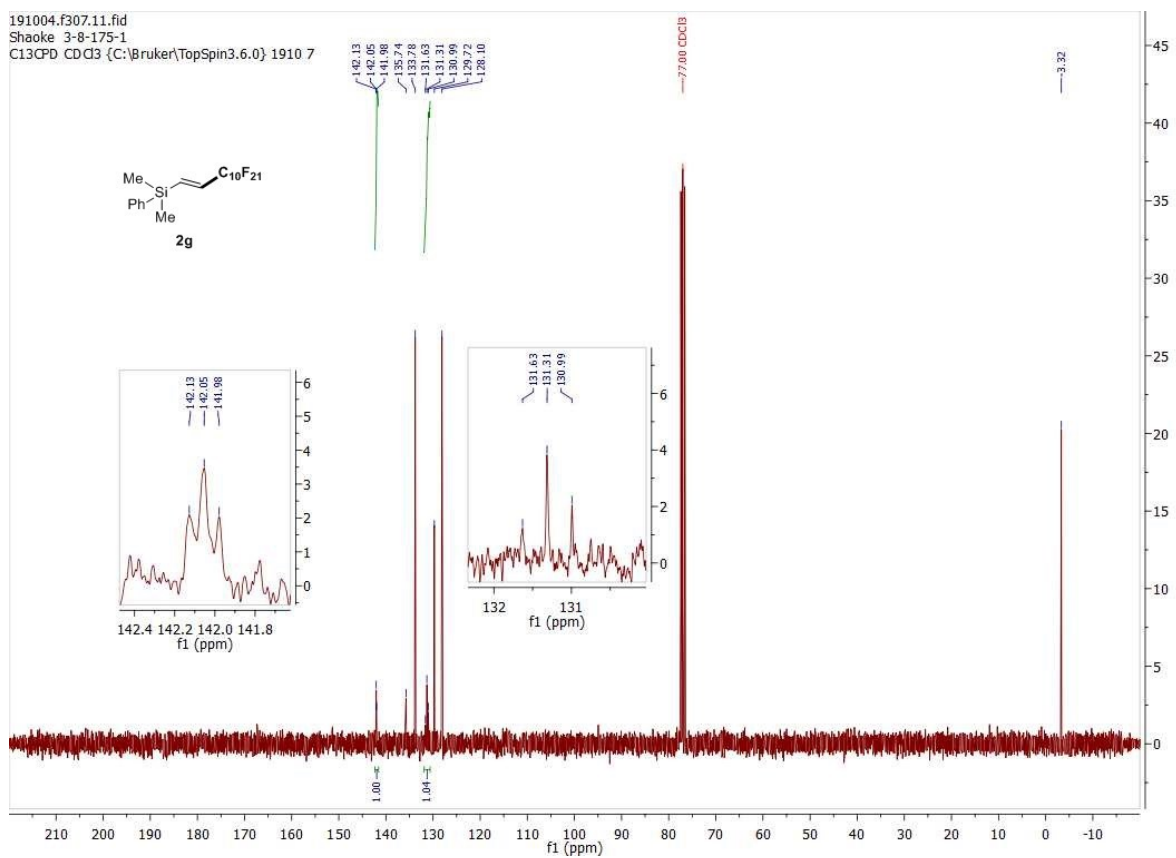

# SUPPORTING INFORMATION

191004.f307.12.fid  
 Shaoke 3-8-175-1  
 19F-quant CDCl3 {C:\Bruker\TopSpin3.6.0} 1910 7

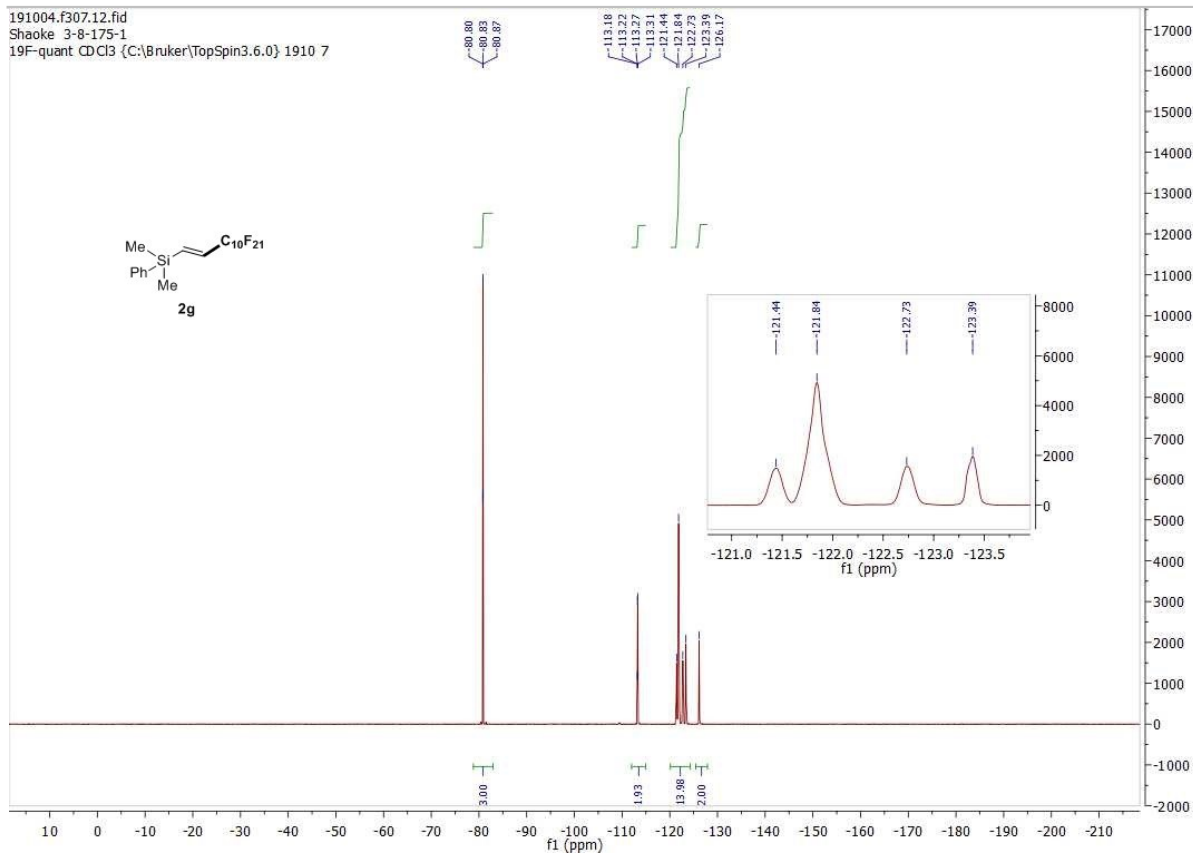

190514.f301.10.fid  
 Shaoke 3-8-143-1  
 PROTON CDCl3 {C:\Bruker\TopSpin3.6.0} 1905 1

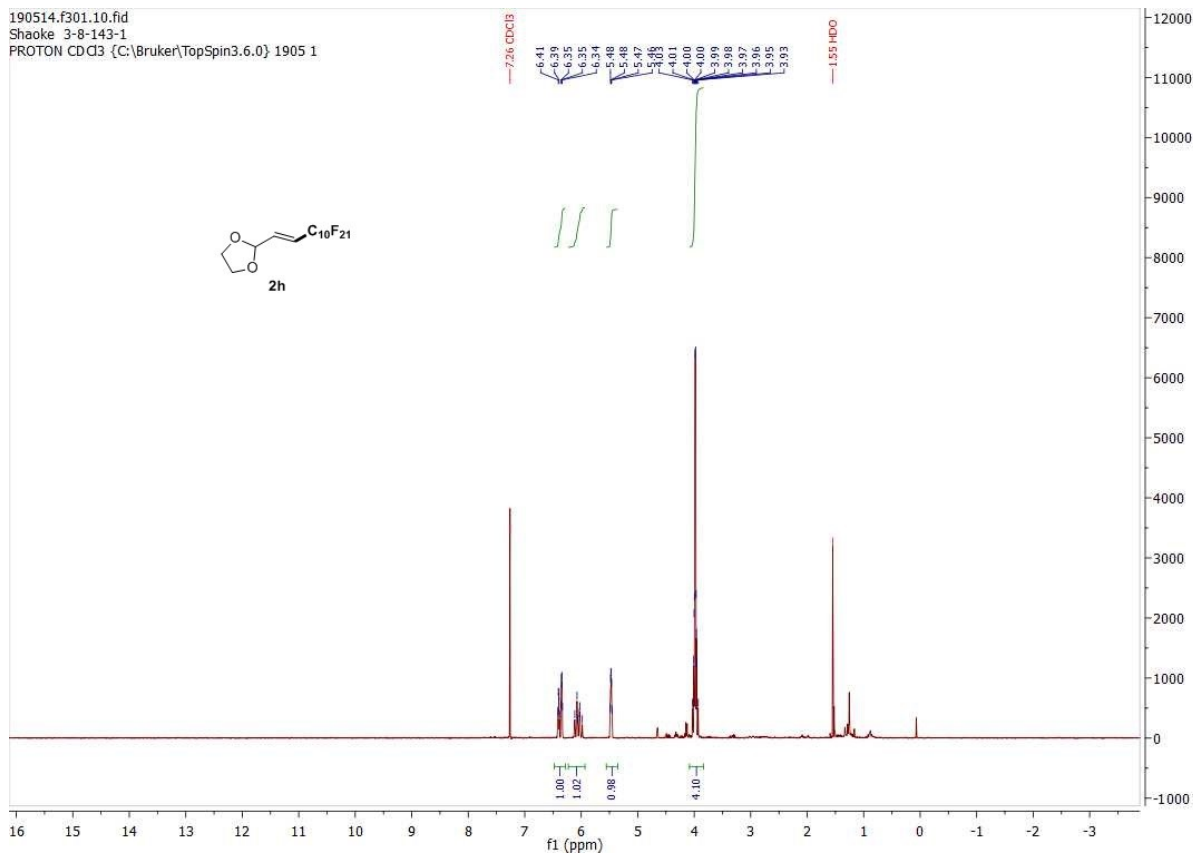



# SUPPORTING INFORMATION

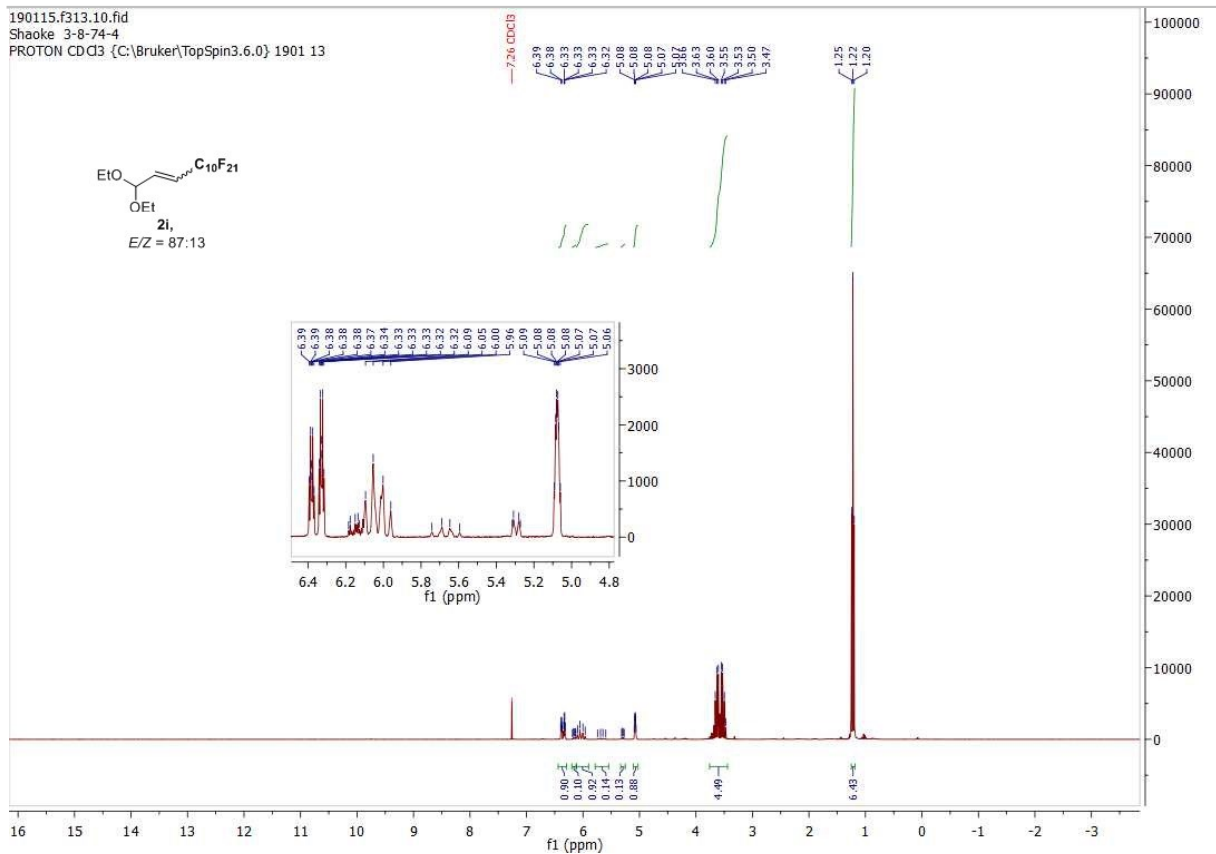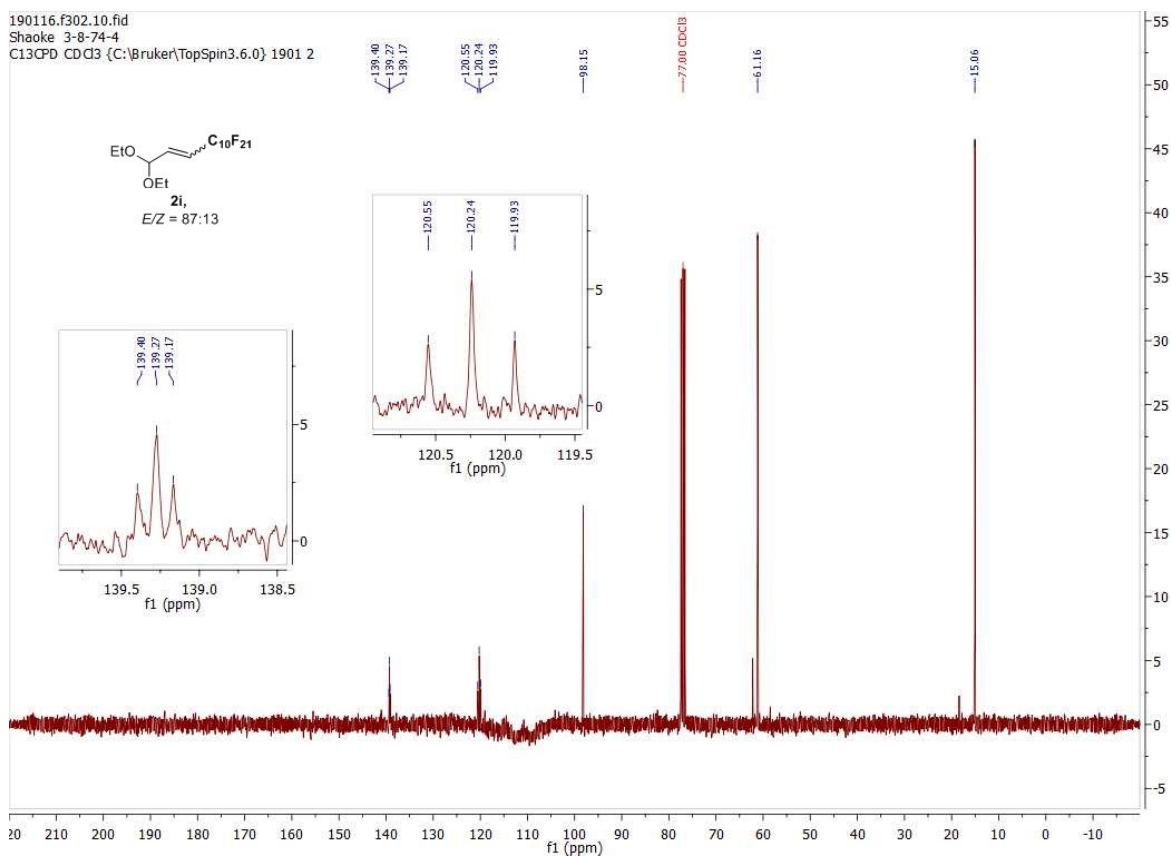

# SUPPORTING INFORMATION

190116.f302.12.fid  
 Shaoke 3-8-74-4  
 F19 CDCl3 {C:\Bruker\TopSpin3.6.0} 1901 2

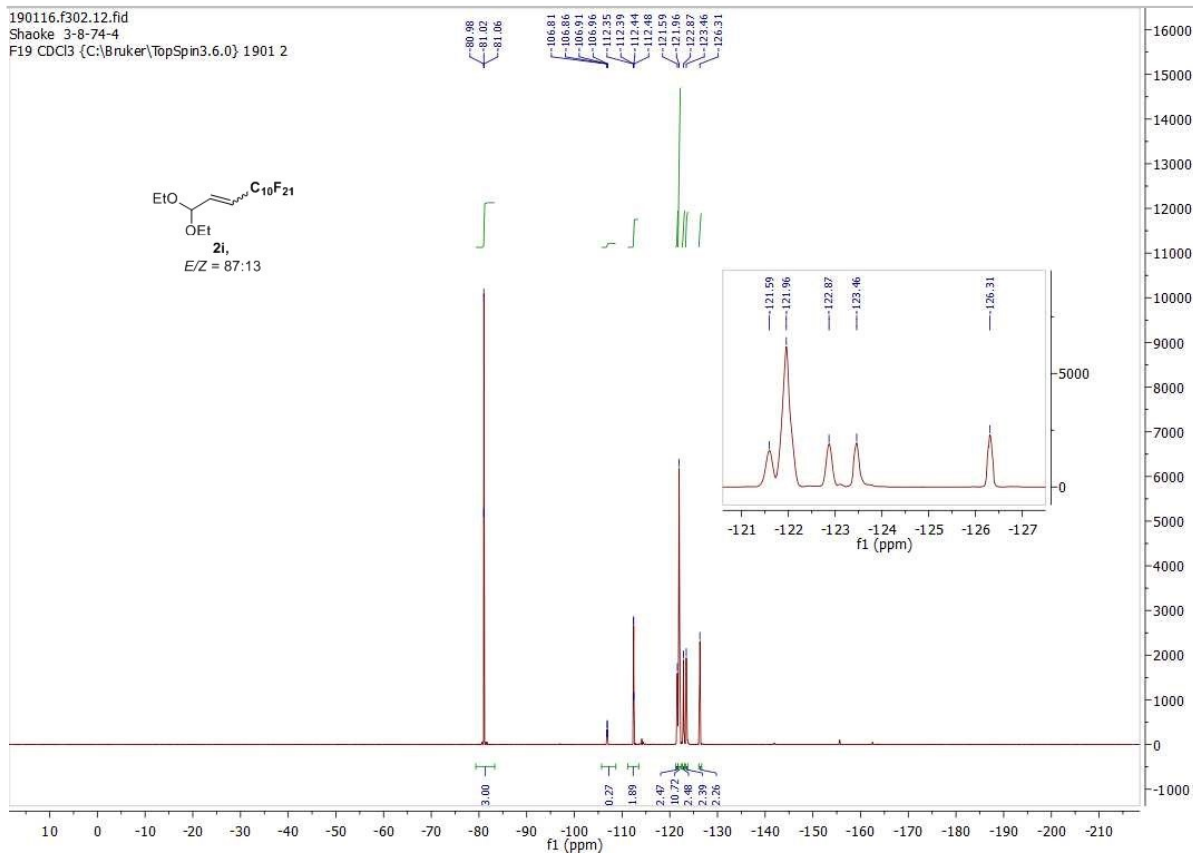

190313.f301.10.fid  
 Shaoke 3-8-107-4  
 PROTON CDCl3 {C:\Bruker\TopSpin3.6.0} 1903 1

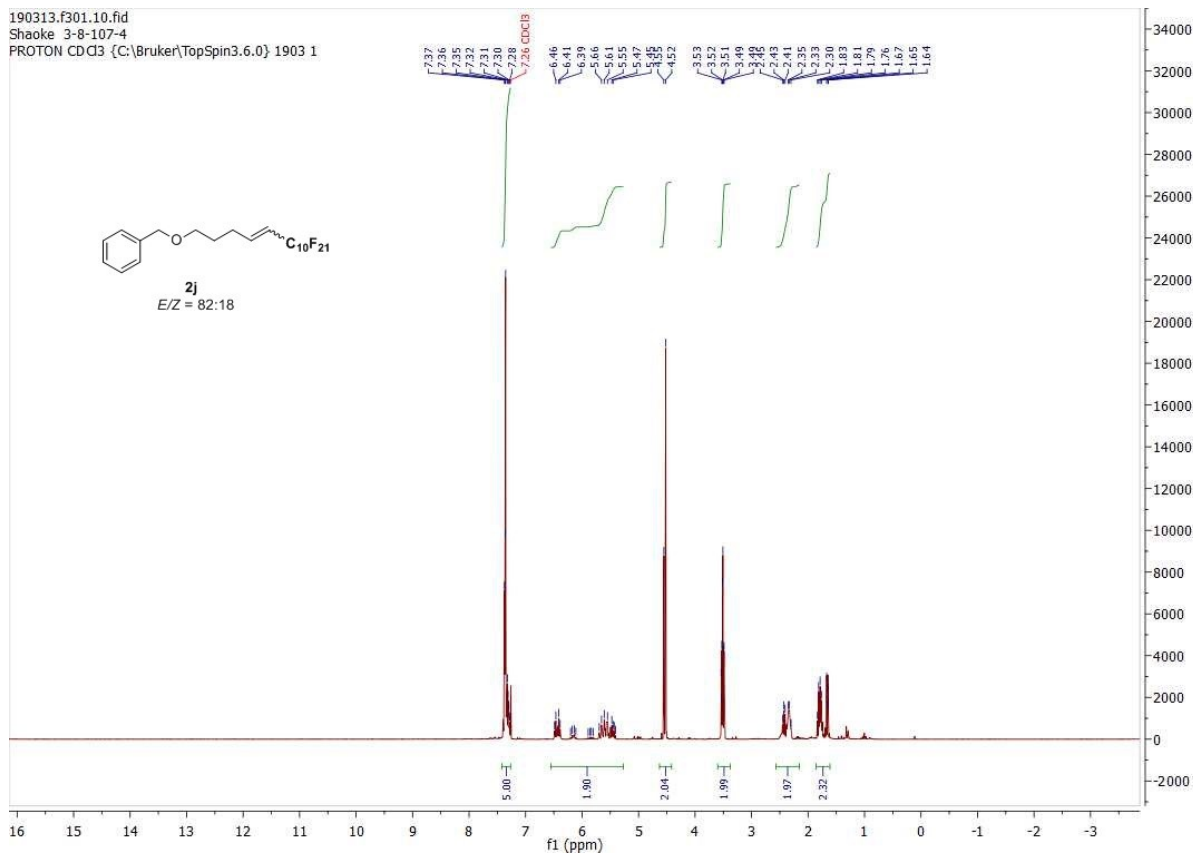

# SUPPORTING INFORMATION

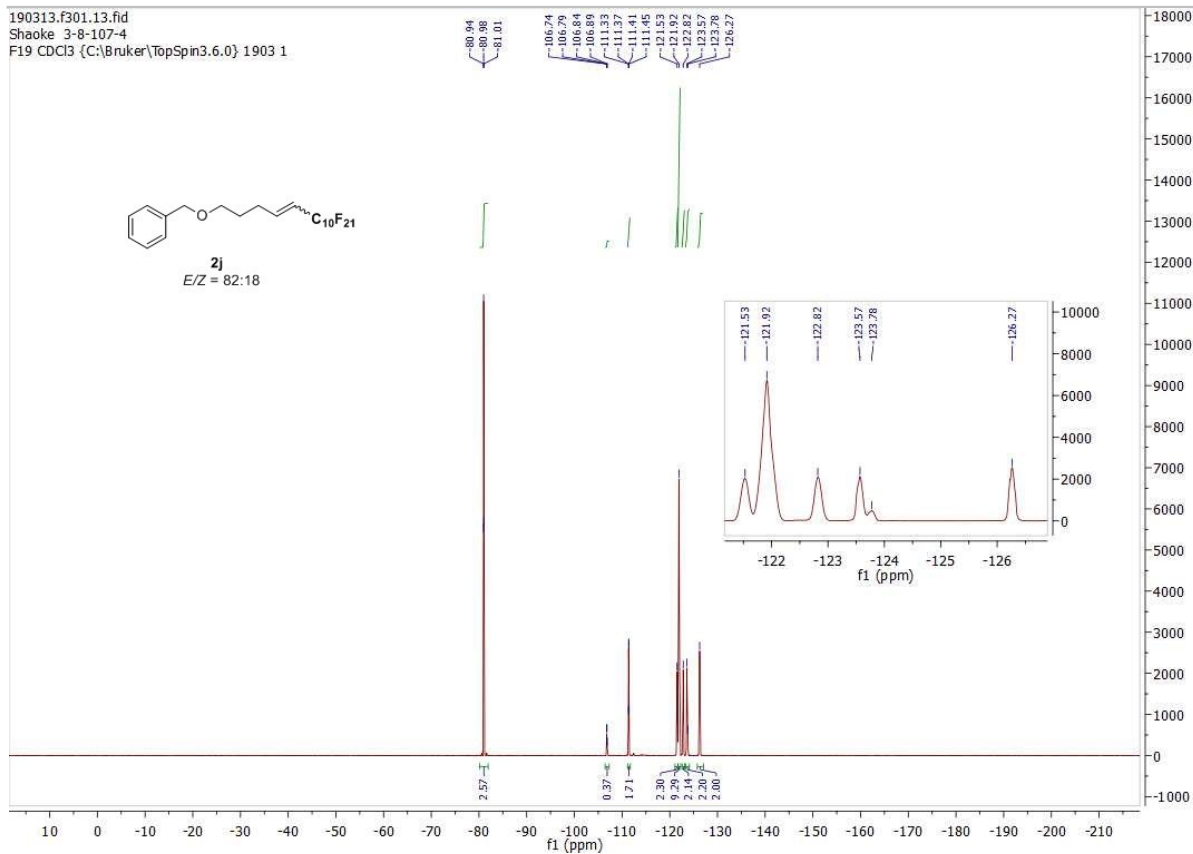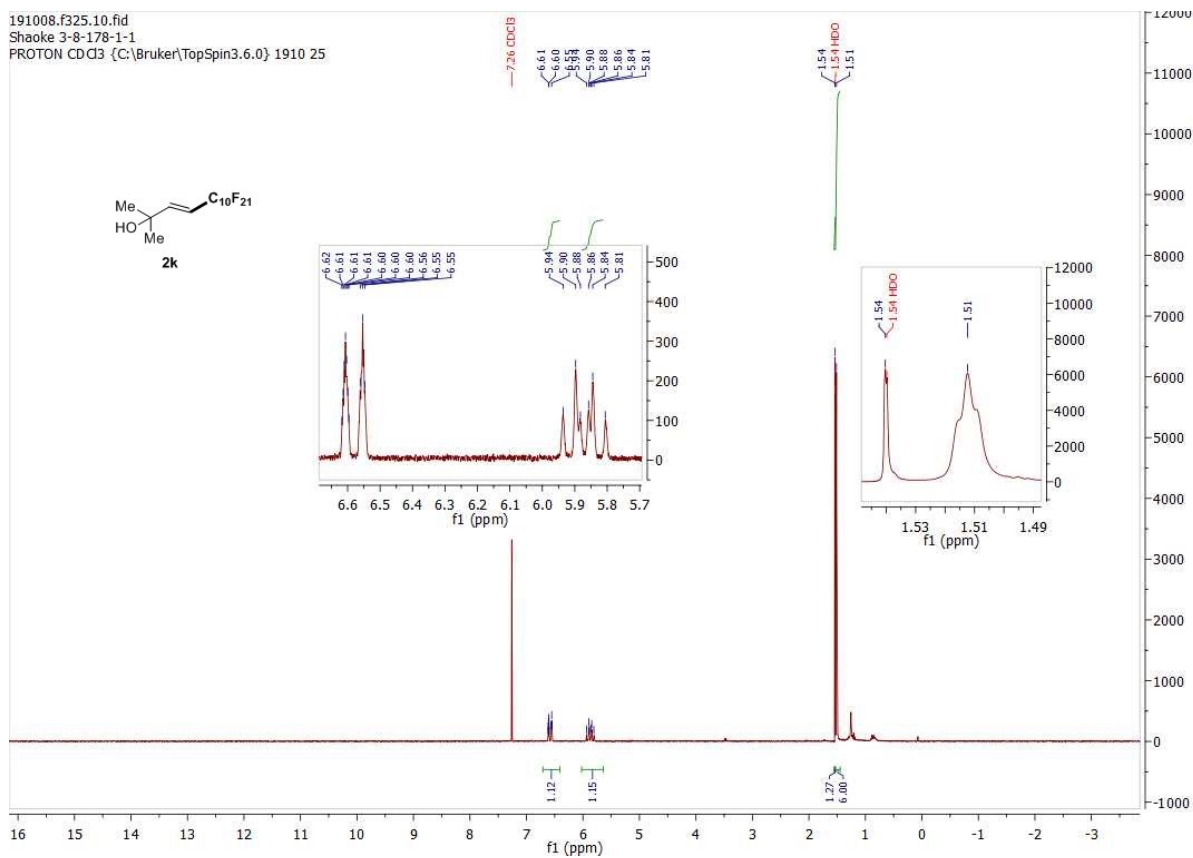

# SUPPORTING INFORMATION

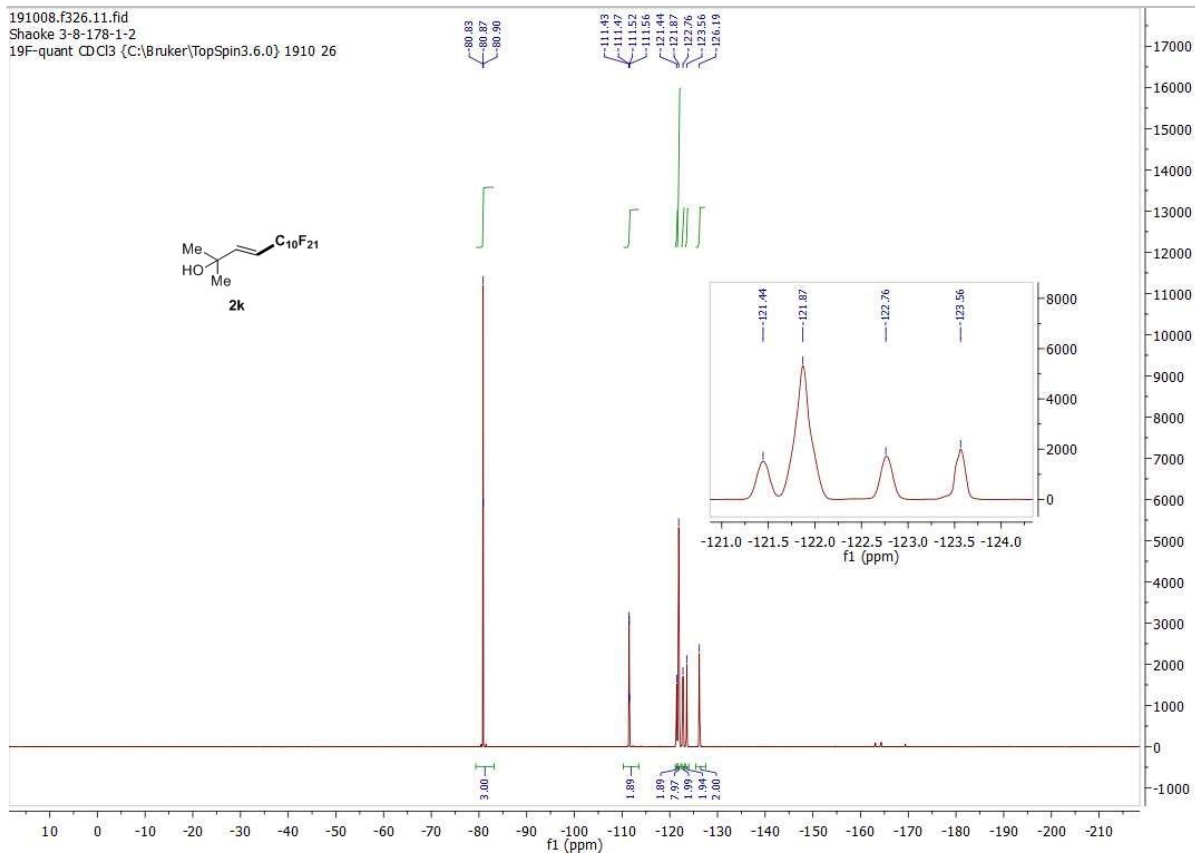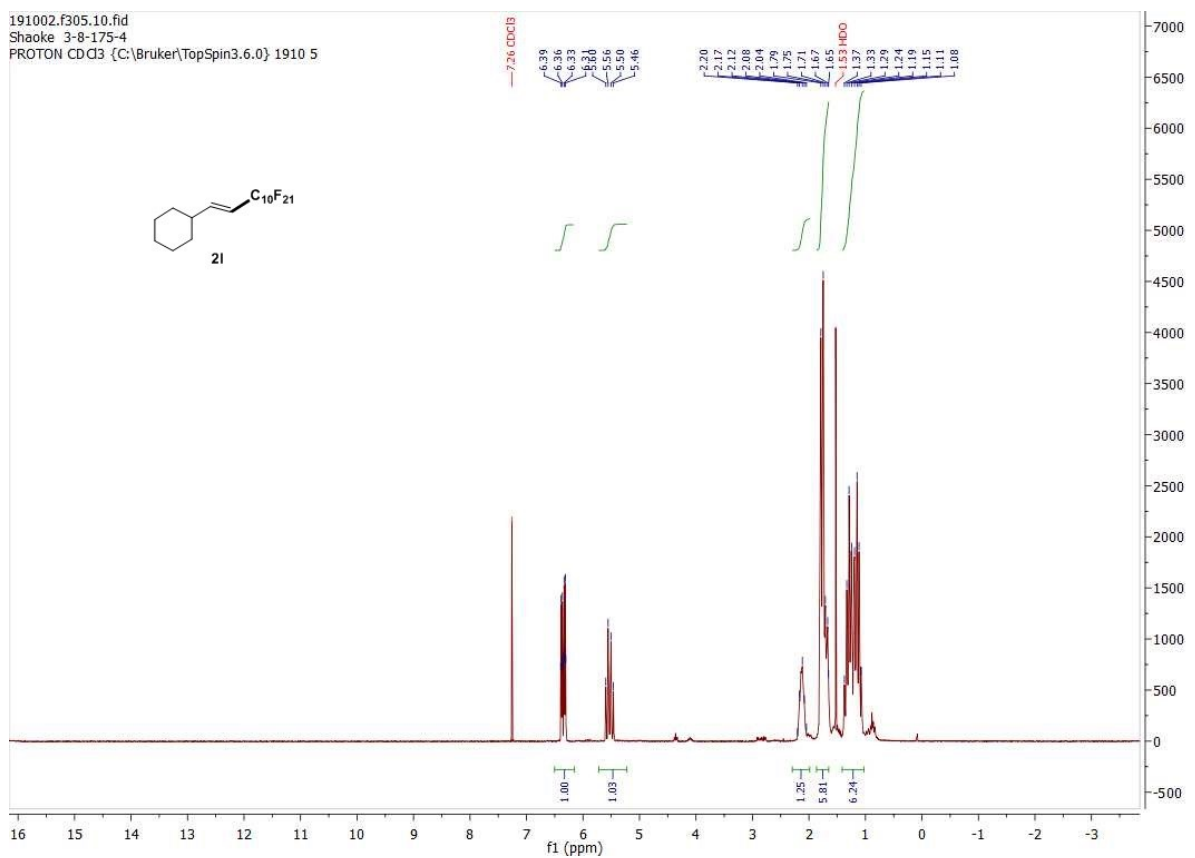



# SUPPORTING INFORMATION

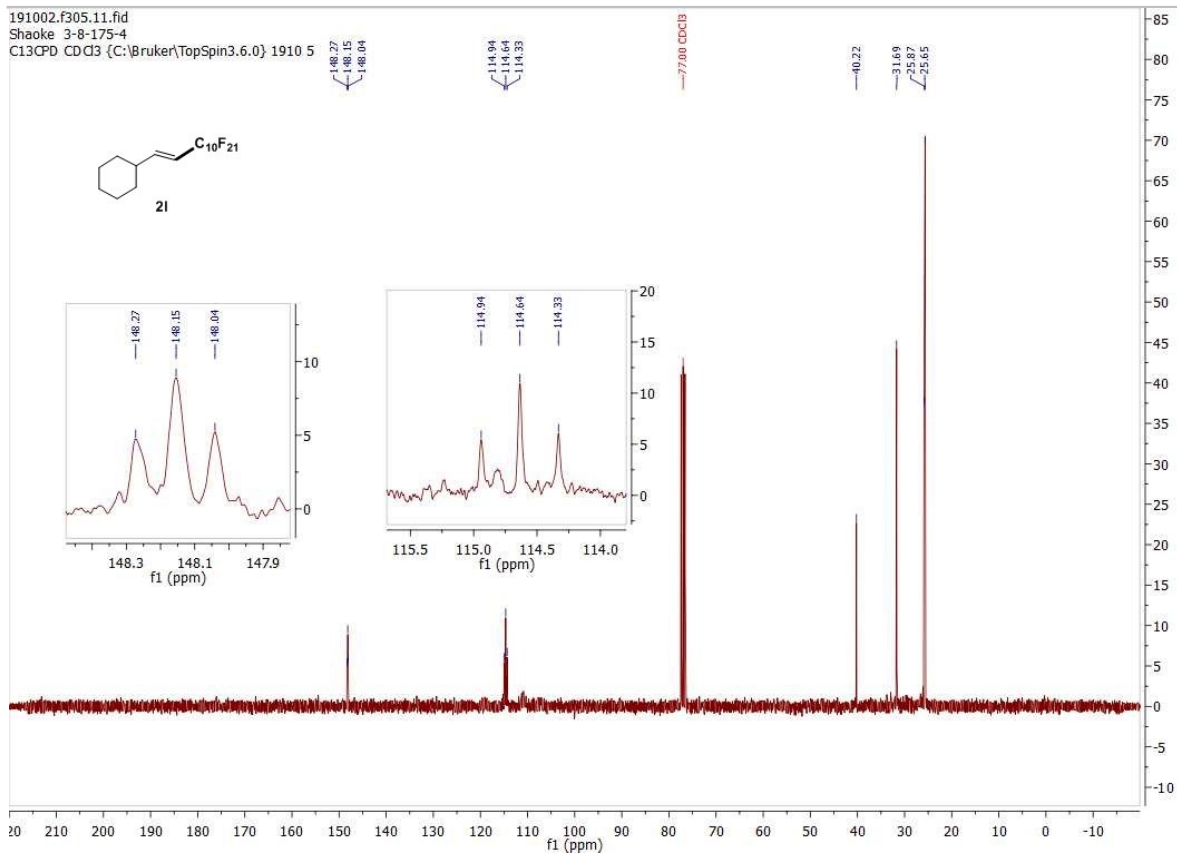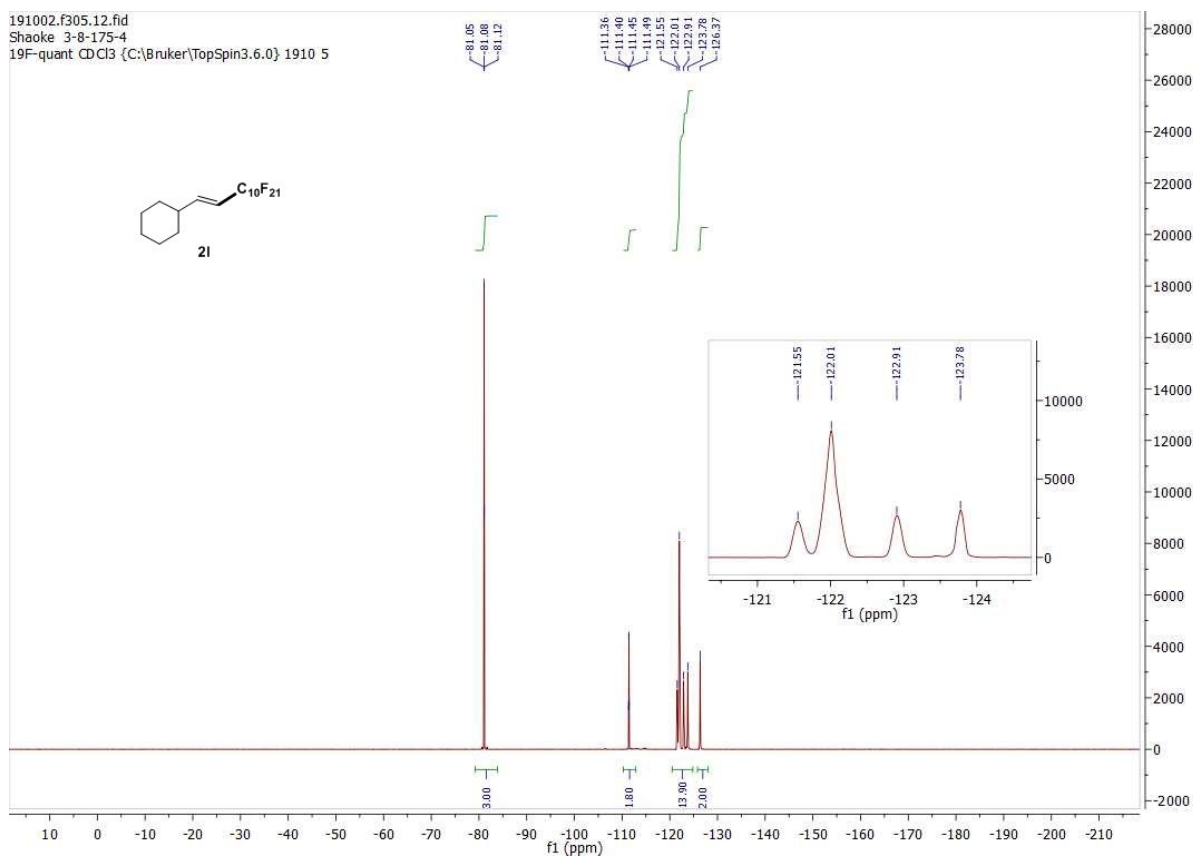





# SUPPORTING INFORMATION

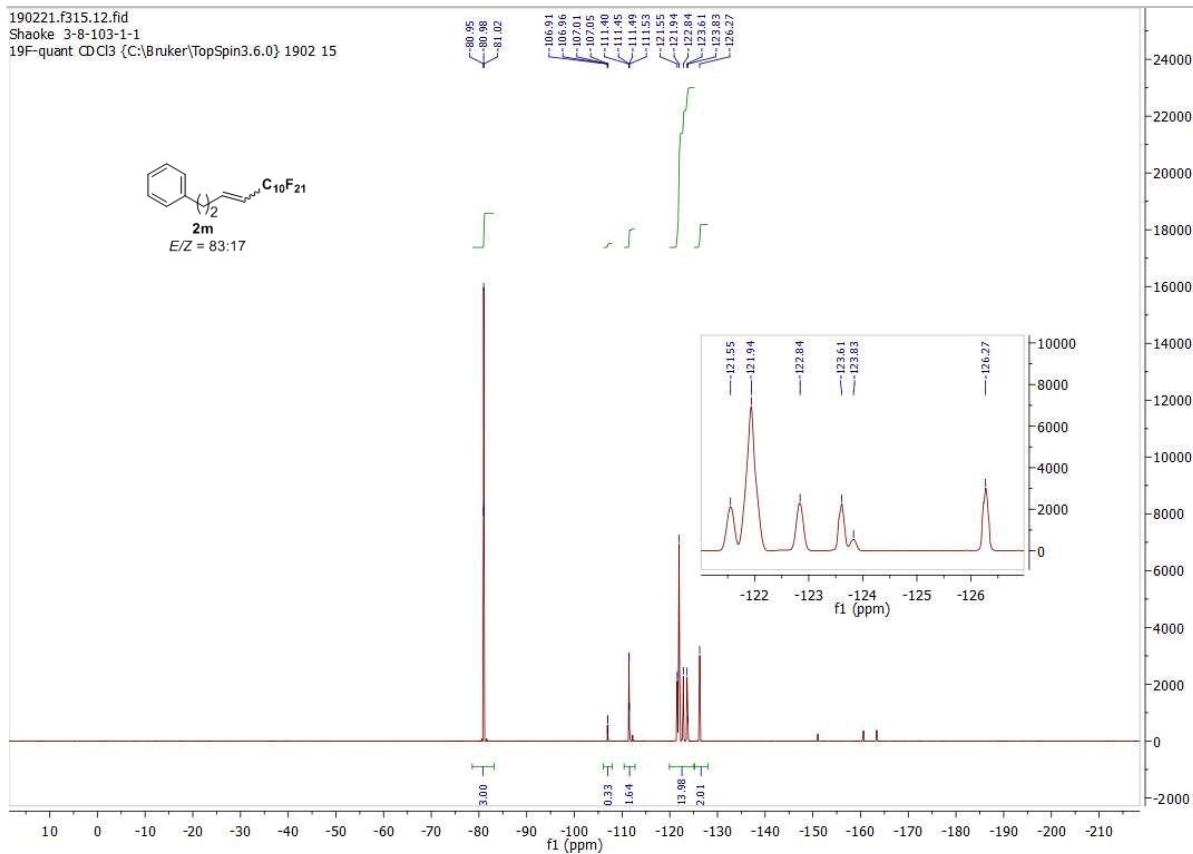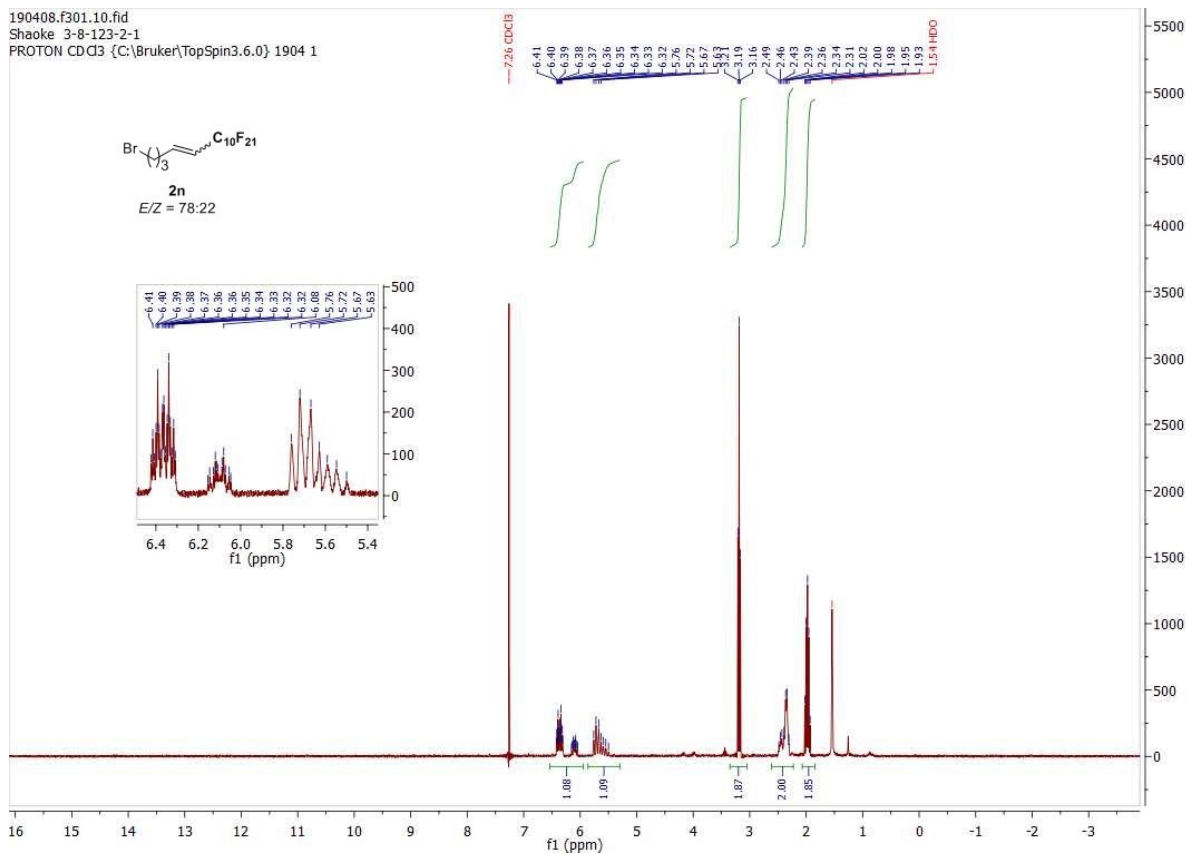

# SUPPORTING INFORMATION

190408.f301.11.fid  
 Shaoke 3-8-123-2-1  
 19F-quant CDCl3 {C:\Bruker\TopSpin3.6.0} 1904 1

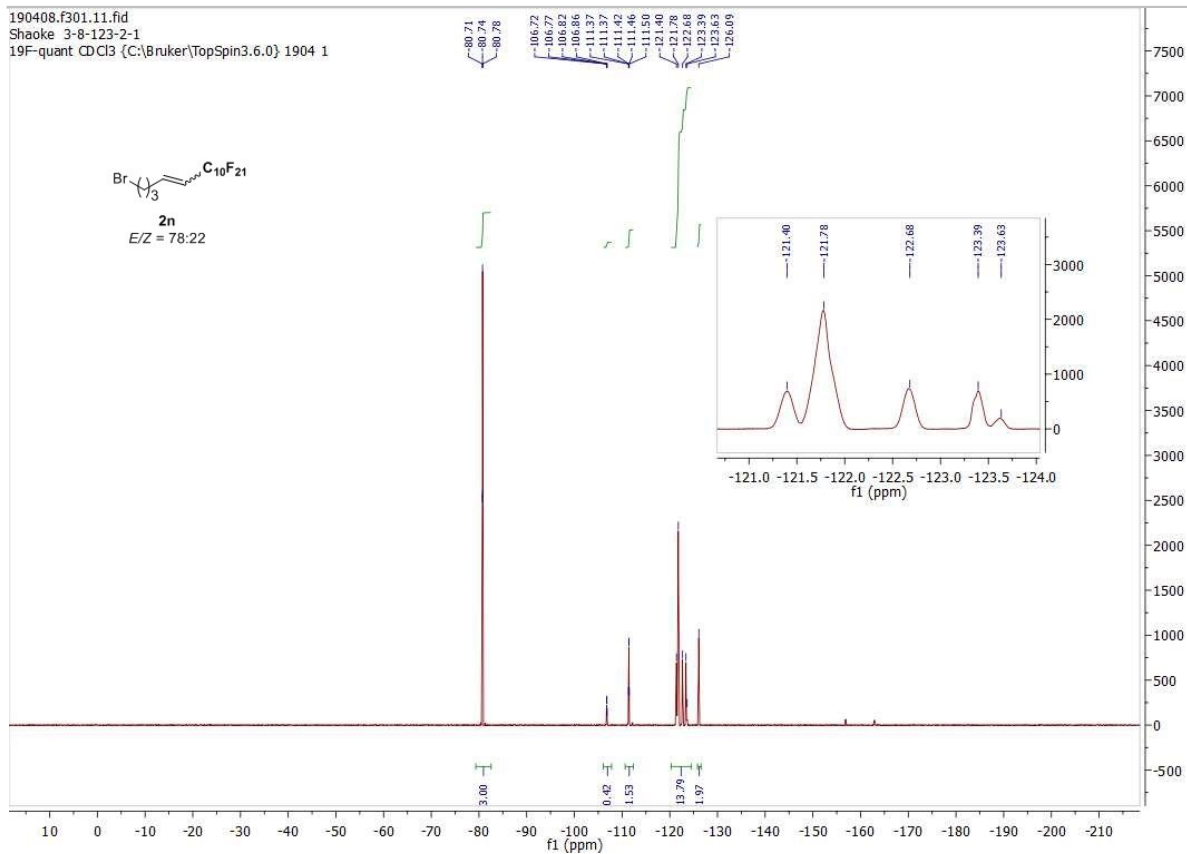

191014.f312.10.fid  
 Shaoke 3-8-181-2  
 PROTON CDCl3 {C:\Bruker\TopSpin3.6.0} 1910 12

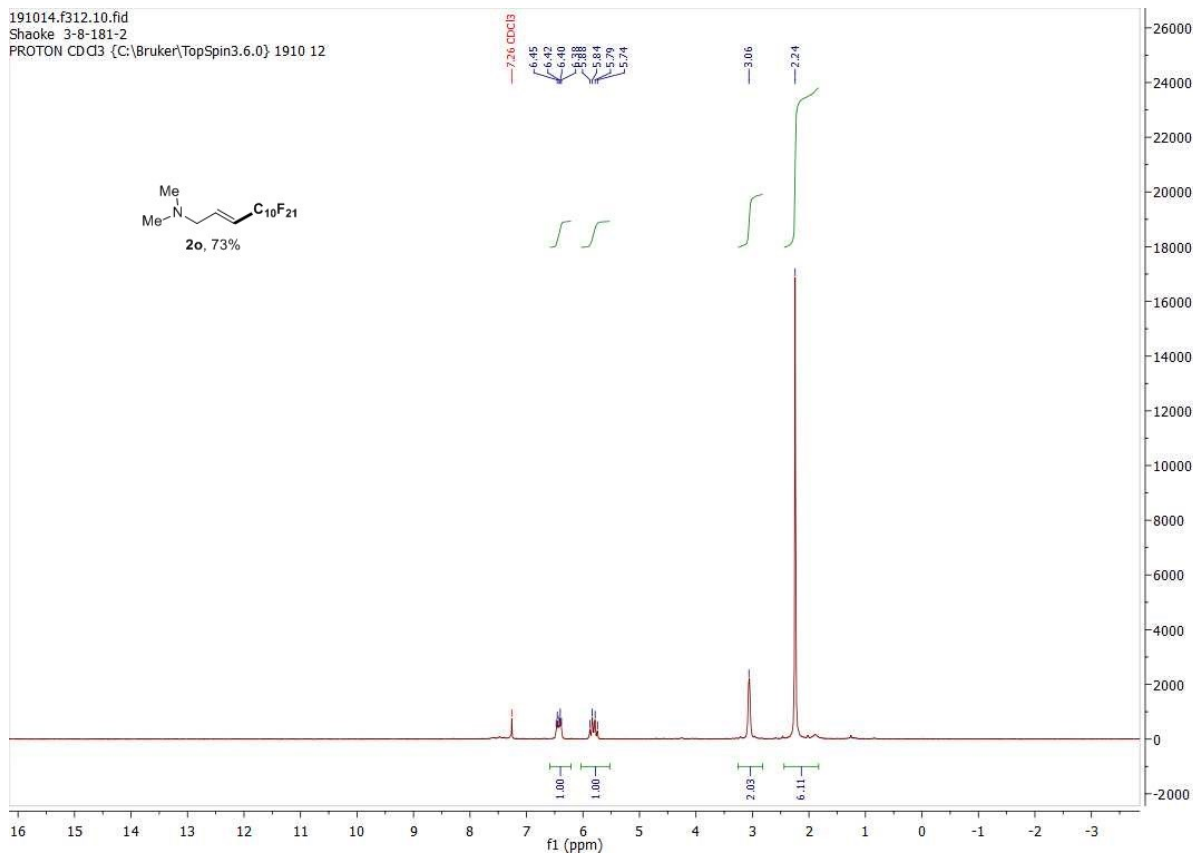

# SUPPORTING INFORMATION

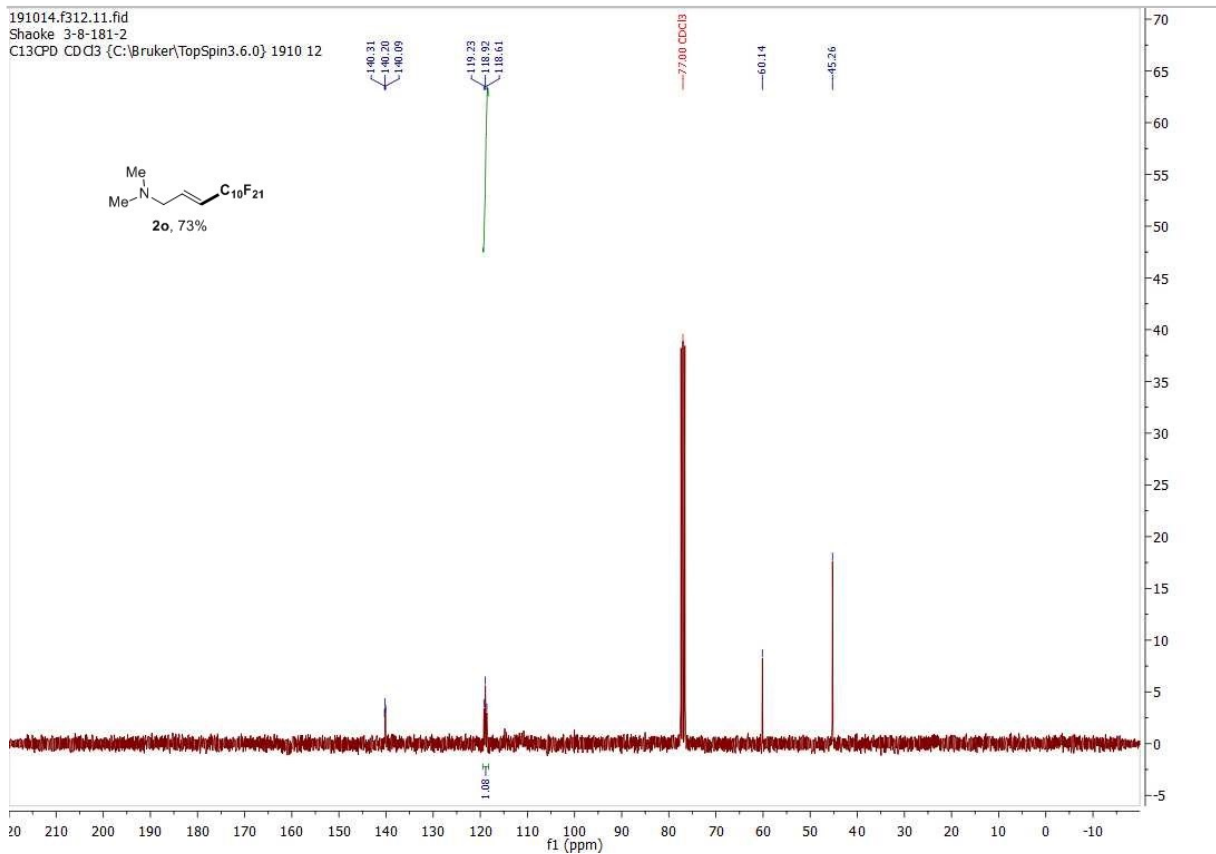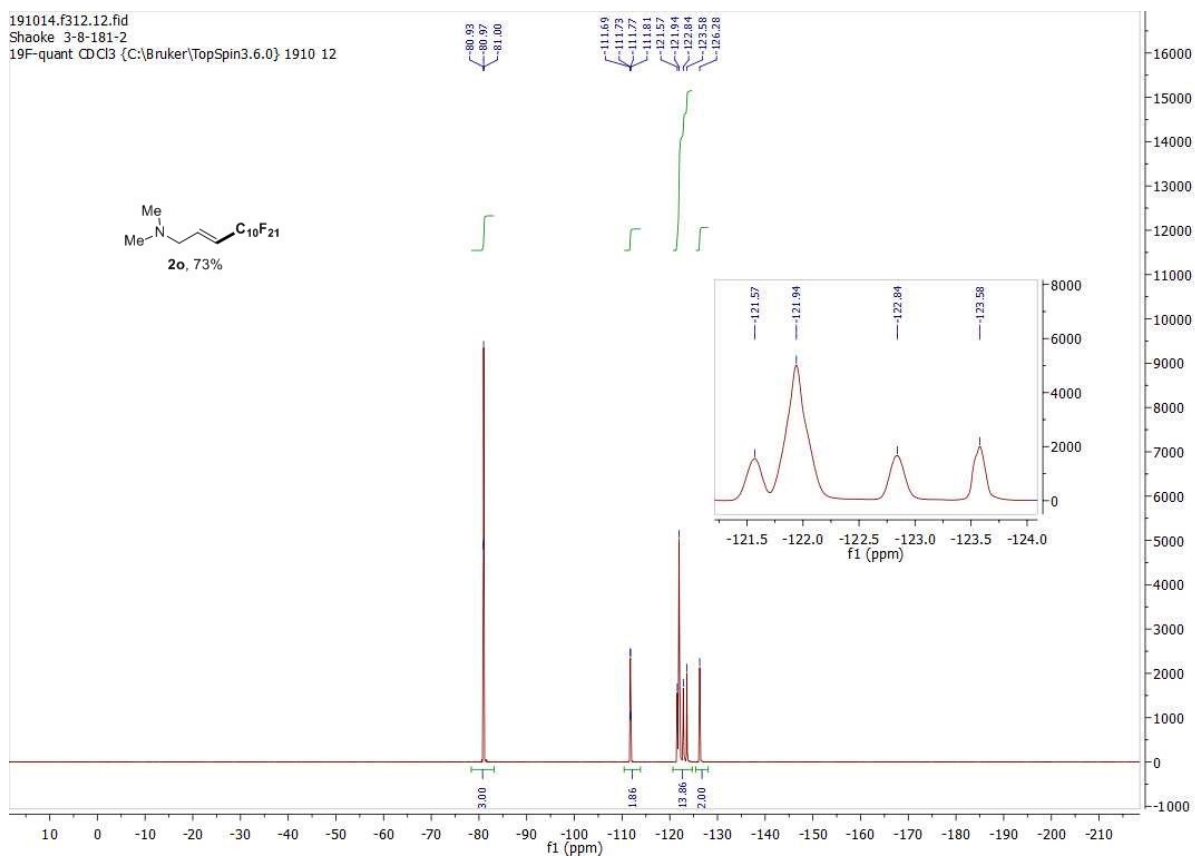

# SUPPORTING INFORMATION

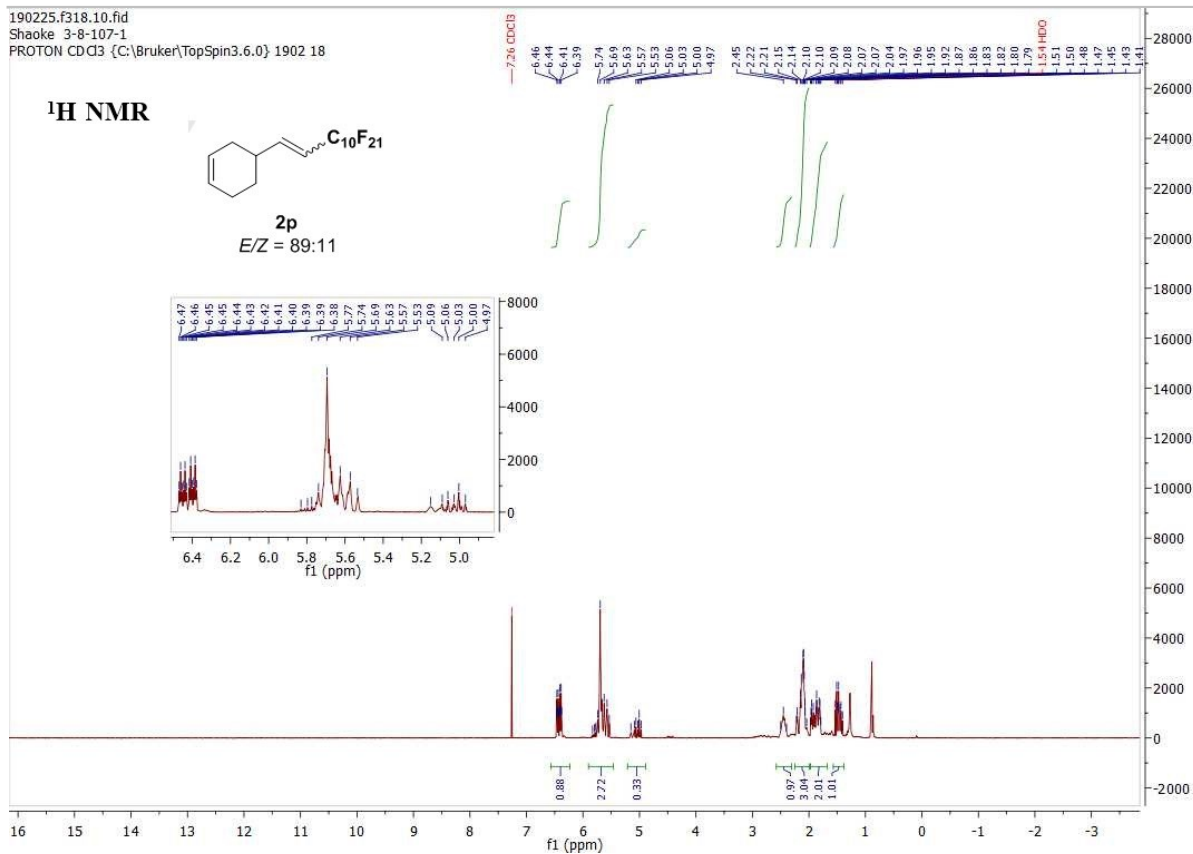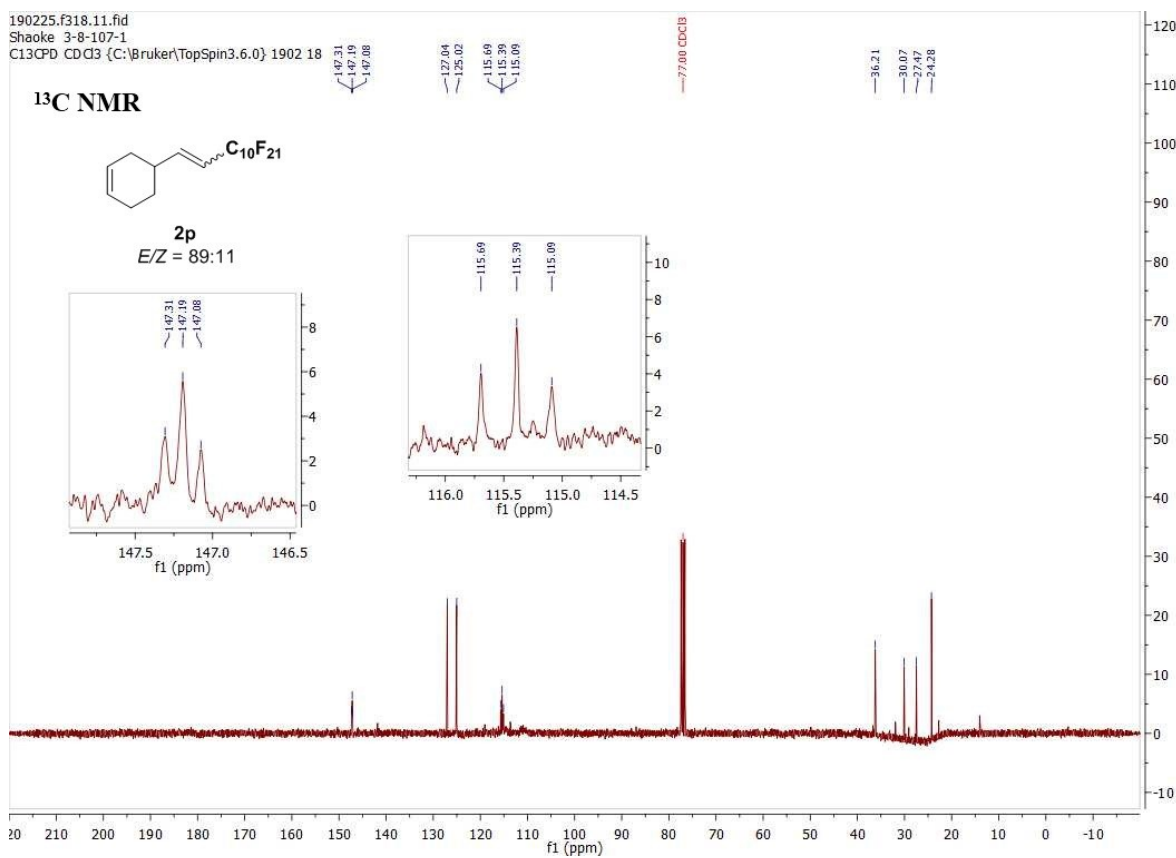

# SUPPORTING INFORMATION

190225.f318.12.fid  
 Shaoke 3-8-107-1  
 19F-quant CDCl3 {C:\Bruker\TopSpin3.6.0} 1902 18

## <sup>19</sup>F NMR

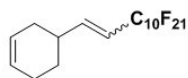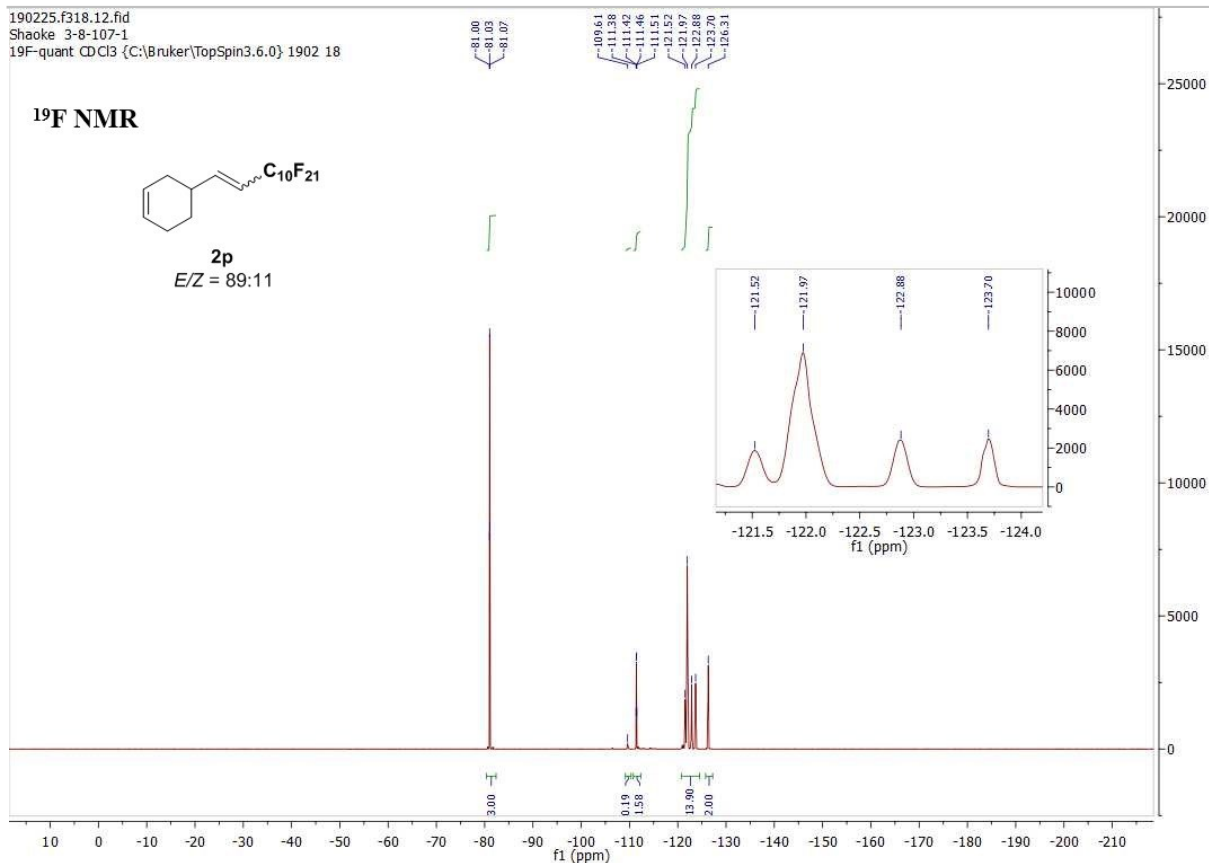

180504.f344.10.fid  
 Shaoke 2-2-99-3-1  
 PROTON CDCl3 {C:\Bruker\TopSpin3.5pl6} 1805 44

## <sup>1</sup>H NMR

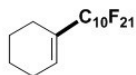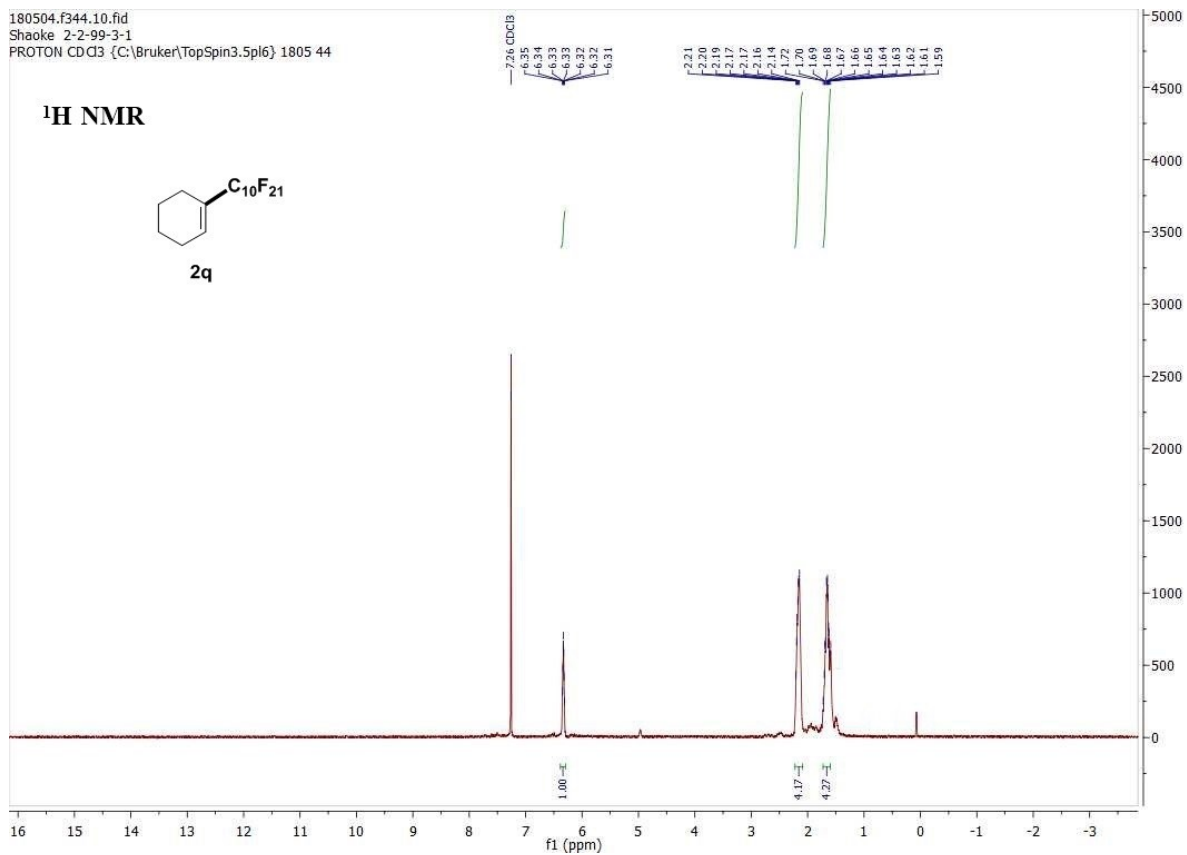





# SUPPORTING INFORMATION

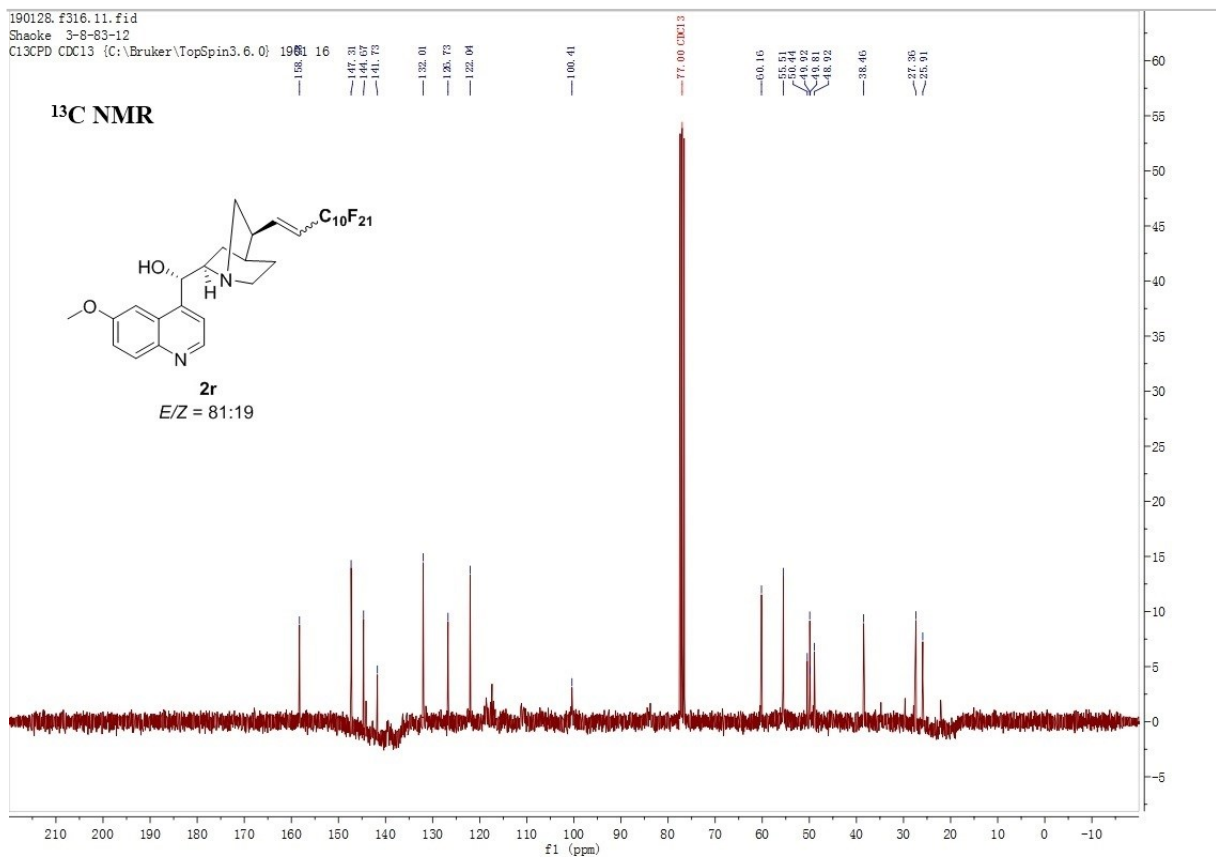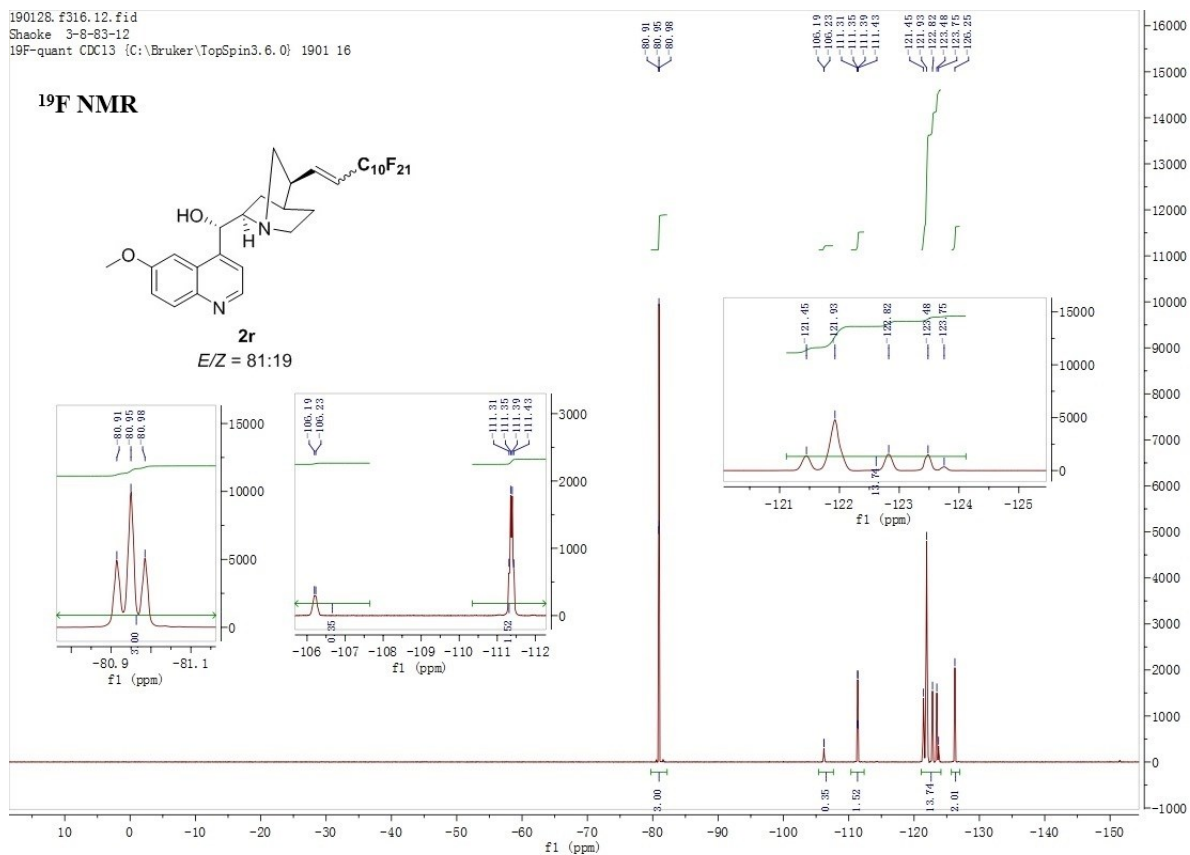



# SUPPORTING INFORMATION

190503.F314.10.fid  
 Shaok 3-8-131  
 PROTON CDCl<sub>3</sub> {C:\Bruker\TopSpin3.6.0} 1905 14

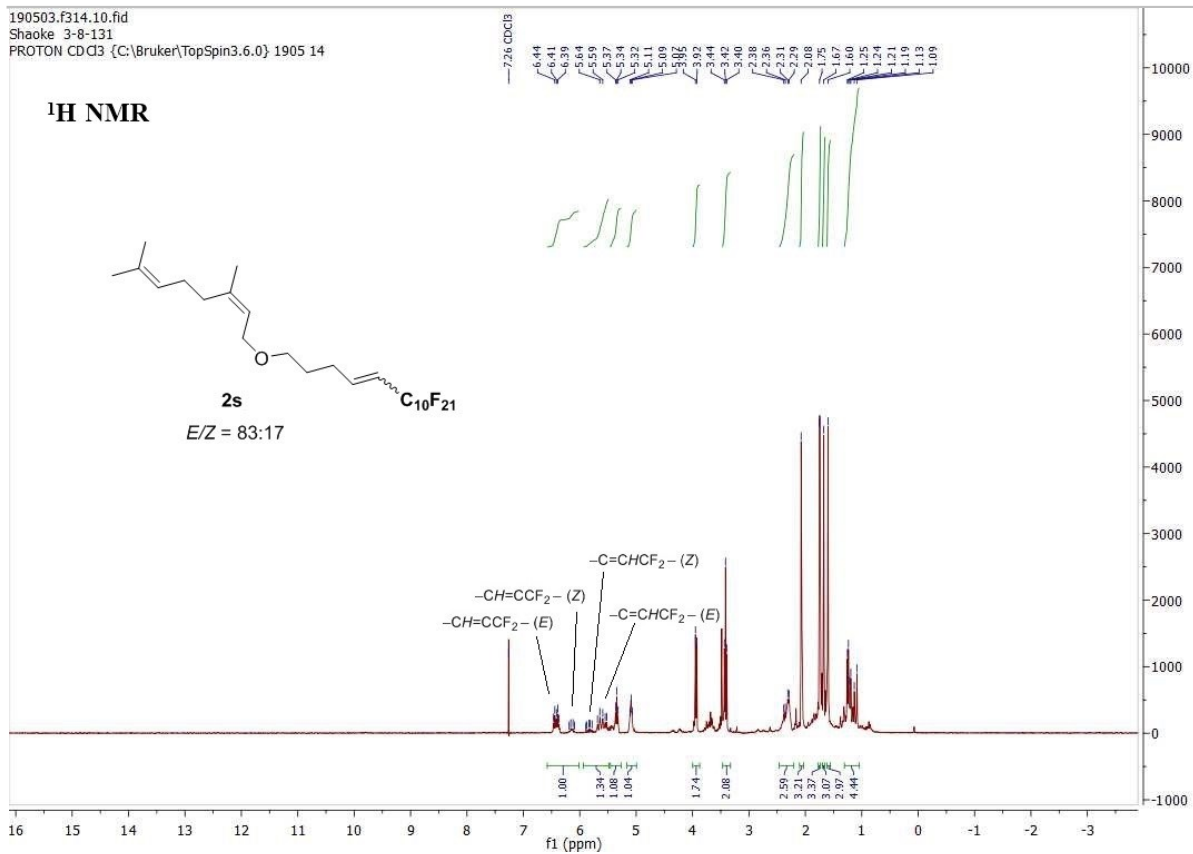

190503.F323.10.fid  
 Shaok 3-8-131  
<sup>19</sup>F-quant CDCl<sub>3</sub> {C:\Bruker\TopSpin3.6.0} 1905 23

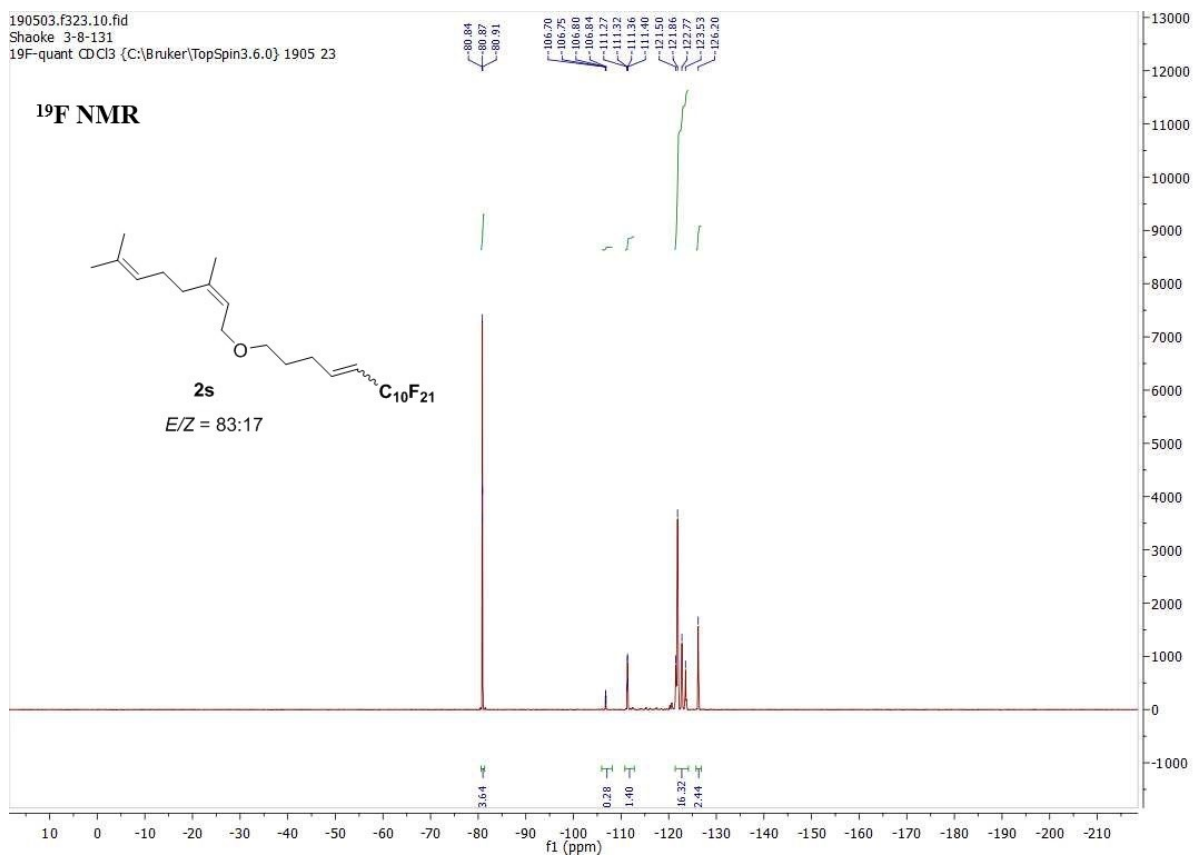

# SUPPORTING INFORMATION

## 8.3 Spectra of other perfluoroalkylated alkenes

191014.f309.10.fid  
Shaoke 3-8-180-1  
PROTON CDC13 {C:\Bruker\TopSpin3.6.0} 1910 9

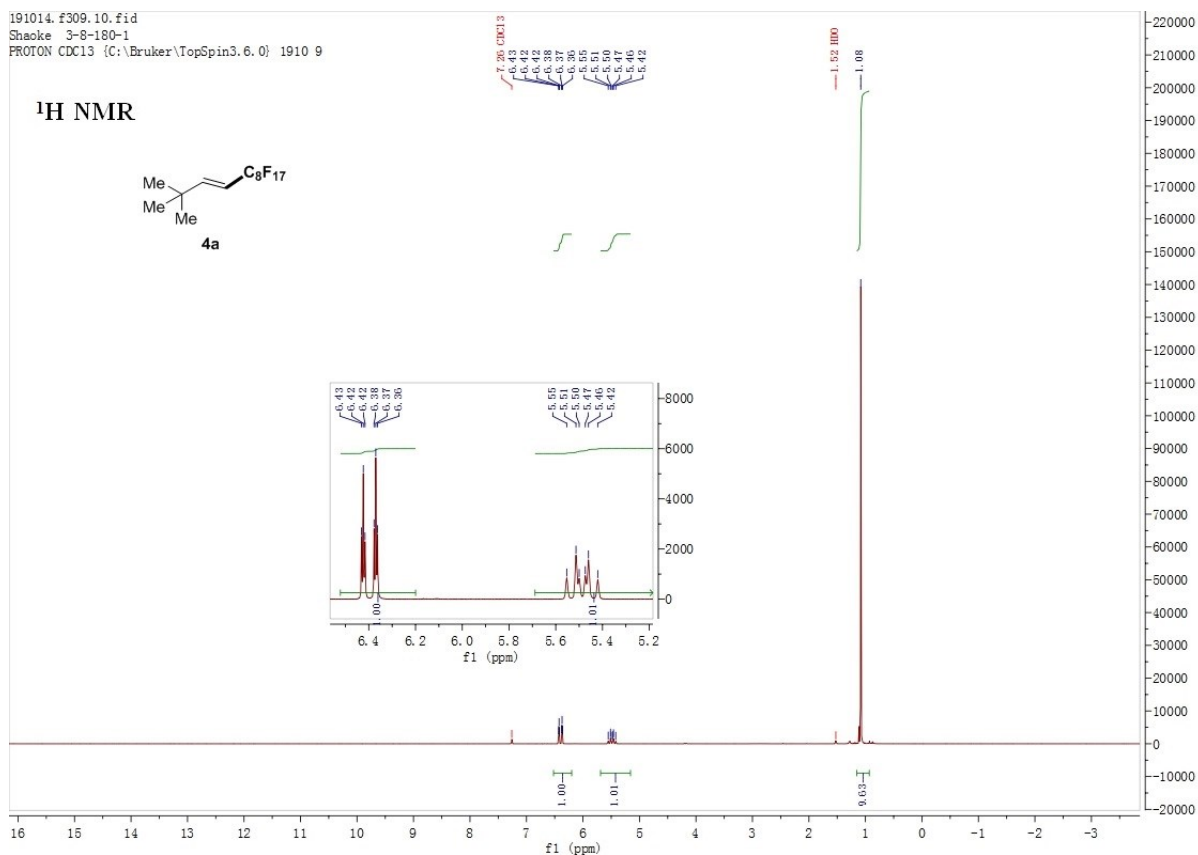

191014.f309.11.fid  
Shaoke 3-8-180-1  
C13CPD CDC13 {C:\Bruker\TopSpin3.6.0} 1910 9

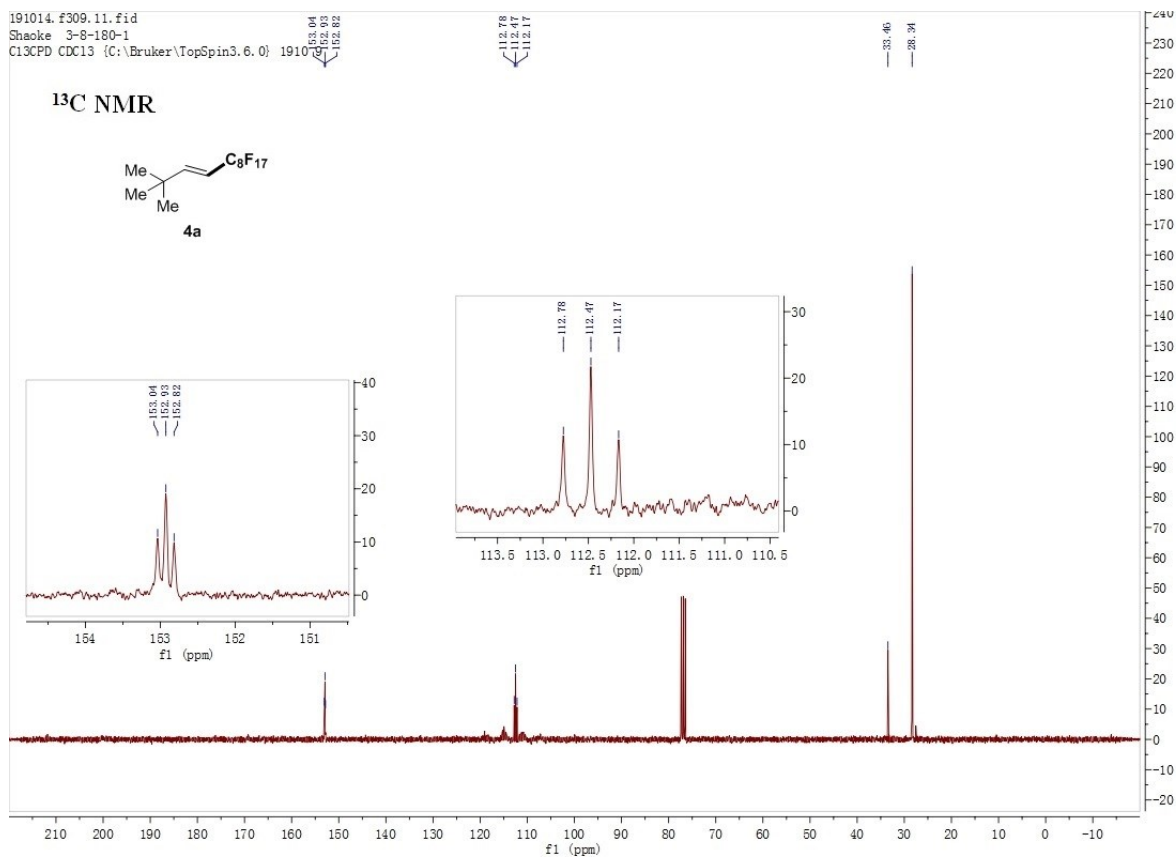

# SUPPORTING INFORMATION

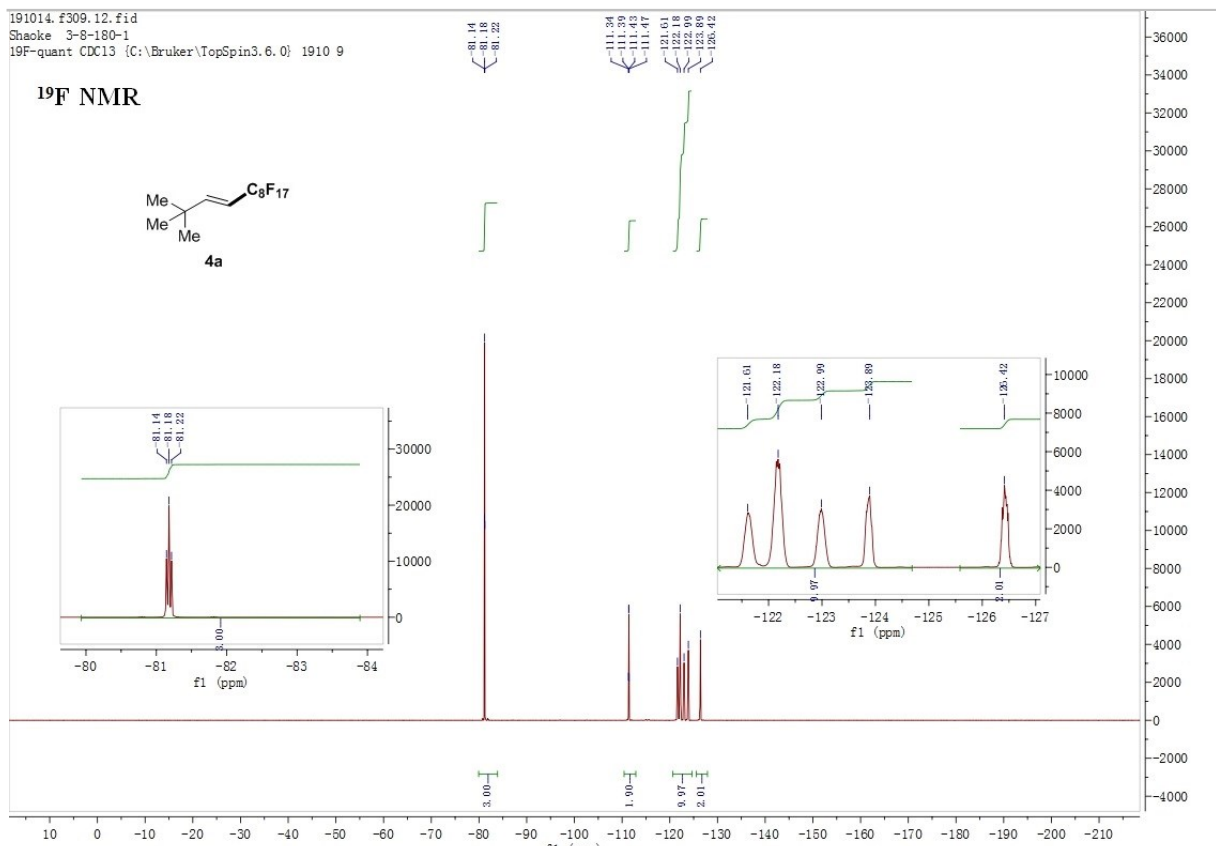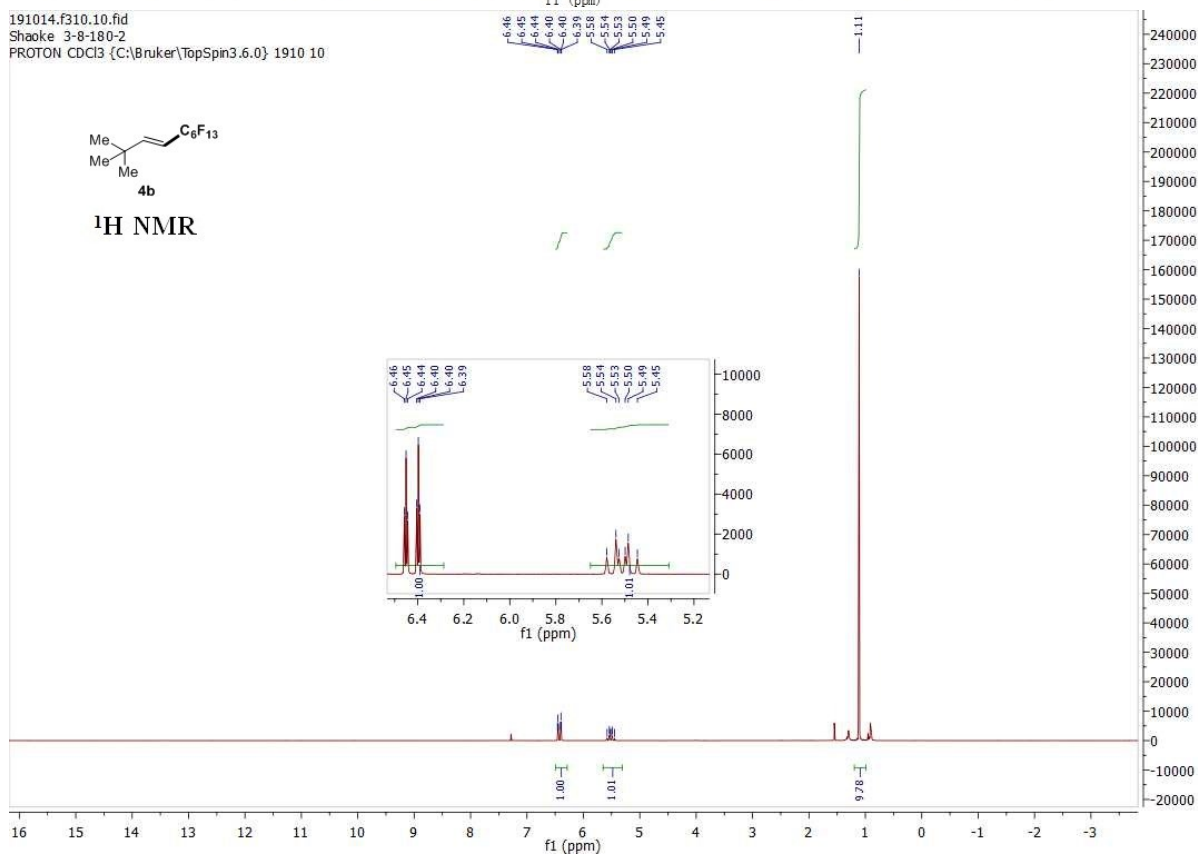

# SUPPORTING INFORMATION

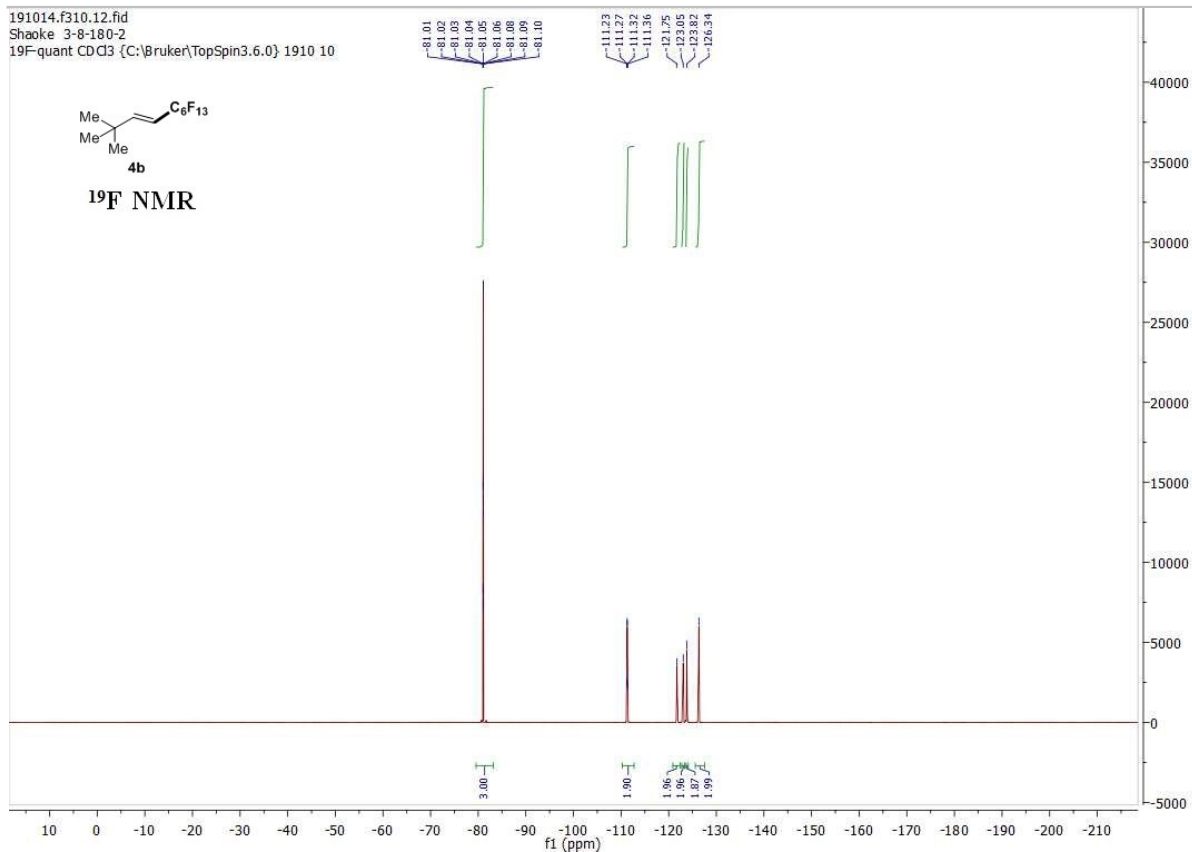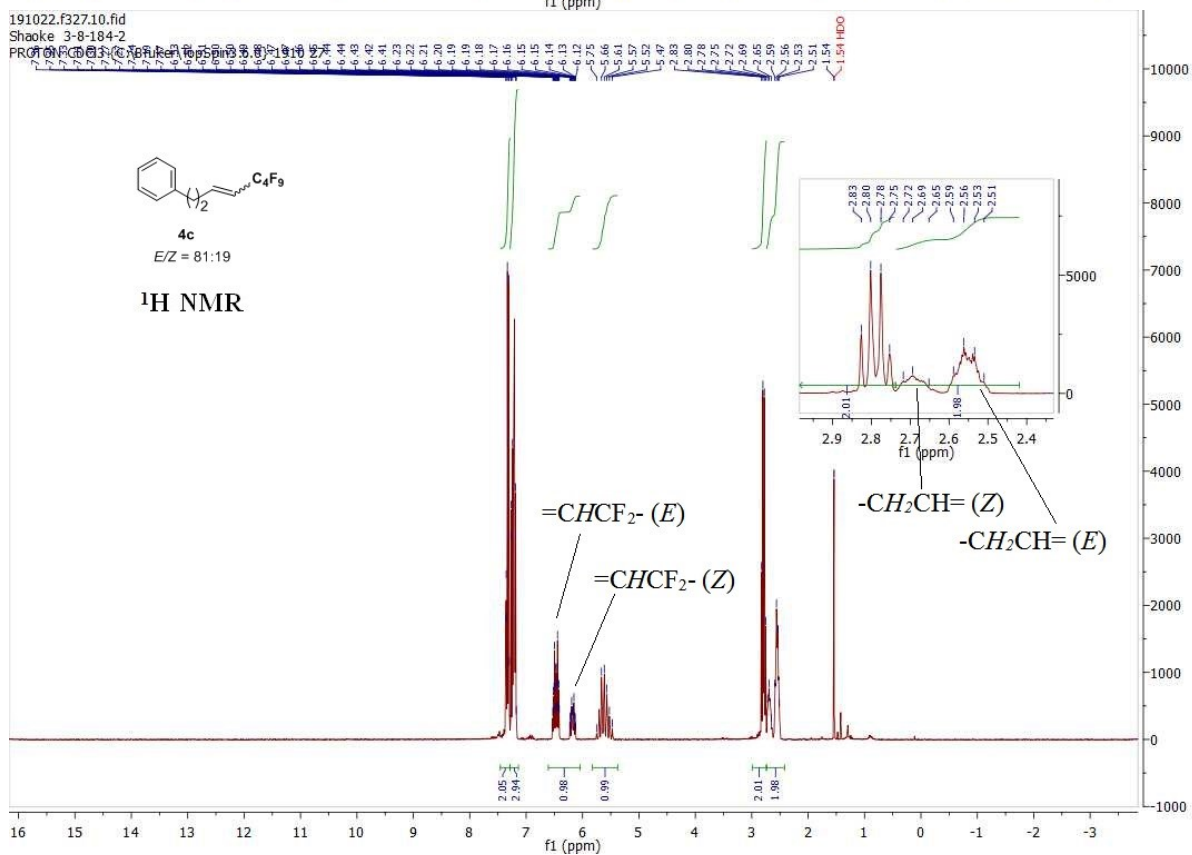



# SUPPORTING INFORMATION

191029.f306.11.fid  
 Shaoke 3-8-184-4  
 19F-quant CDCl3 {C:\Bruker\TopSpin3.6.0} 1910 6

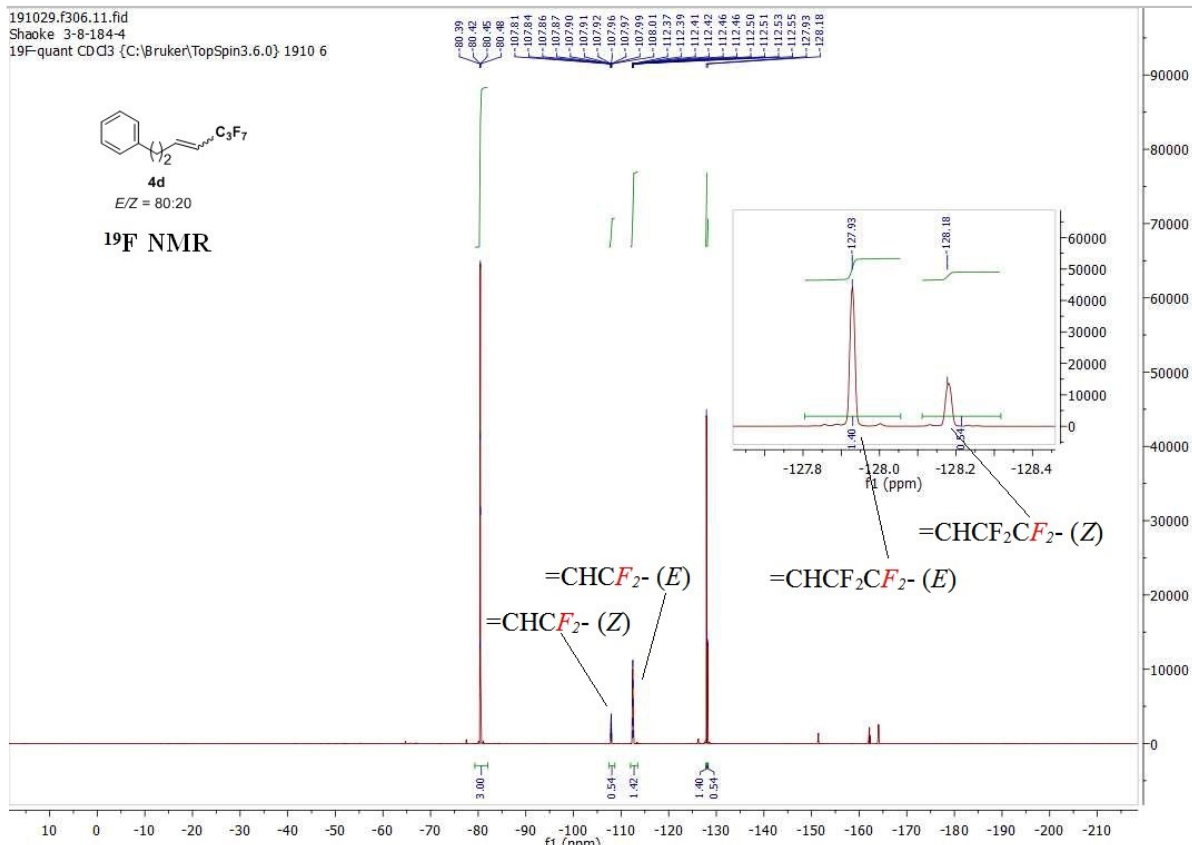

191021.f304.10.fid  
 Shaoke 3-8-184-1  
 PROTON CDCl3 {C:\Bruker\TopSpin3.6.0} 1910 4

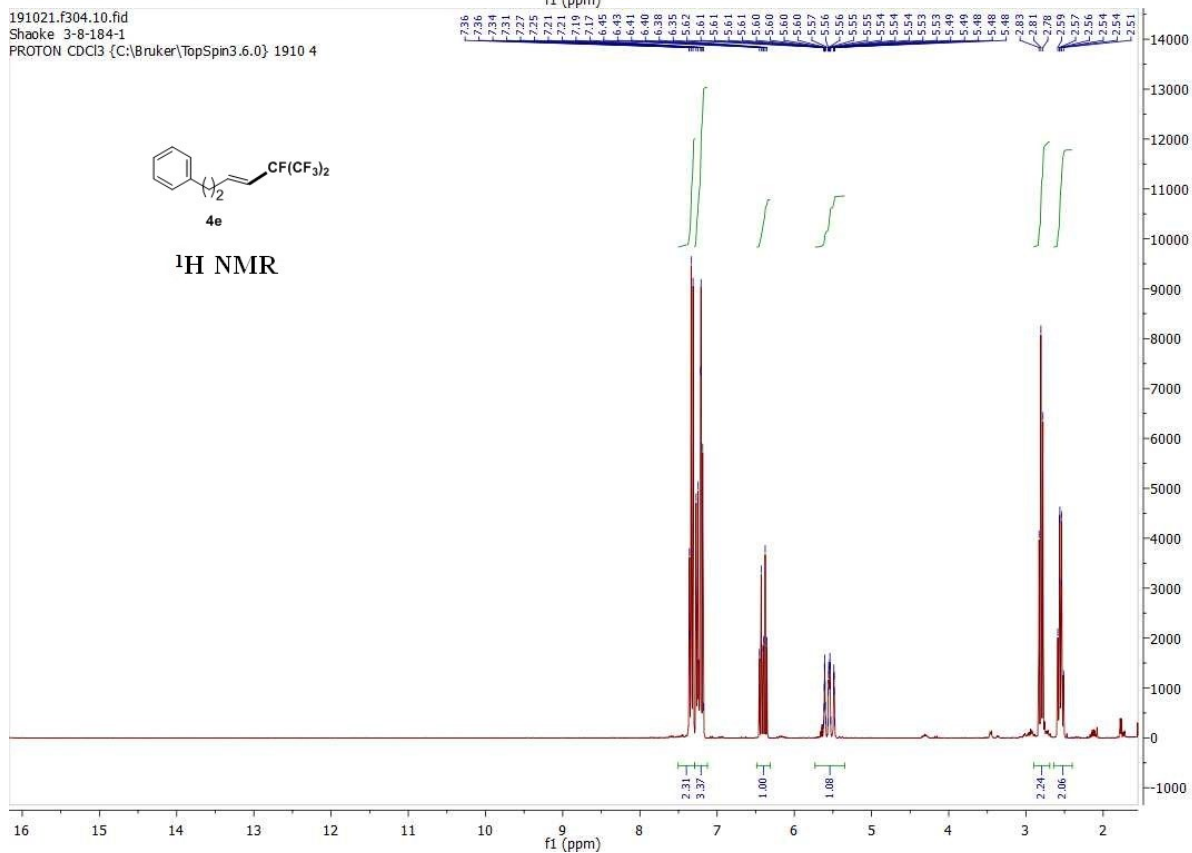



# SUPPORTING INFORMATION

191021.f304.11.fid  
 Shaoke 3-8-184-1  
 C13CPD CDCl3 (C:\Bruker\TopSpin3.6.0) 1910 4

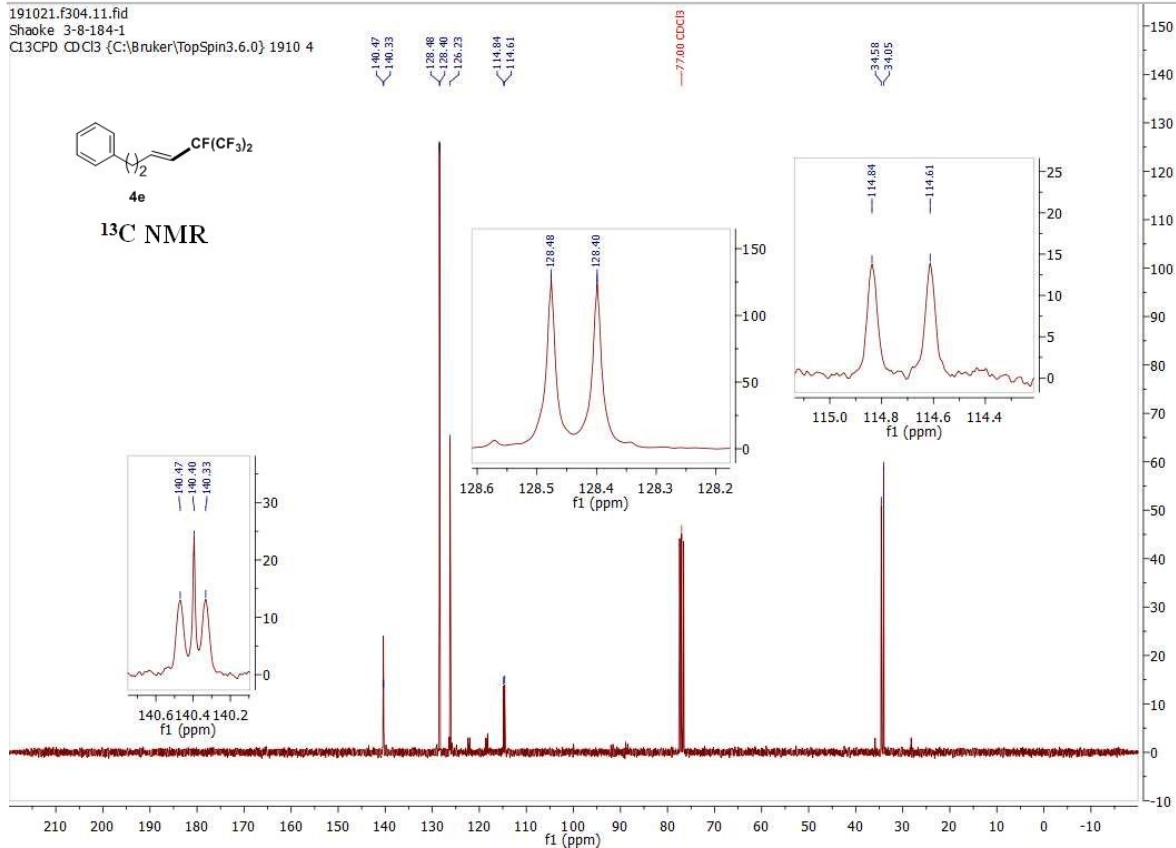

191022.f318.10.fid  
 Shaoke 3-8-184-1  
 C13DEPT135 CDCl3 (C:\Bruker\TopSpin3.6.0) 1910 18

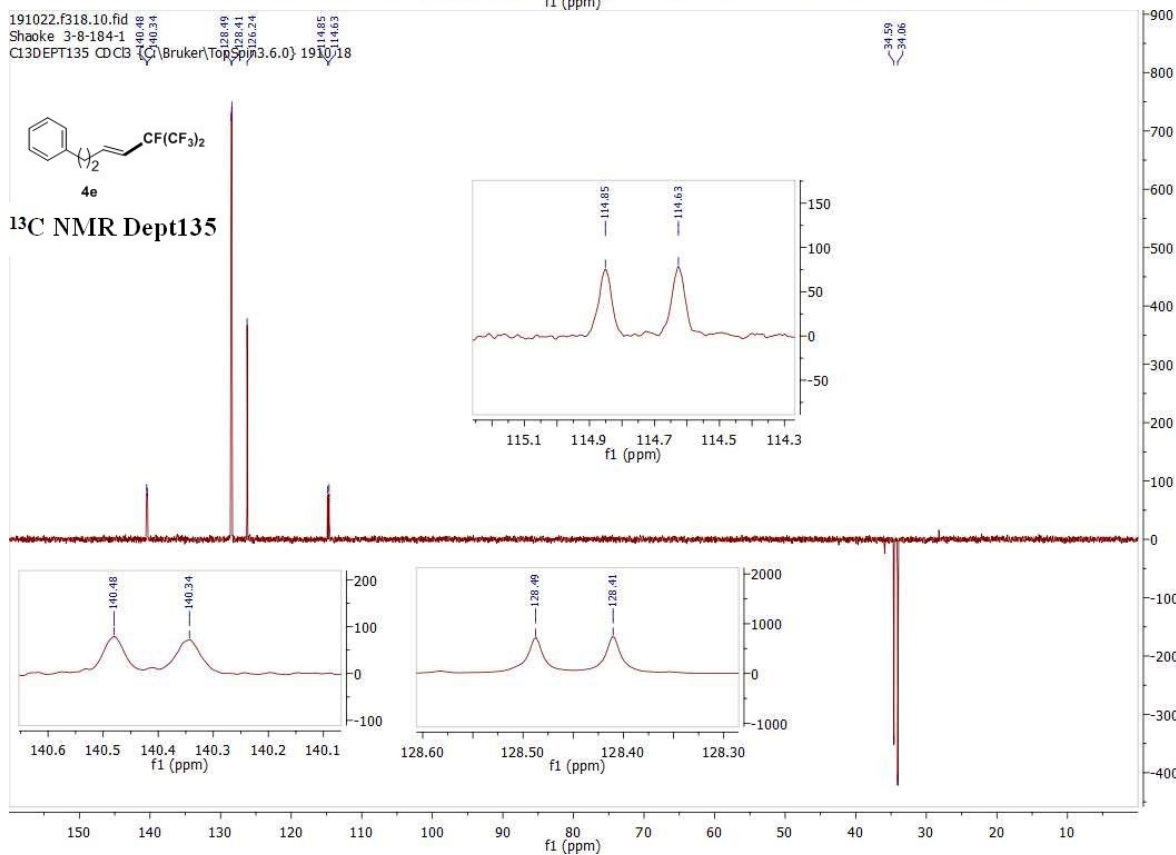

# SUPPORTING INFORMATION

191018.f304.12.fid  
 Shaoke 3-8-184-1  
 19F-quant CDCl3 {C:\Bruker\TopSpin3.6.0} 1910 4

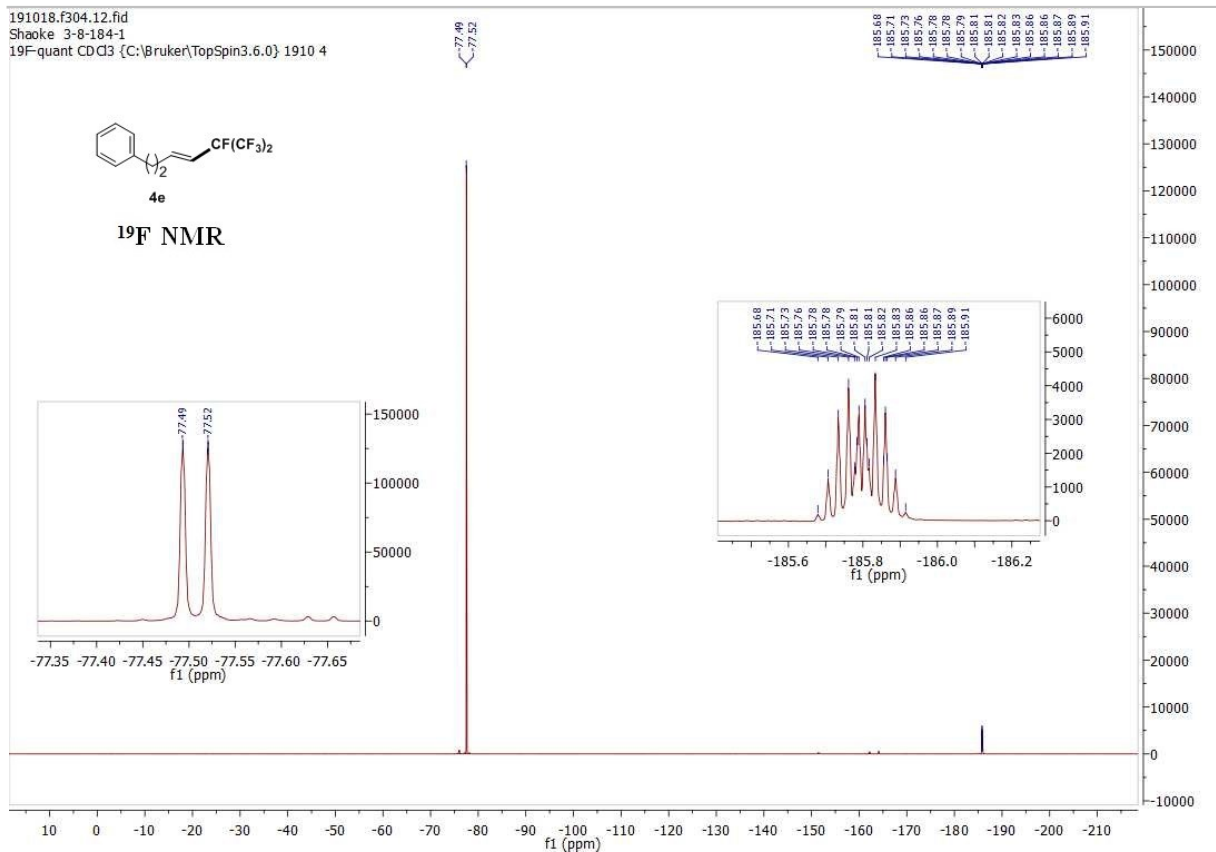

181119.320.10.fid  
 Shaoke 3-8-32-4  
 Au1H CDCl3 {C:\Bruker\TopSpin3.5pl6} 1811 20

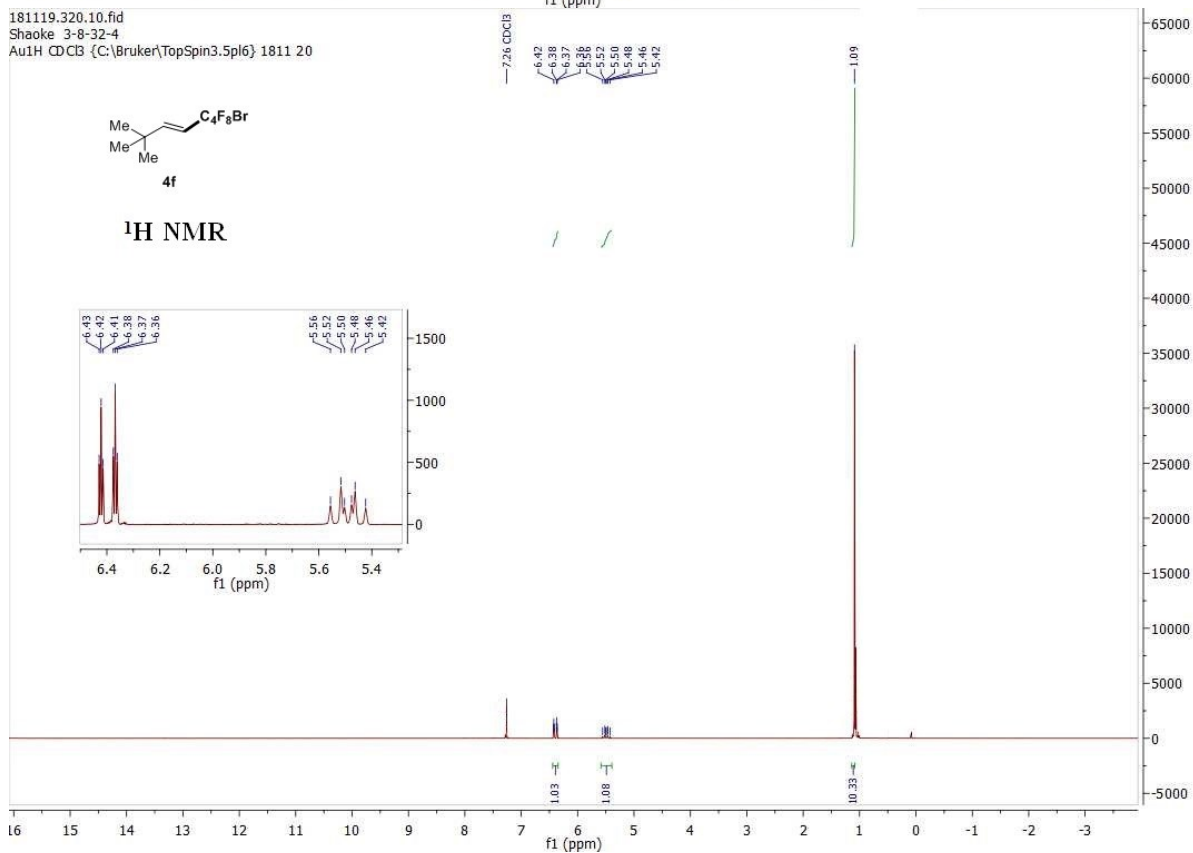



# SUPPORTING INFORMATION

181119.320.12.fid  
Shaoke 3-8-32-4  
Au19F CDCl3 {C:\Bruker\TopSpin3.5pl6} 1811 20

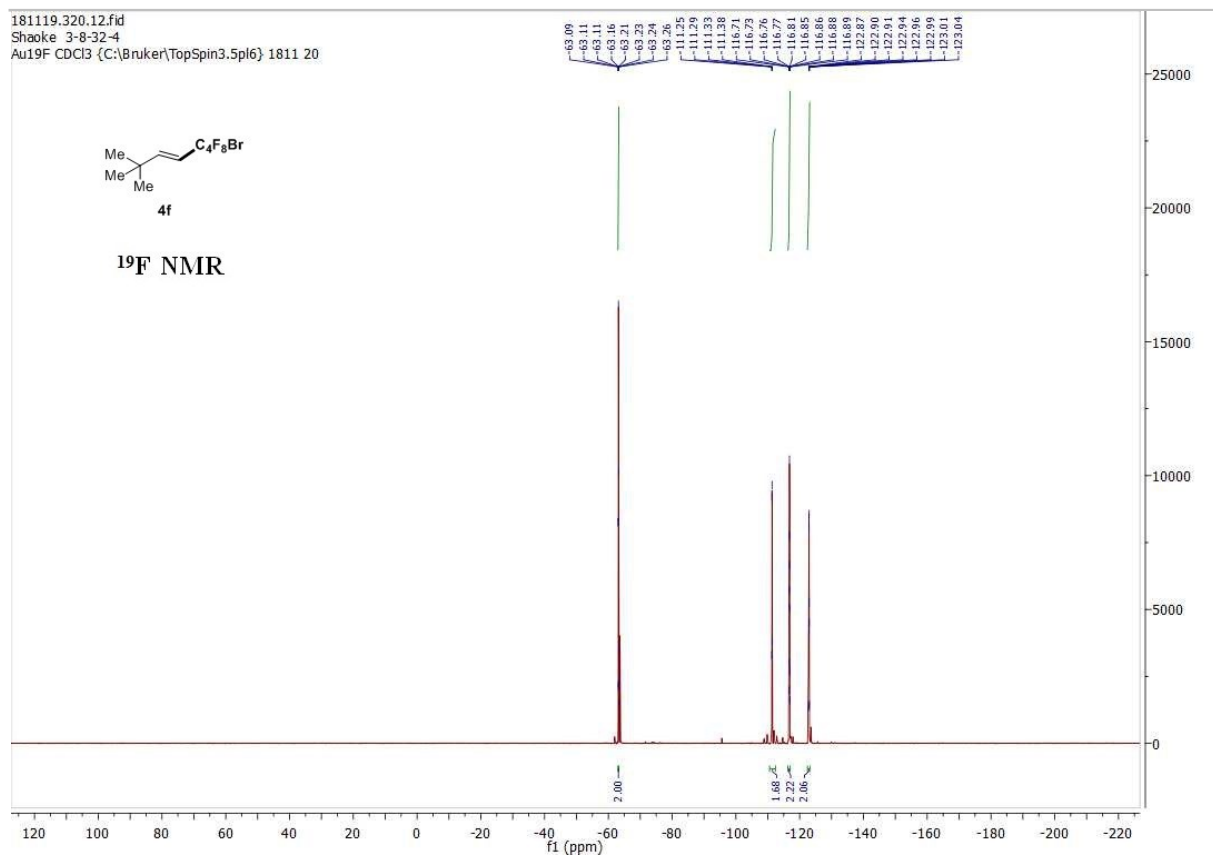



# SUPPORTING INFORMATION

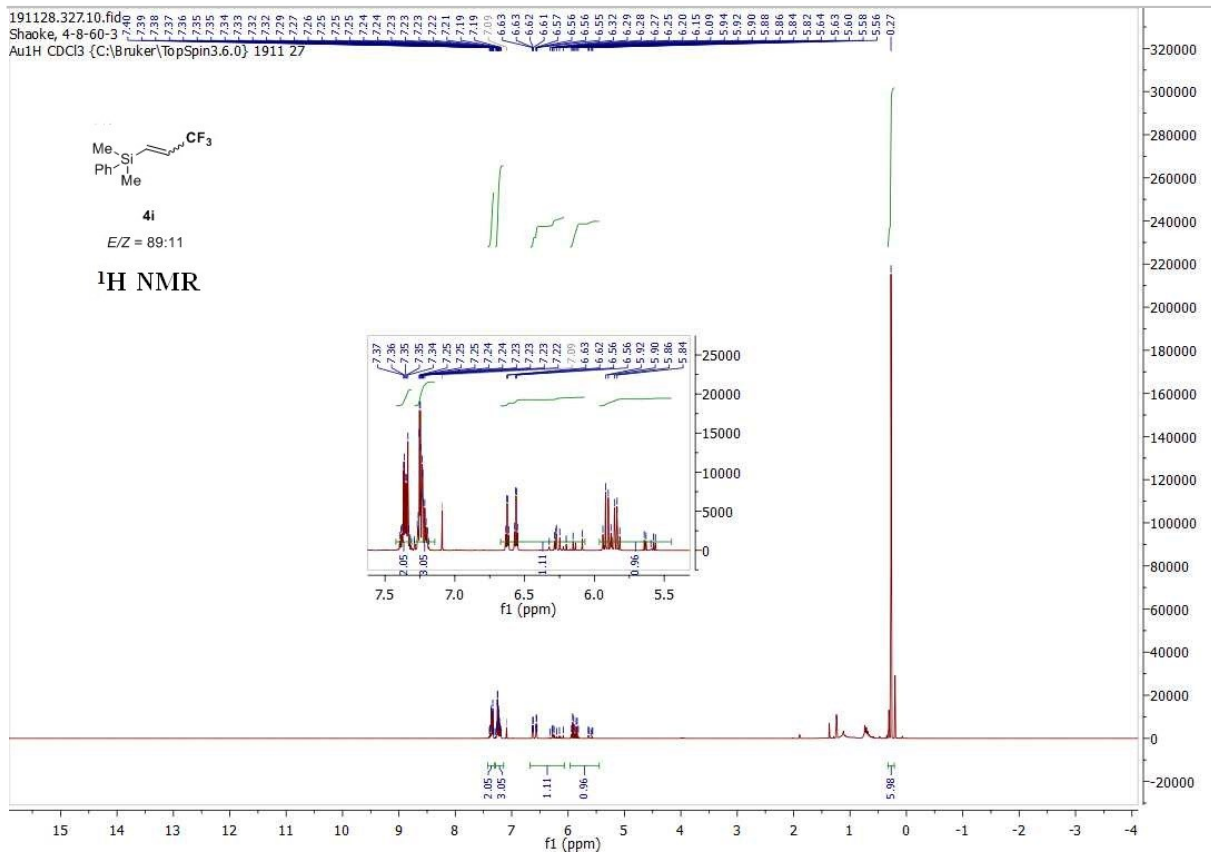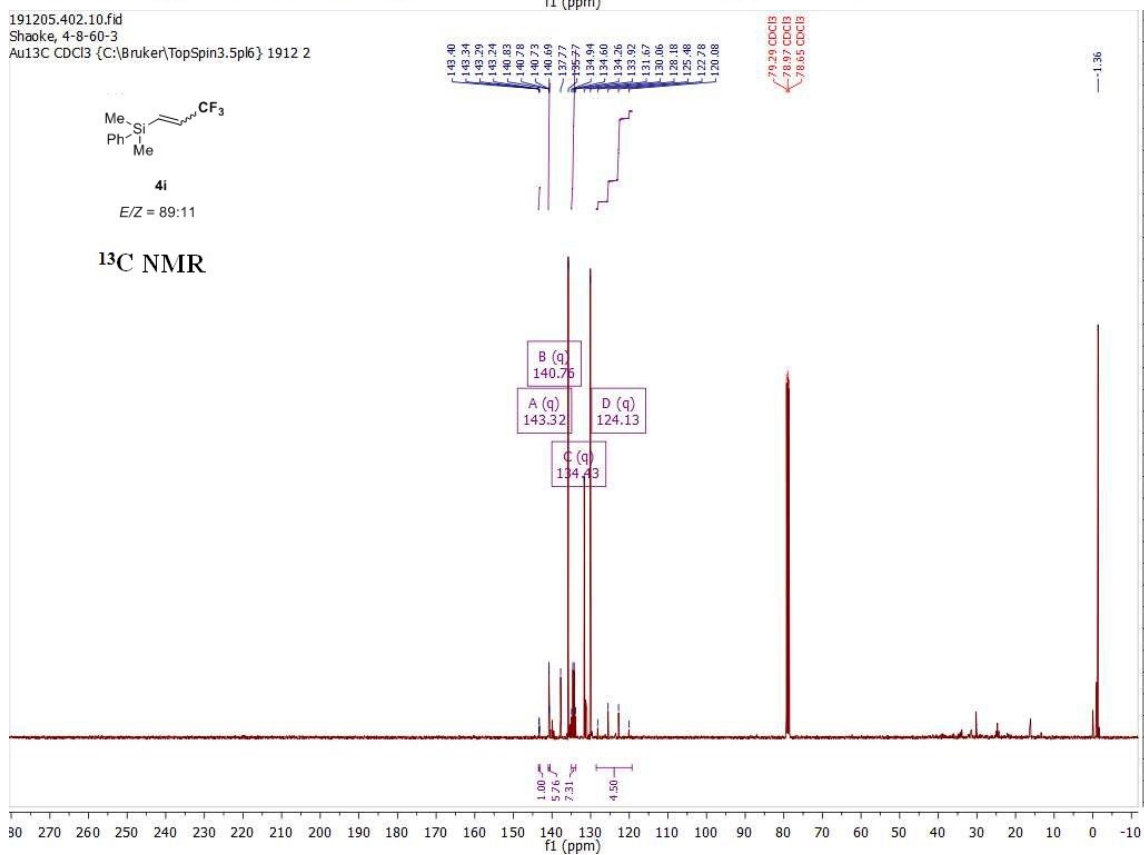

# SUPPORTING INFORMATION

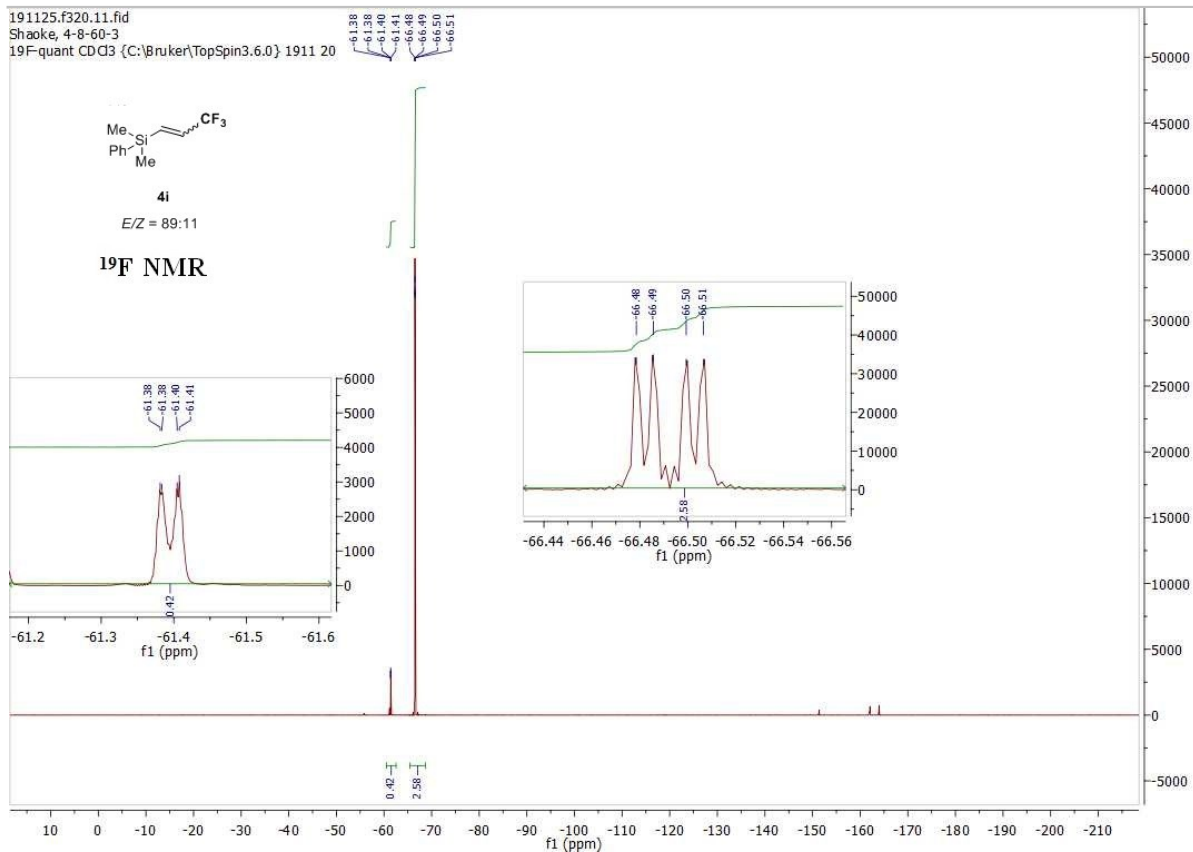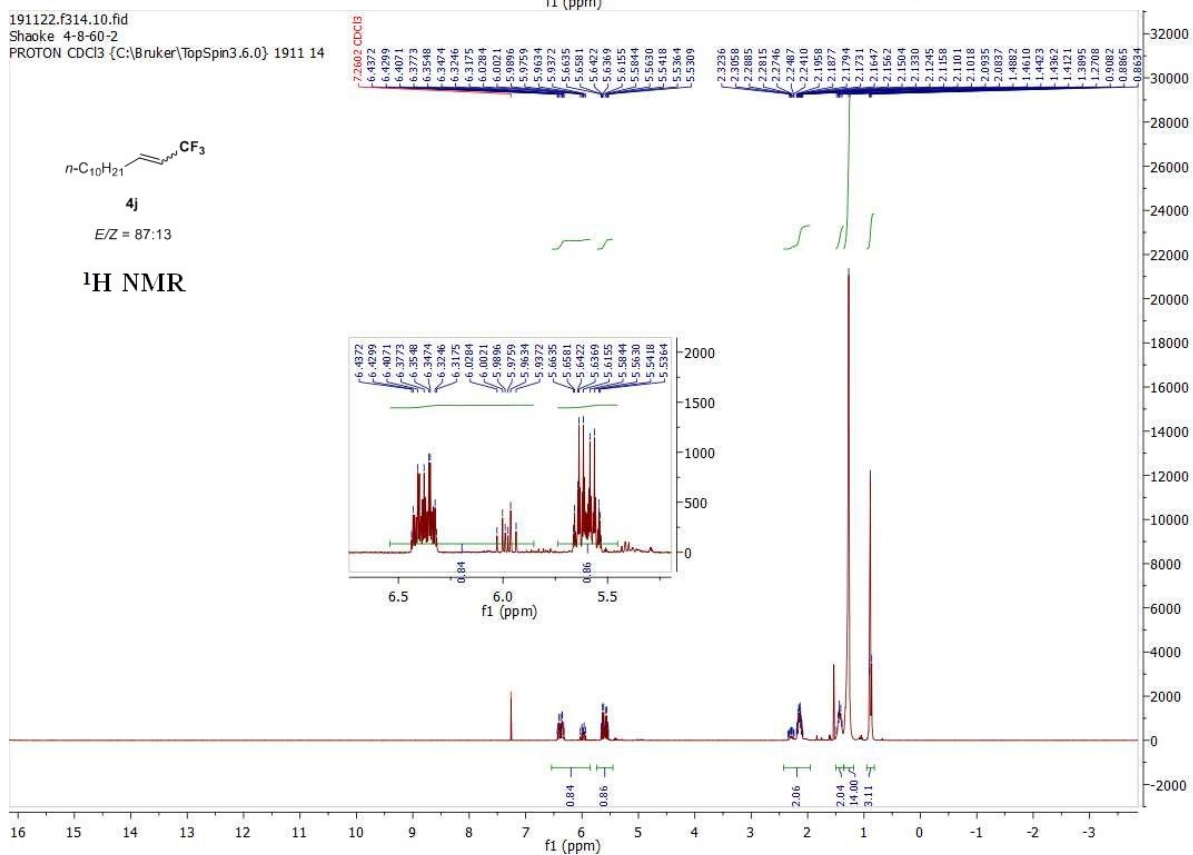

# SUPPORTING INFORMATION

191204.413.10.fid  
 Shaoke 4-8-60-2  
 Au13C CDCl3 {C:\Bruker\TopSpin3.5pl6} 1912 13

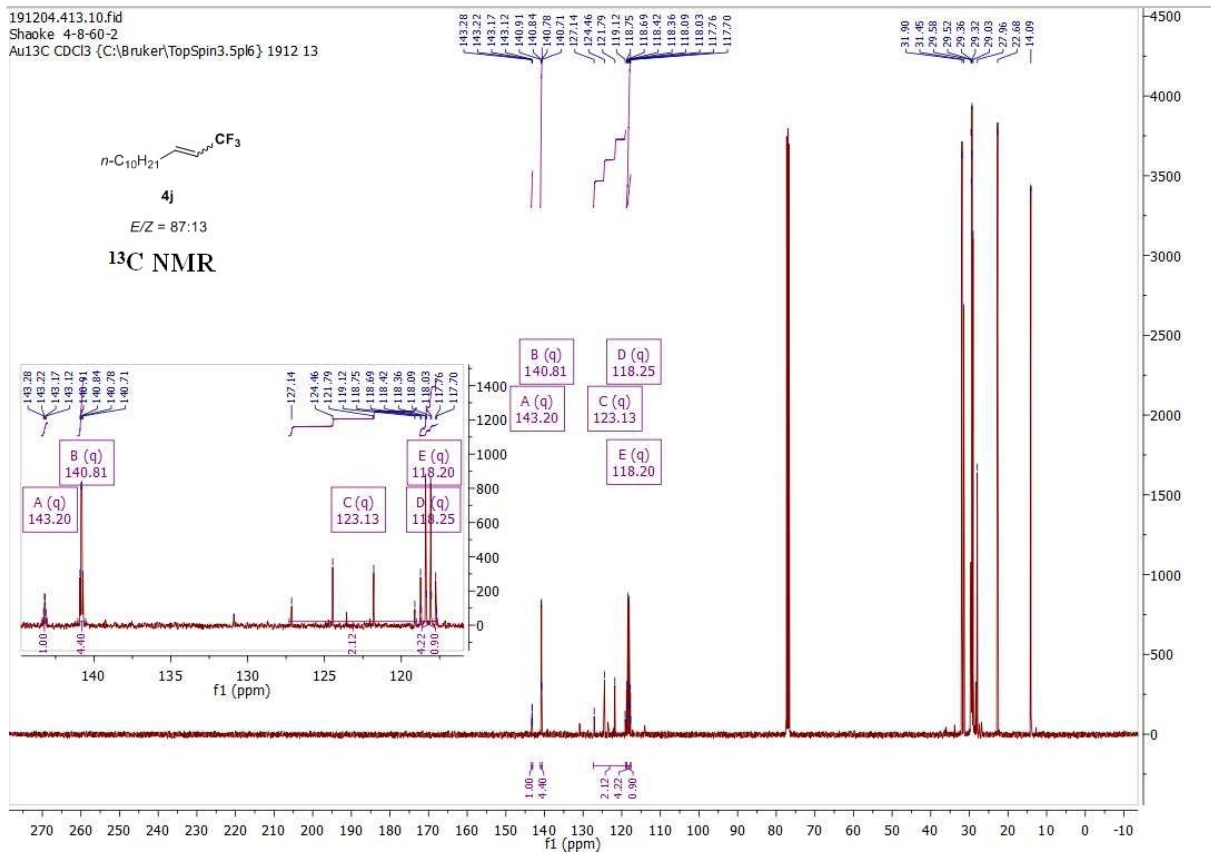

191122.f314.11.fid  
 Shaoke 4-8-60-2  
 19F-quant CDCl3 {C:\Bruker\TopSpin3.6.0} 1911

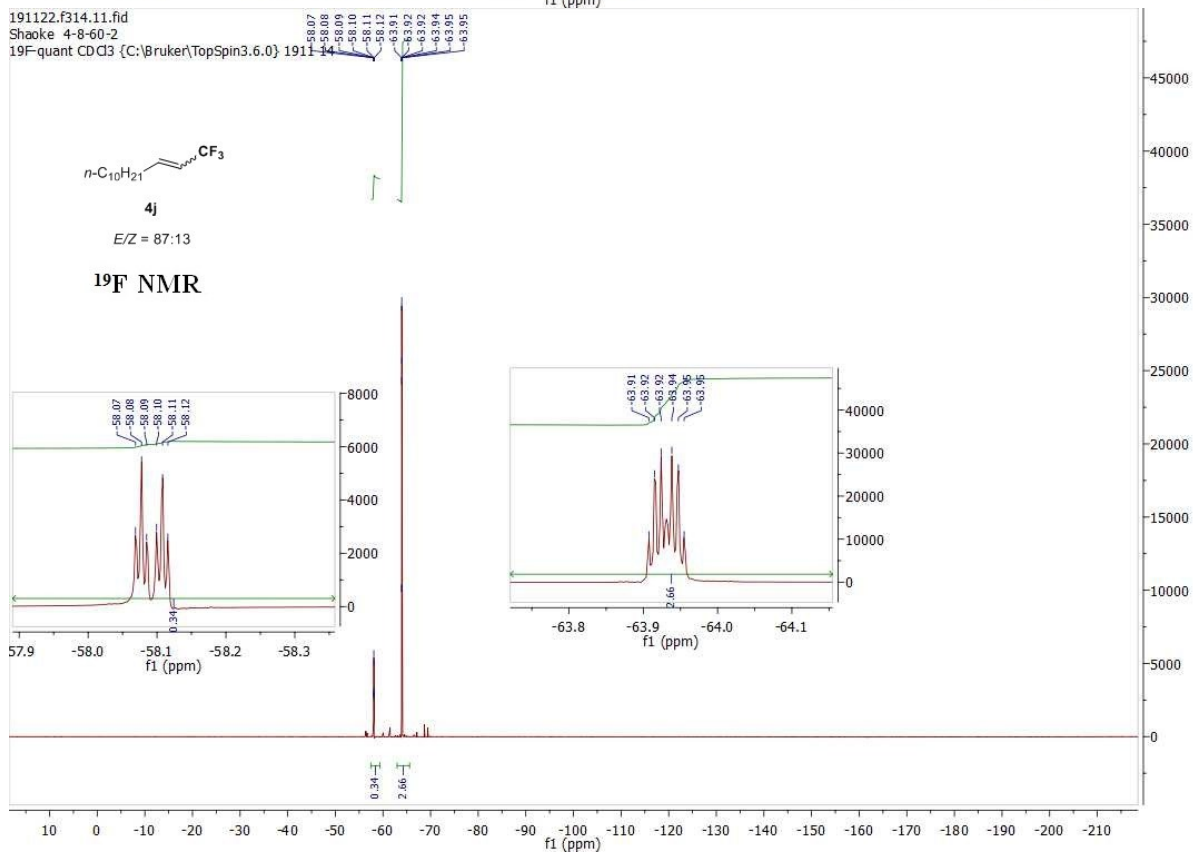

# SUPPORTING INFORMATION

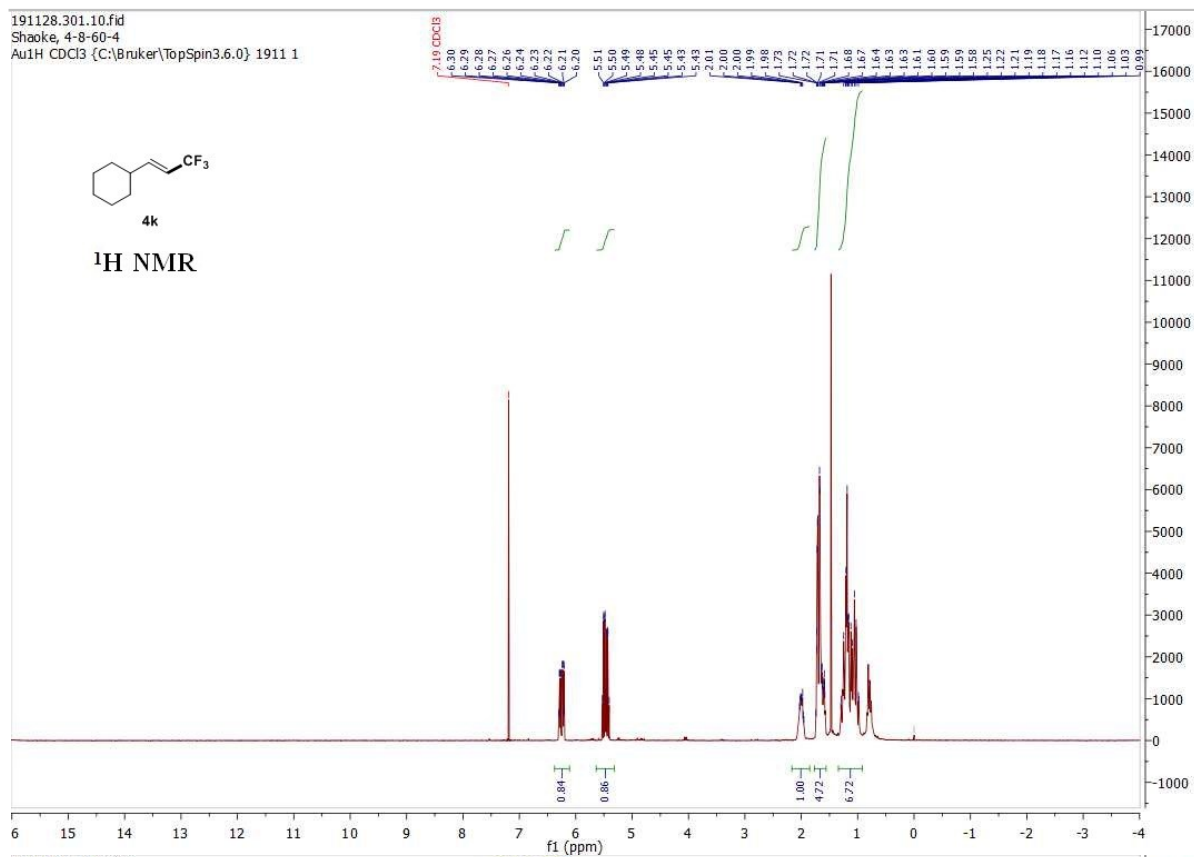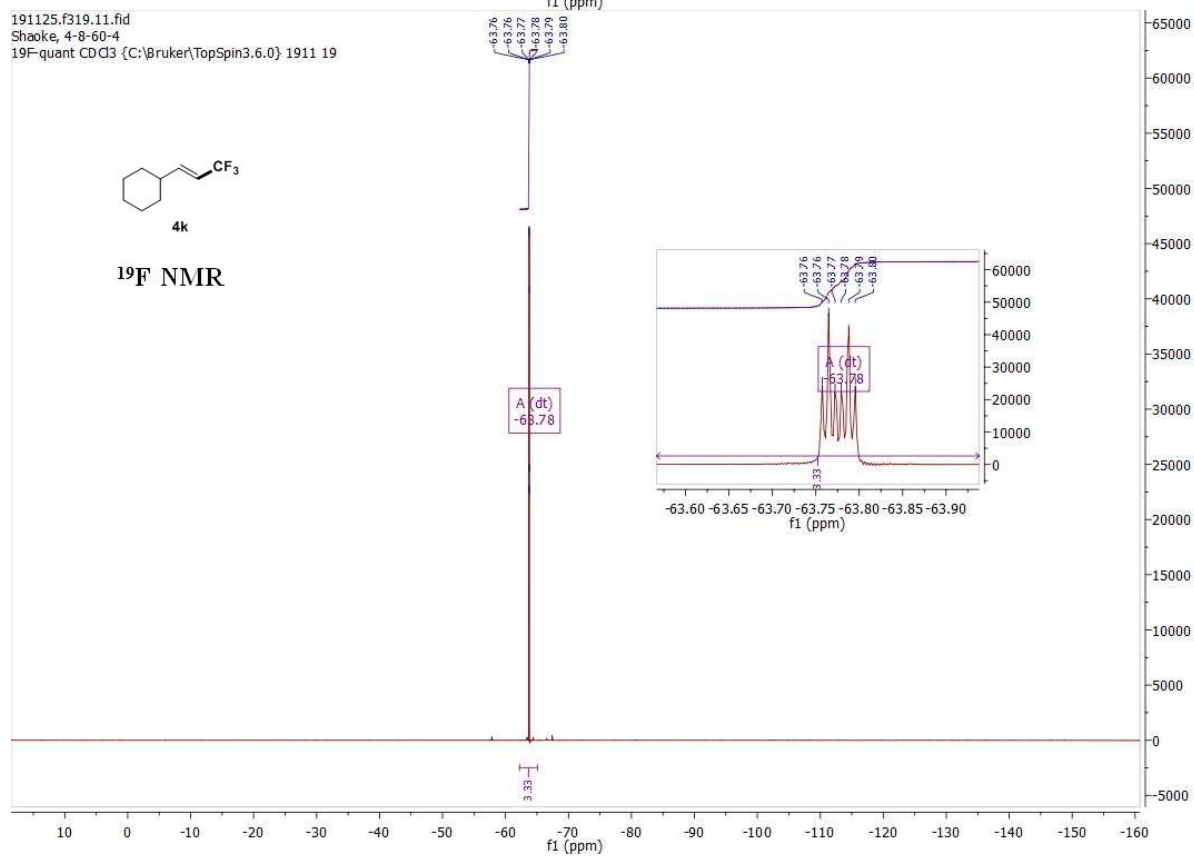

# SUPPORTING INFORMATION

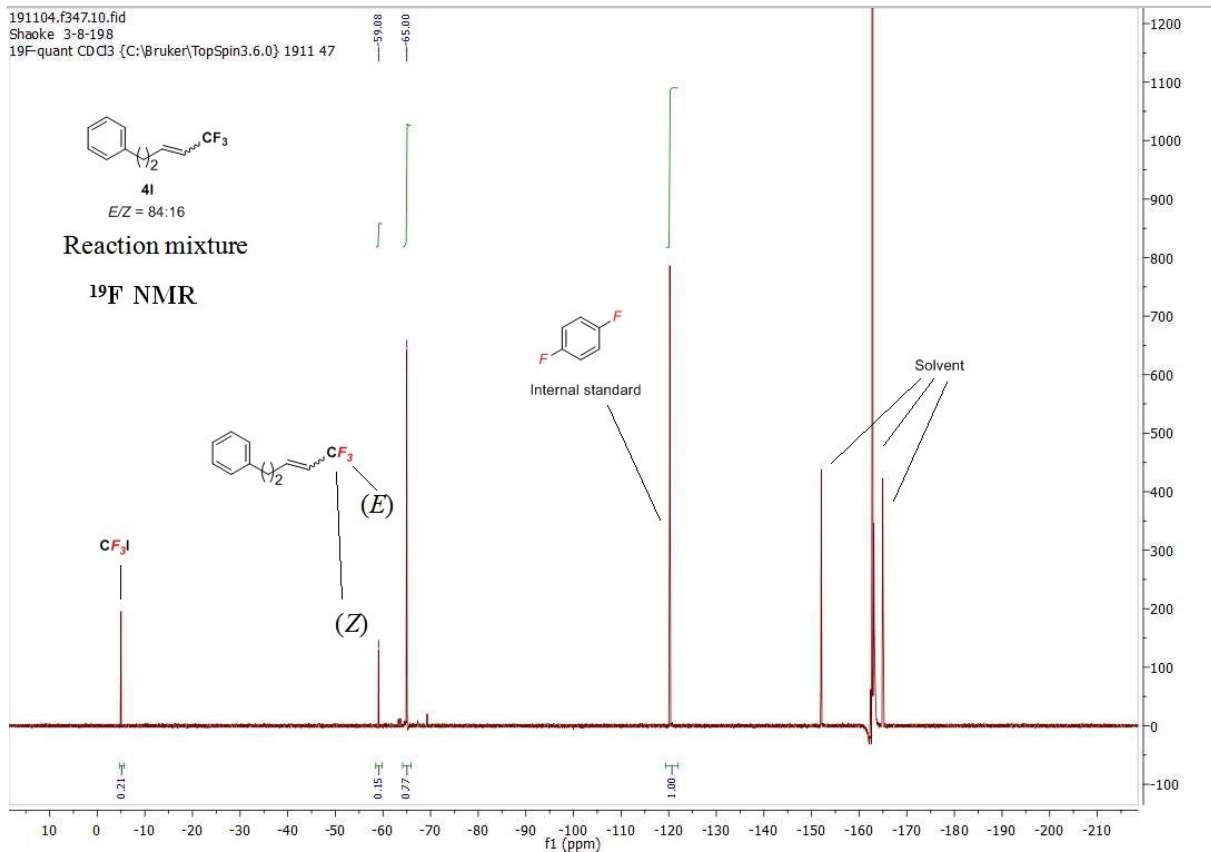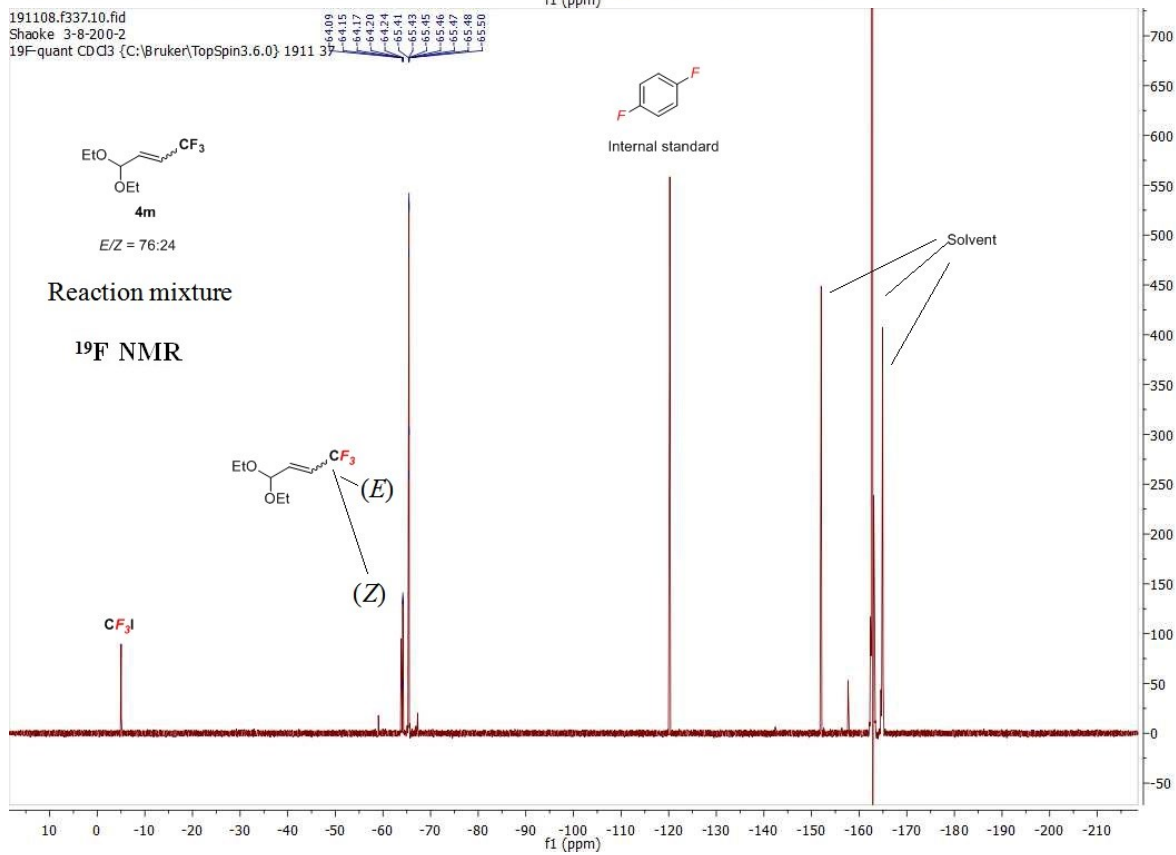



# SUPPORTING INFORMATION

191205.303.10.fid  
 Shaoke, 4-8-58-4-2  
 Au1H CDCl3 {C:\Bruker\TopSpin3.6.0} 1912 3

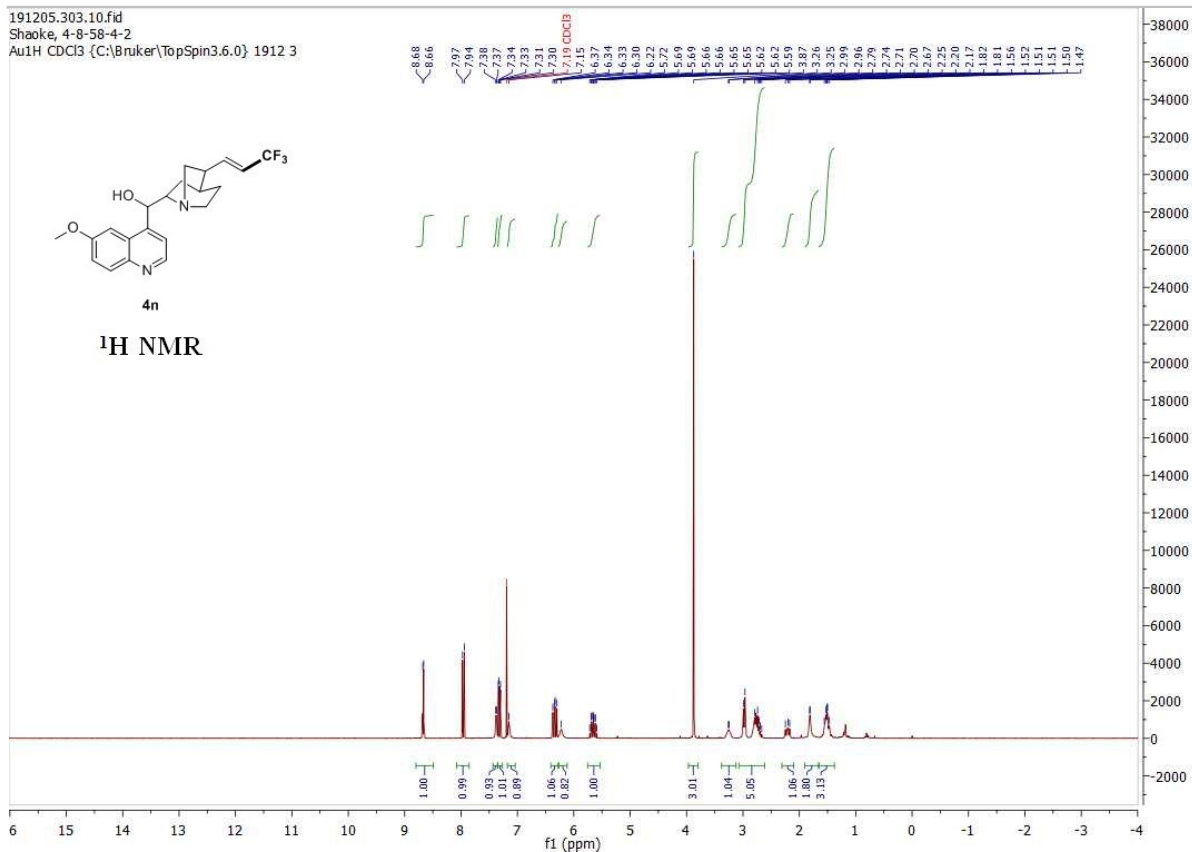

191212.405.10.fid  
 Shaoke, 4-8-58-4-2  
 Au13C CDCl3 {C:\Bruker\TopSpin3.5pl6} 1912 5

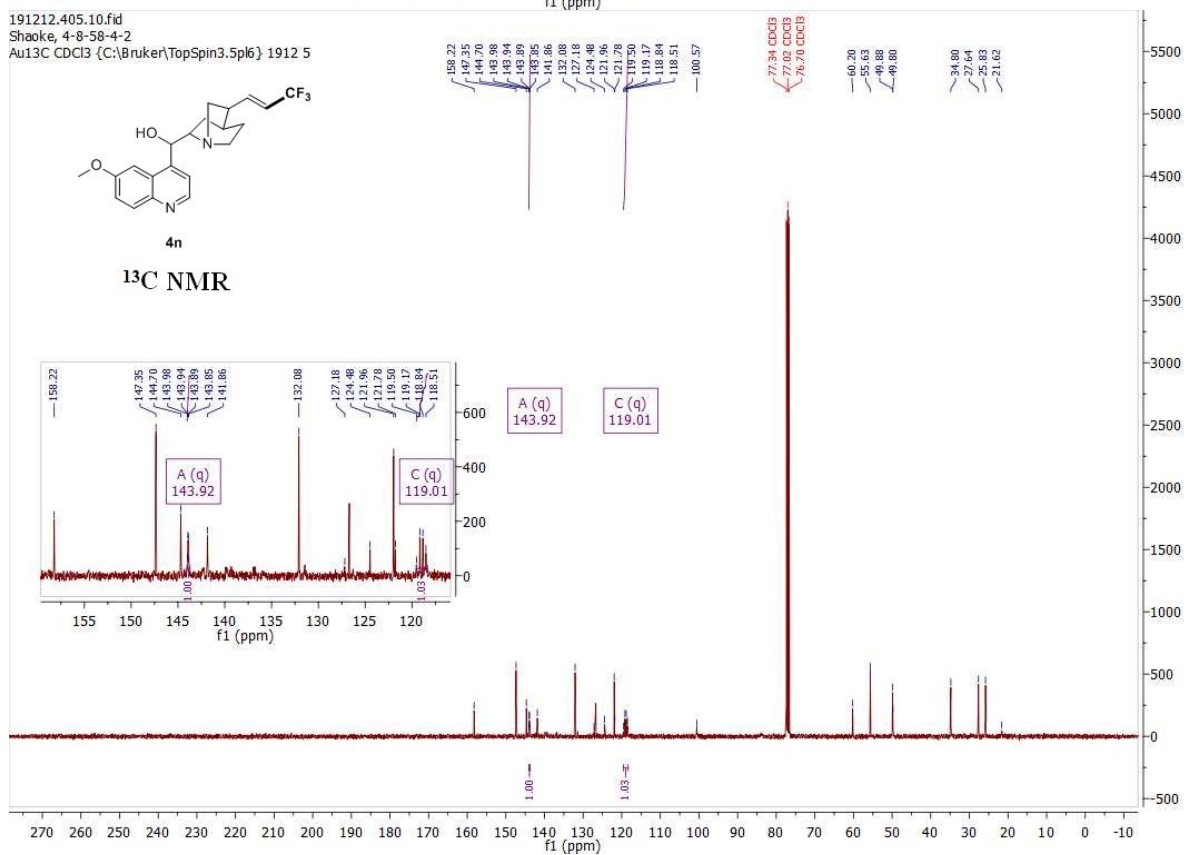



# SUPPORTING INFORMATION

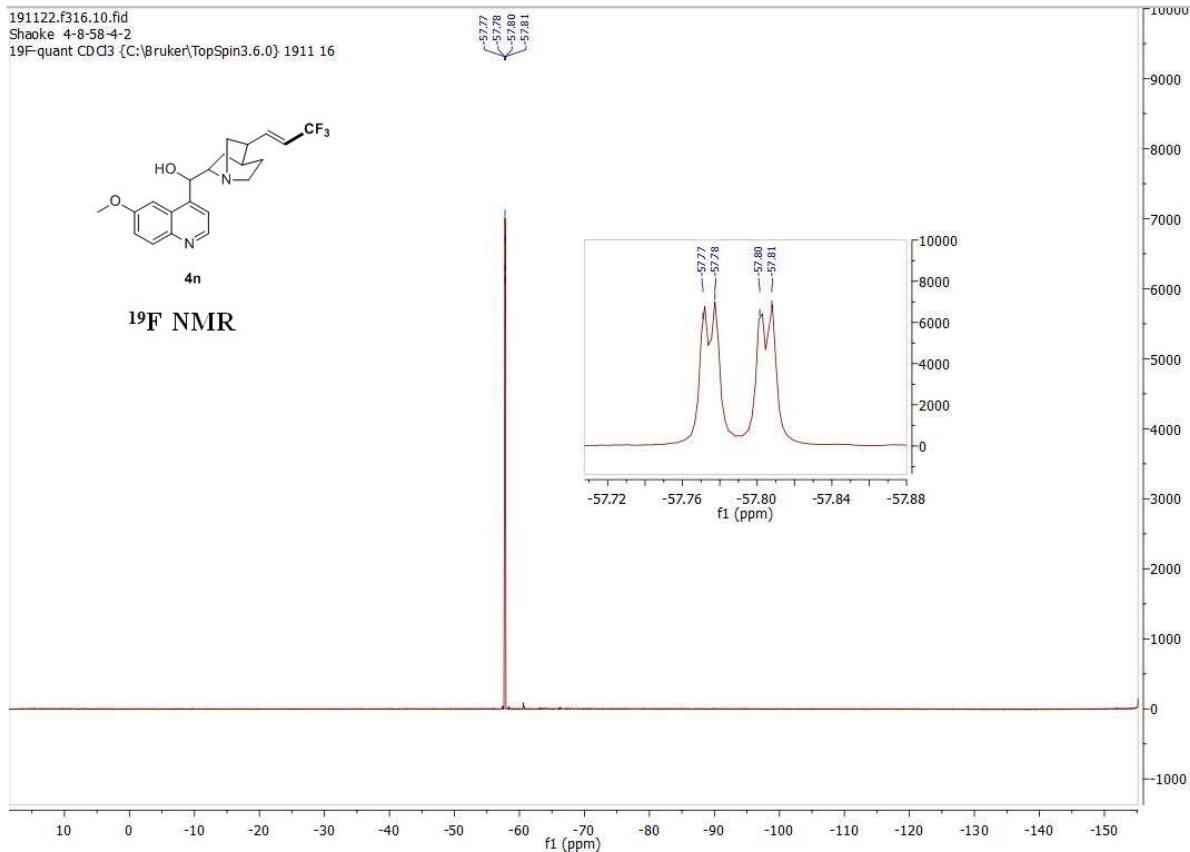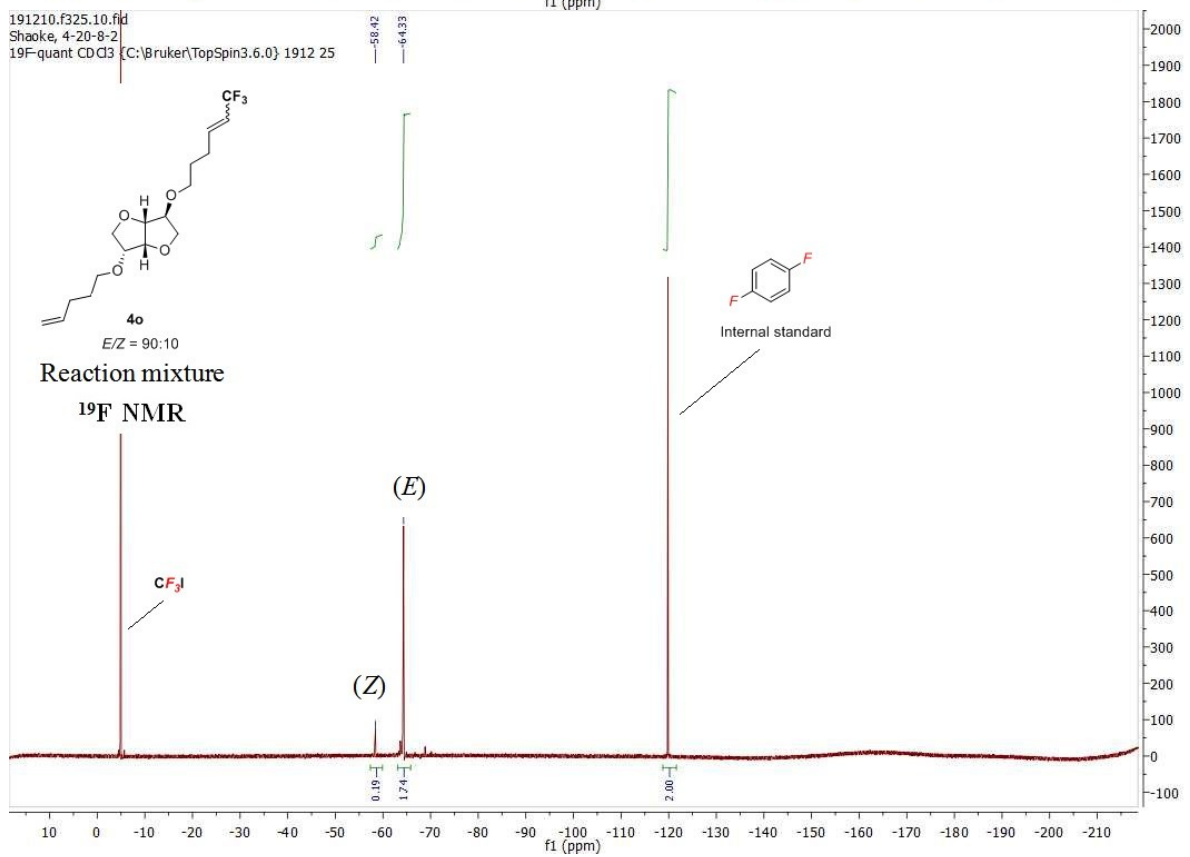

# SUPPORTING INFORMATION

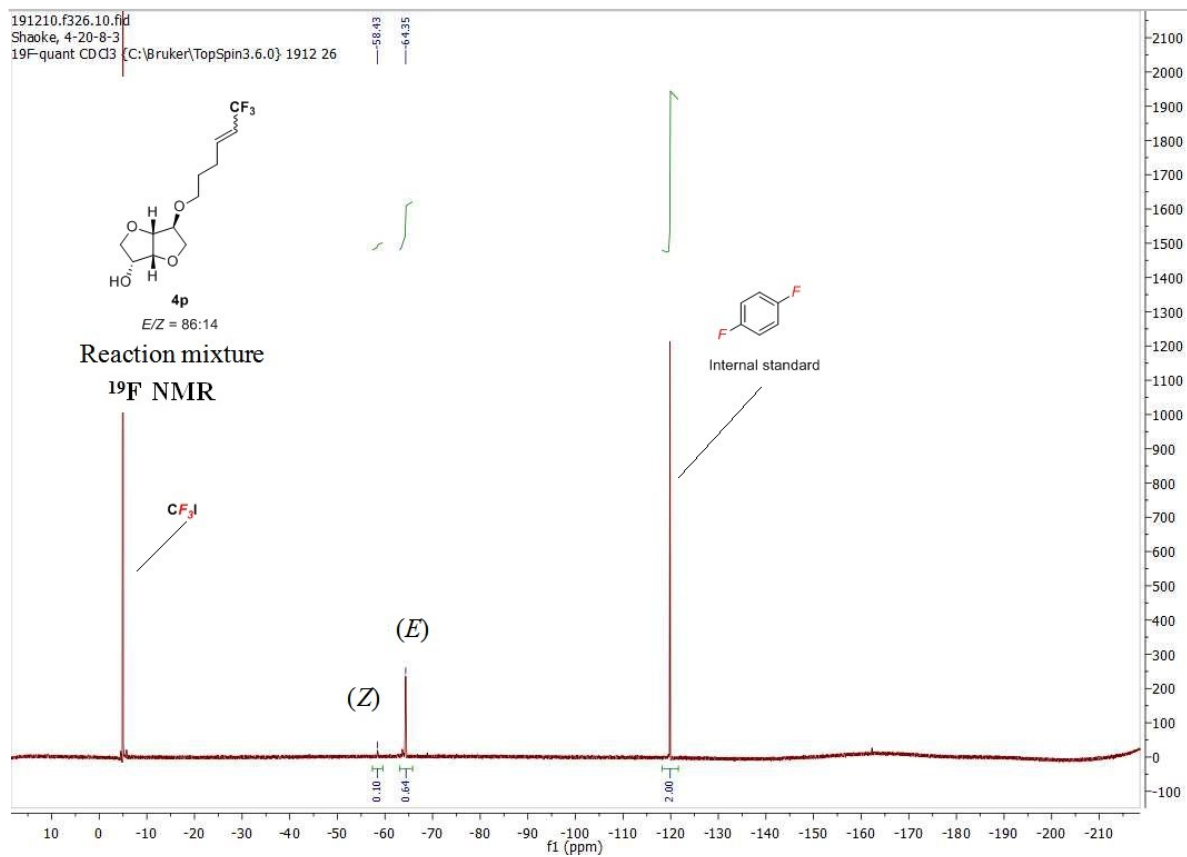



# SUPPORTING INFORMATION

190919.f306.10.fid  
 Shaake 3-8-169-2-2  
 PROTON CDCl<sub>3</sub> {C:\Bruker\TopSpin3.6.0} 1909 6

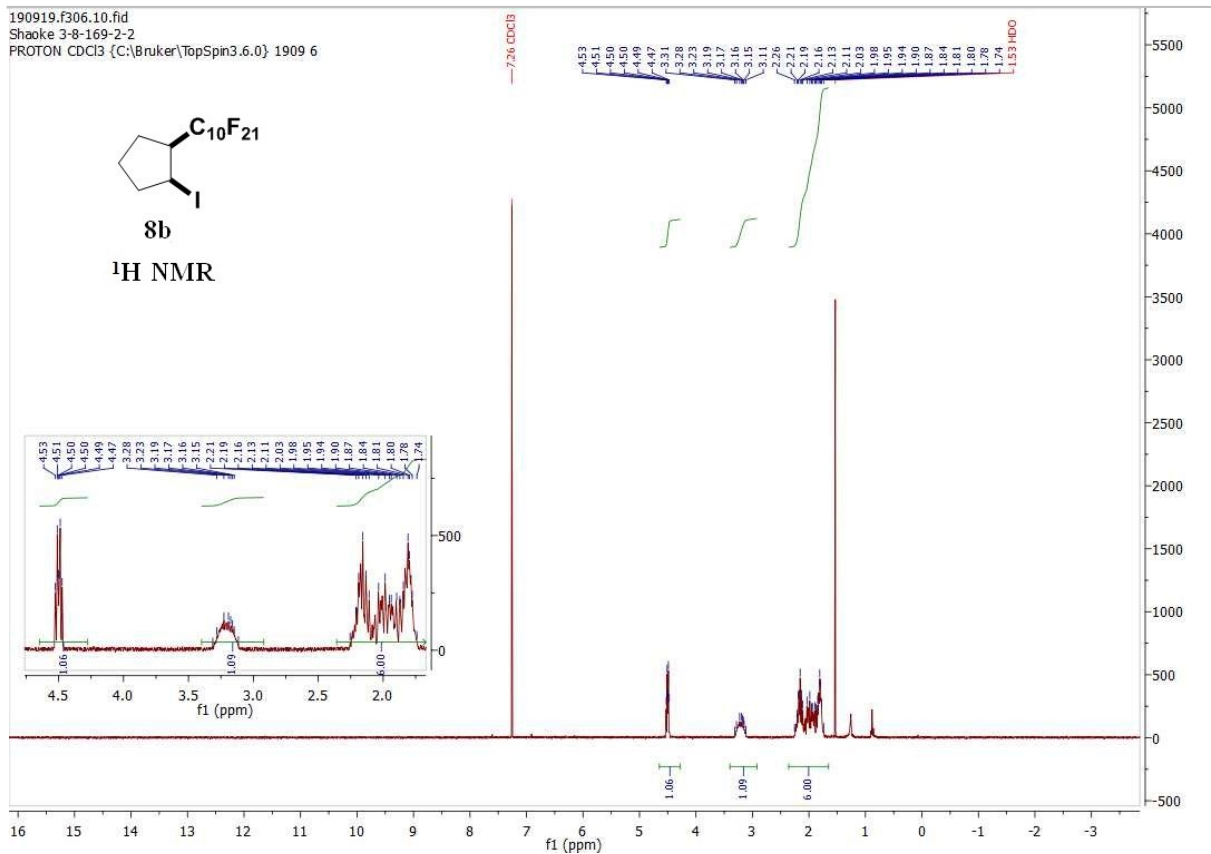

190920.419.10.fid  
 Shaake 3-8-169-2  
 Au13C CDCl<sub>3</sub> {C:\Bruker\TopSpin3.5pl6} 1909 19

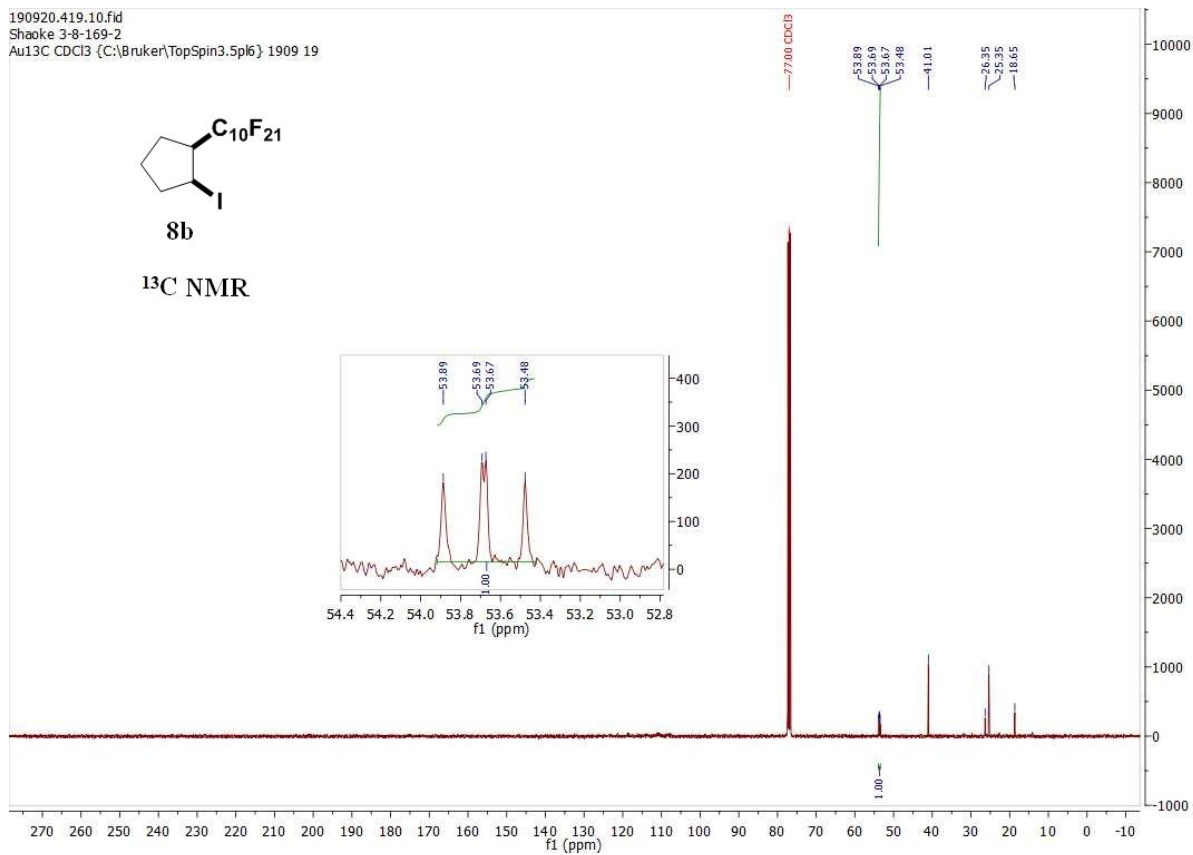

# SUPPORTING INFORMATION

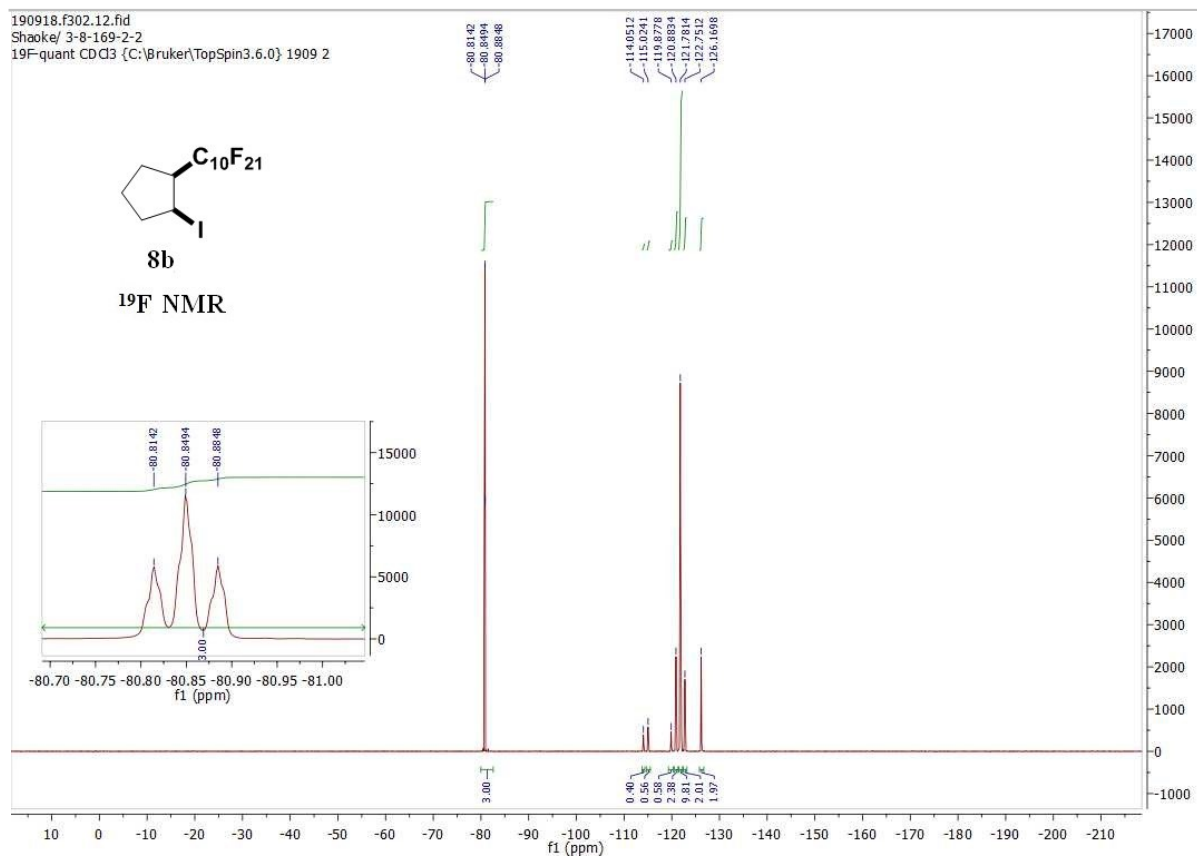

Supplement: d0cc06652d1.pdf [file d0cc06652d1.pdf]
